# Supplementary material for: Synthesis and properties of 1-(3′-dihydroxyboryl-2′,3′-dideoxyribosyl)pyrimidines
Source: Royal Society of Chemistry journal article supplement (doi:10.1039/c2ob26756j), 2012-01-01
Supplement: c2ob26756j.pdf [file c2ob26756j.pdf]

Synthesis and Properties of 1-(3-Dihydroxyboryl-2,3-dideoxyribosyl)pyrimidines”

Byung Ju Kim, Jinhua Zhang, Shenglan Tan, Donald S. Matteson\*, William H. Prusoff, and Yung-chi Cheng\*

Supporting Information

NMR spectra (in CDCl<sub>3</sub> if not otherwise specified); plots of cytotoxicity data and degradation of β-14b and β-14c.

| Compound number    | First NMR Page | Compound number | First NMR Page | Decomposition Studies           | Page |
|--------------------|----------------|-----------------|----------------|---------------------------------|------|
| 4                  | 2              | 13b             | 32             | β-14b (BFUdR)                   | 62   |
| 5                  | 3              | 13c             | 36             | β-14b (BFUdR) cytotoxicity data | 63   |
| 6                  | 5              | 13d             | 40             | 14a (BdThd)                     | 64   |
| 7                  | 7              | 14a             | 41             | 14c (BIdU)                      | 65   |
| 8                  | 9              | 14b             | 45             | 14d (BdCyd)                     | 66   |
| 9                  | 11             | 14c             | 49             | Summary of all stabilities      | 66   |
| 10                 | 13             | 14d             | 53             |                                 |      |
| 11                 | 15             | 16              | 54             |                                 |      |
| 12a                | 17             | 17              | 55             |                                 |      |
| 12d                | 21             | 18              | 56             |                                 |      |
| 13a                | 23             | 19              | 59             |                                 |      |
| Thymidine from 13a | 29             |                 |                |                                 |      |

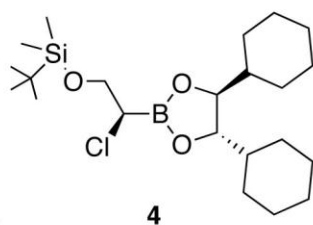

4

300-MHz  $^1\text{H}$ -NMR ( $\text{CDCl}_3$ )

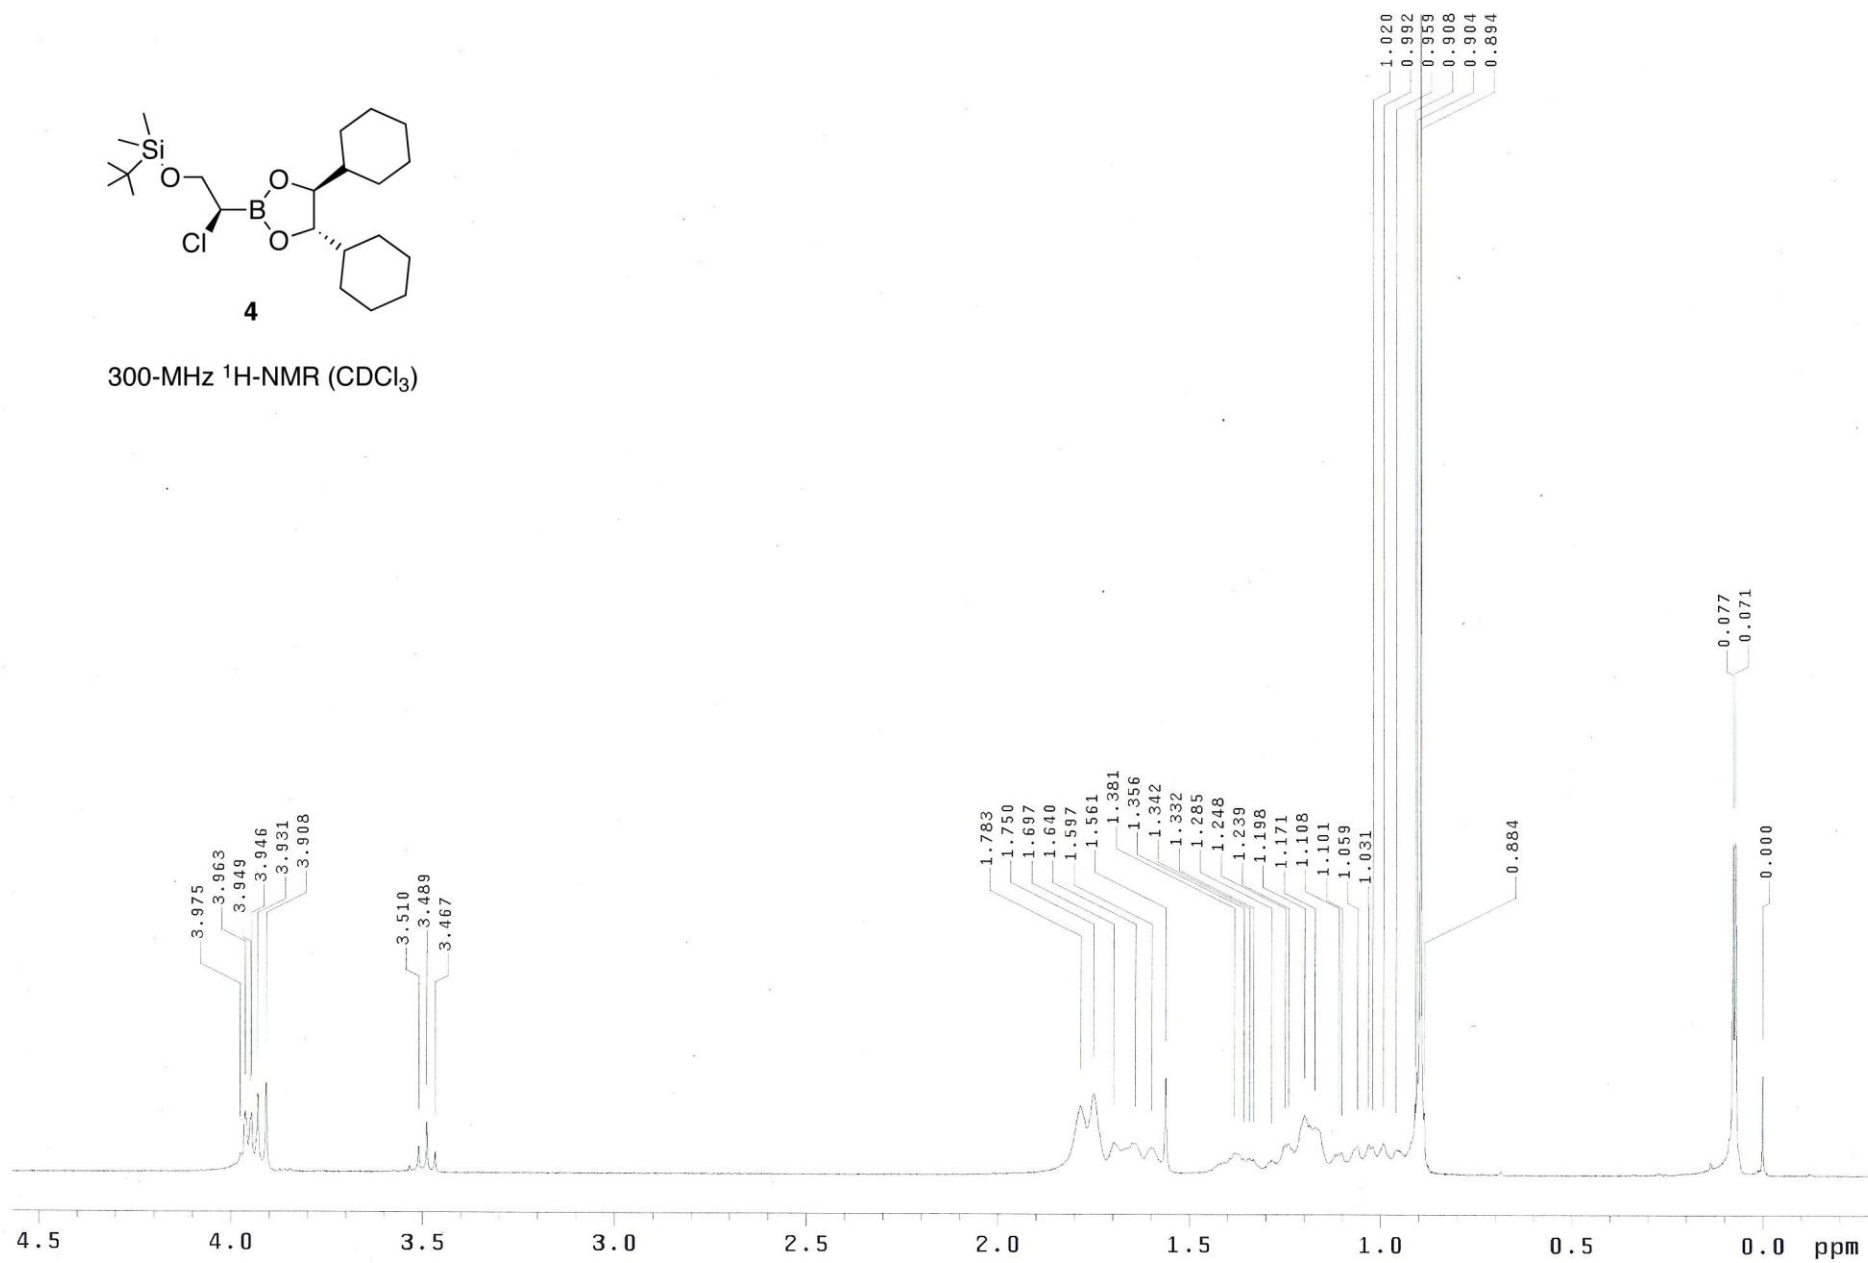

Purified TBSOCH<sub>2</sub>CHOBnB S,S'-DICH  
ED

exp1 s2pu1

|             |            |            |          |
|-------------|------------|------------|----------|
| SAMPLE      |            | SPECIAL    |          |
| date        | Dec 3 2008 | temp       | not used |
| solvent     | CDC13      | gain       | not used |
| file        | exp        | spin       | not used |
| ACQUISITION |            | hst        | 0.008    |
| sw          | 3602.3     | pw90       | 9.800    |
| at          | 1.998      | alfa       | 20.000   |
| np          | 14394      | FLAGS      |          |
| fb          | not used   | il         | n        |
| bs          | 16         | in         | n        |
| dl          | 1.000      | dp         | y        |
| nt          | 16         | hs         | nn       |
| ct          | 16         | PROCESSING |          |
| TRANSMITTER |            | fn         | not used |
| tn          | H1         | DISPLAY    |          |
| sfrq        | 300.144    | sp         | -300.4   |
| tof         | 1.3        | wp         | 3602.3   |
| tpwr        | 57         | rfl        | 300.4    |
| pw          | 4.900      | rfp        | 0        |
| DECOUPLER   |            | rp         | 45.9     |
| dn          | C13        | lp         | -49.9    |
| dof         | 0          | PLOT       |          |
| dm          | nnn        | wc         | 250      |
| dmm         | c          | sc         | 0        |
| dpwr        | 39         | vs         | 82       |
| dmf         | 13100      | th         | 14       |
|             | ai         | cdc        | ph       |

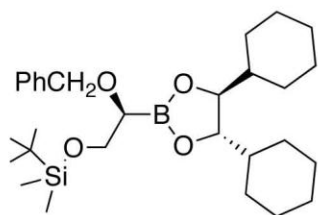

**5**  
300-MHz <sup>1</sup>H-NMR (CDCl<sub>3</sub>)

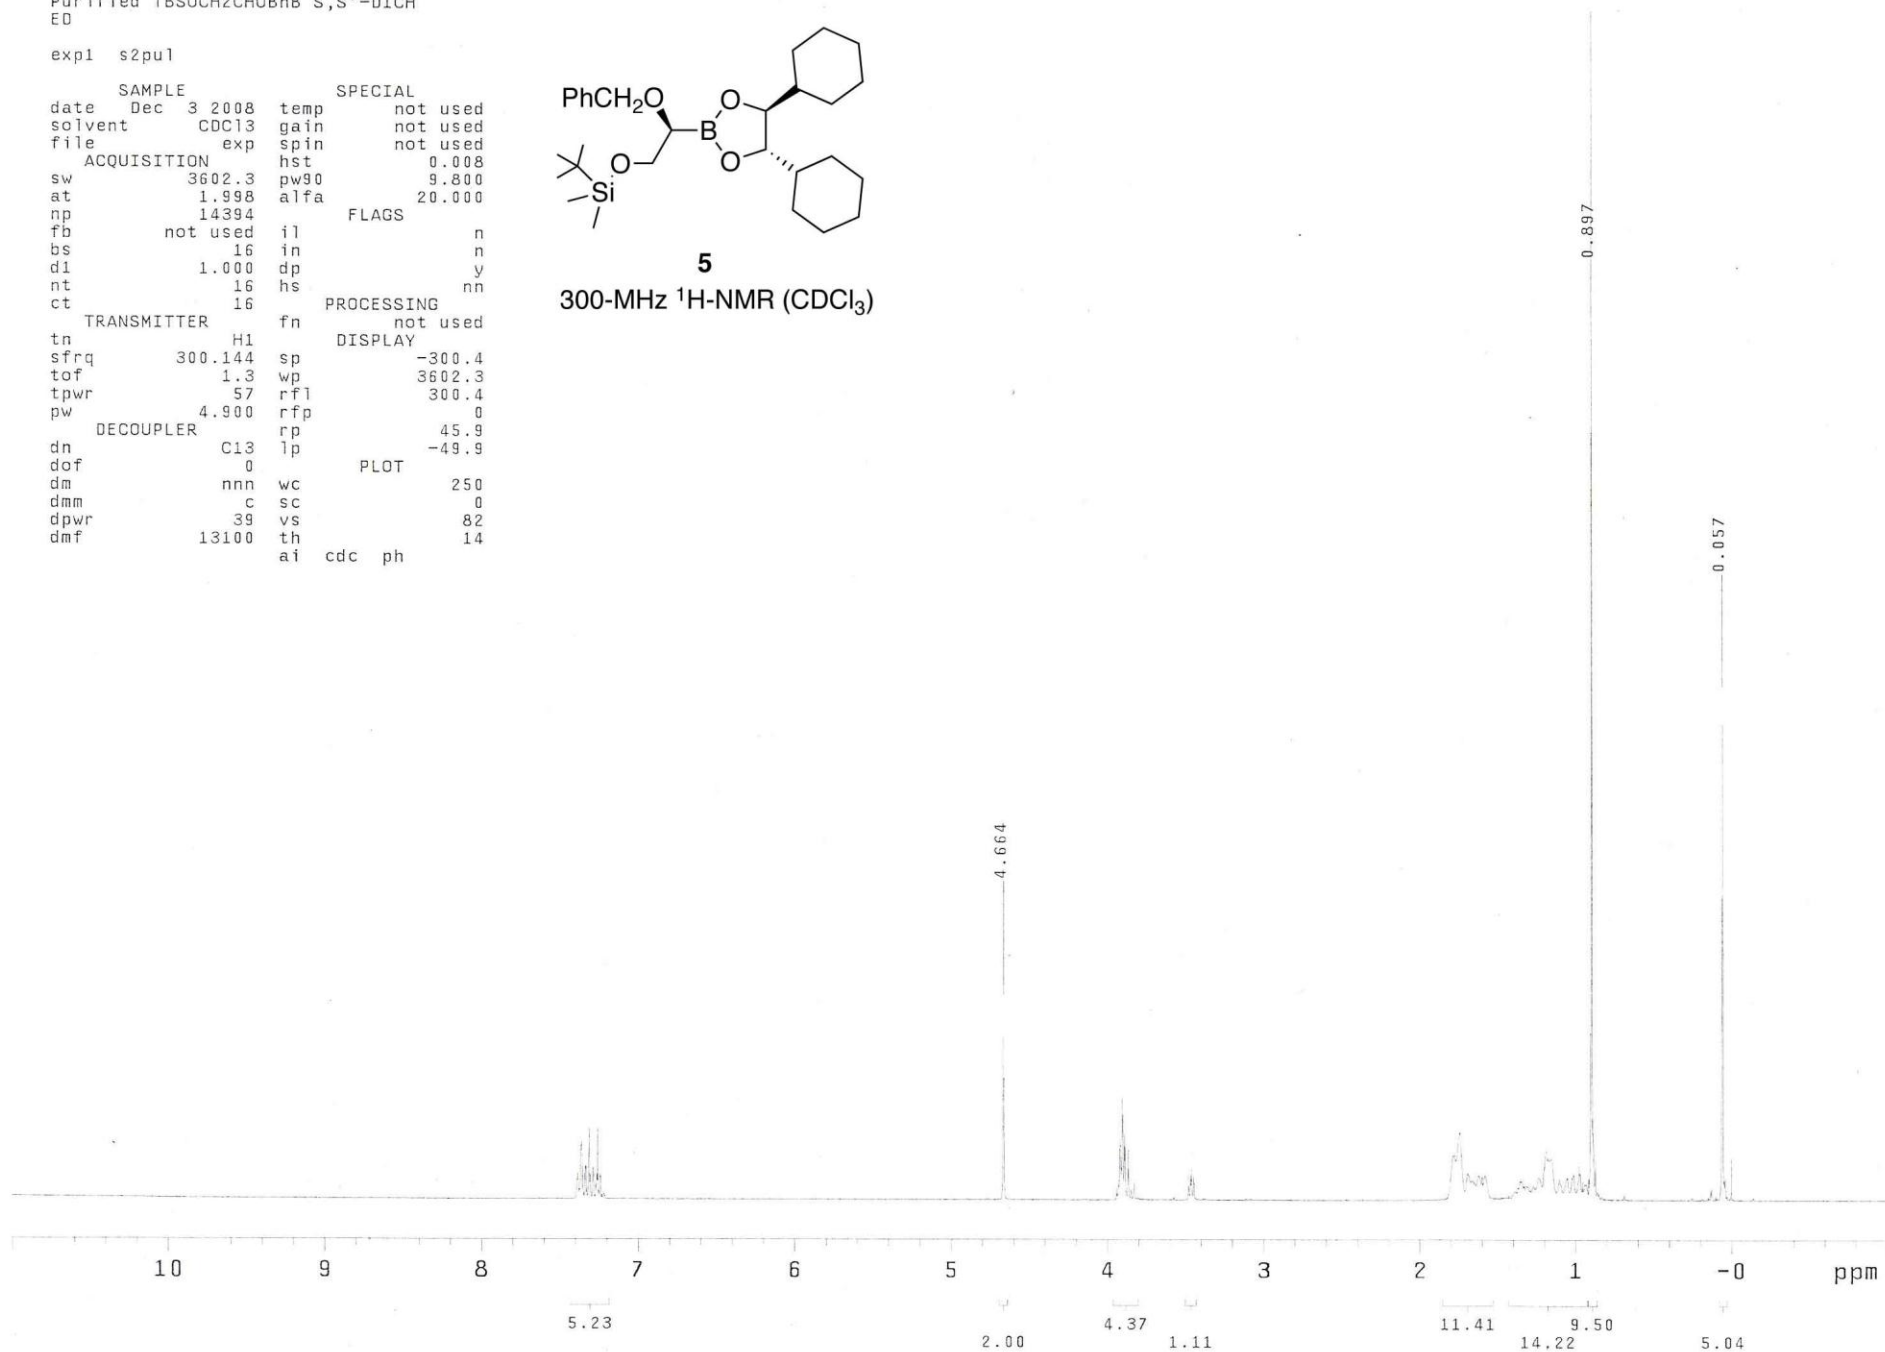

4

Transesterified  
TBSOCH<sub>2</sub>CHOBn pinanediol boronate

exp1 s2pul

| SAMPLE      |                   | SPECIAL    |          |
|-------------|-------------------|------------|----------|
| date        | Dec 3 2008        | temp       | not used |
| solvent     | CDCl <sub>3</sub> | gain       | not used |
| file        | exp               | spin       | not used |
| ACQUISITION |                   |            |          |
| sw          | 3602.3            | hst        | 0.008    |
| at          | 1.998             | pw90       | 9.800    |
| np          | 14394             | alfa       | 20.000   |
| TRANSMITTER |                   | FLAGS      |          |
| fb          | not used          | il         | n        |
| bs          | 16                | in         | n        |
| d1          | 1.000             | dp         | y        |
| nt          | 16                | hs         | nn       |
| ct          | 16                | PROCESSING |          |
| tn          | H1                | fn         | not used |
| sfrq        | 300.144           | DISPLAY    |          |
| tof         | 1.3               | sp         | -299.5   |
| tpwr        | 57                | wp         | 3602.3   |
| pw          | 4.900             | rfl        | 299.5    |
| DECOUPLER   |                   | rfp        | 0        |
| dn          | C13               | rp         | 44.9     |
| dof         | 0                 | lp         | -50.5    |
| dmm         | nnn               | PLOT       |          |
| dpwr        | 39                | wc         | 250      |
| dmf         | 13100             | sc         | 0        |
|             |                   | vs         | 89       |
|             |                   | th         | 3        |
|             |                   | af         | cdc ph   |

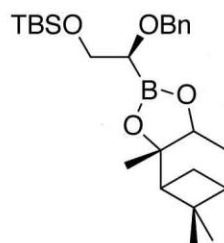

6

300-MHz <sup>1</sup>H-NMR  
(CDCl<sub>3</sub>)

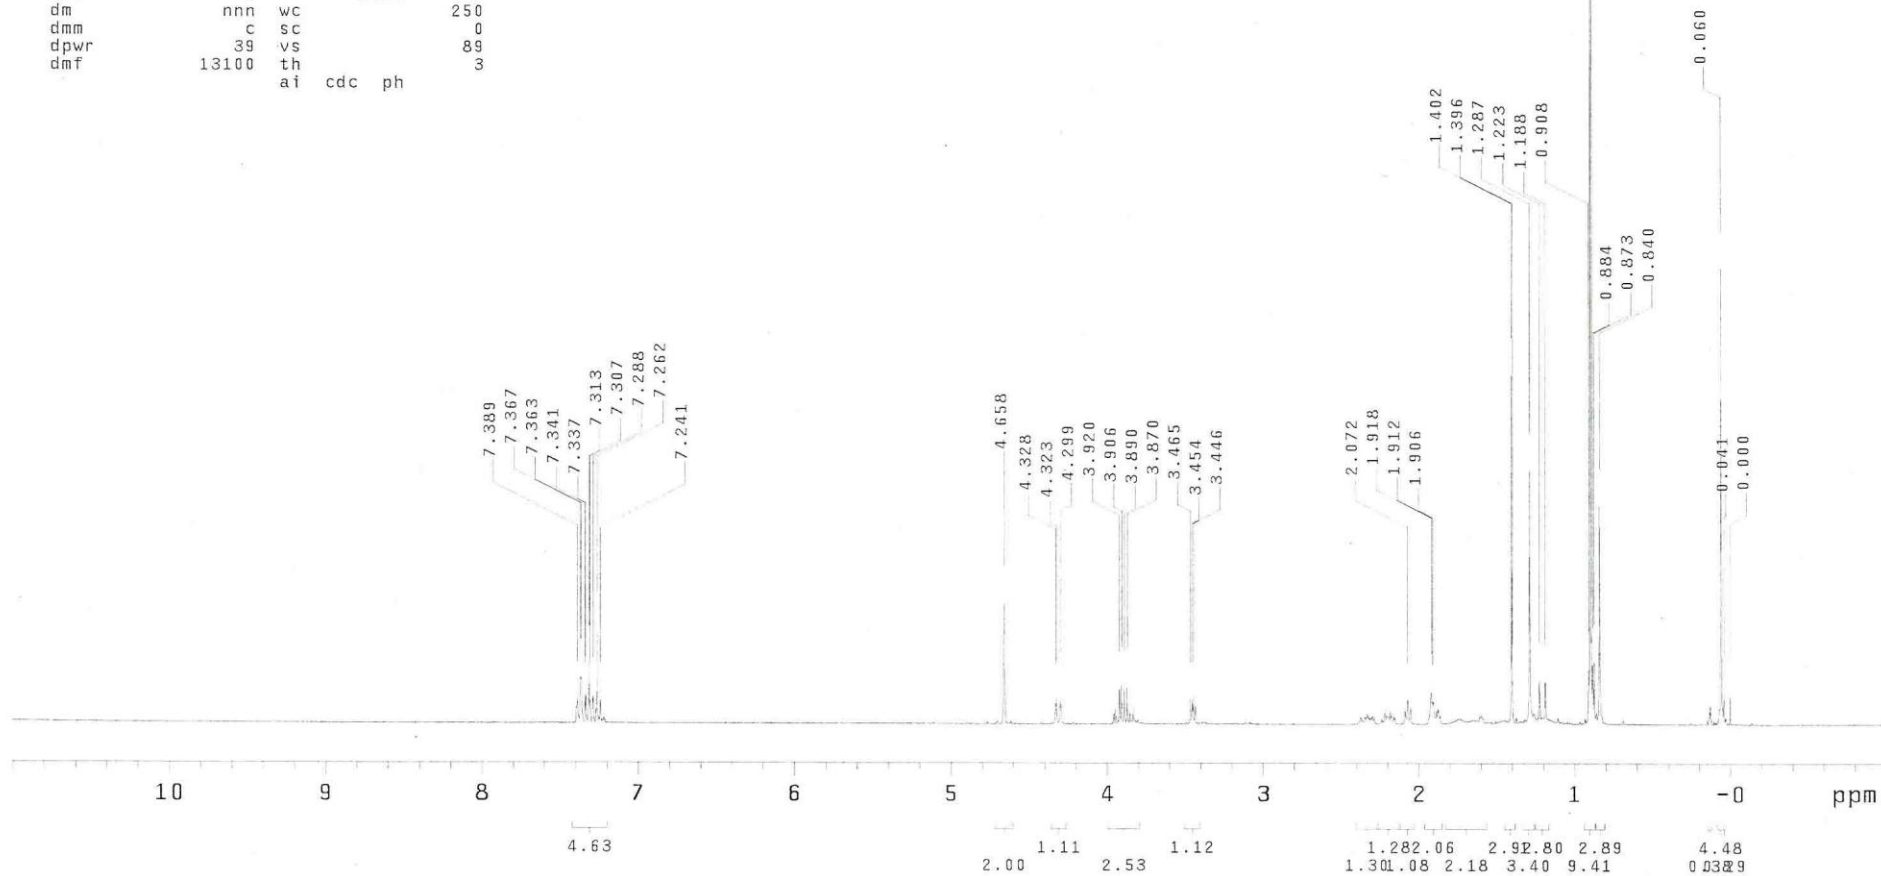

TBSOCH<sub>2</sub>CHOBnBP boronate, 13C

Archive directory: /export/home/kim/vnmrsys/data  
Sample directory: Deoxyribose\_B\_08Apr2009  
File: CARBON

Pulse Sequence: s2pul

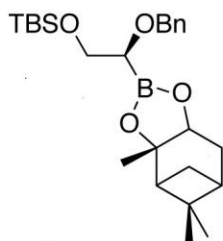

6

75-MHz <sup>13</sup>C-NMR  
(CDCl<sub>3</sub>)

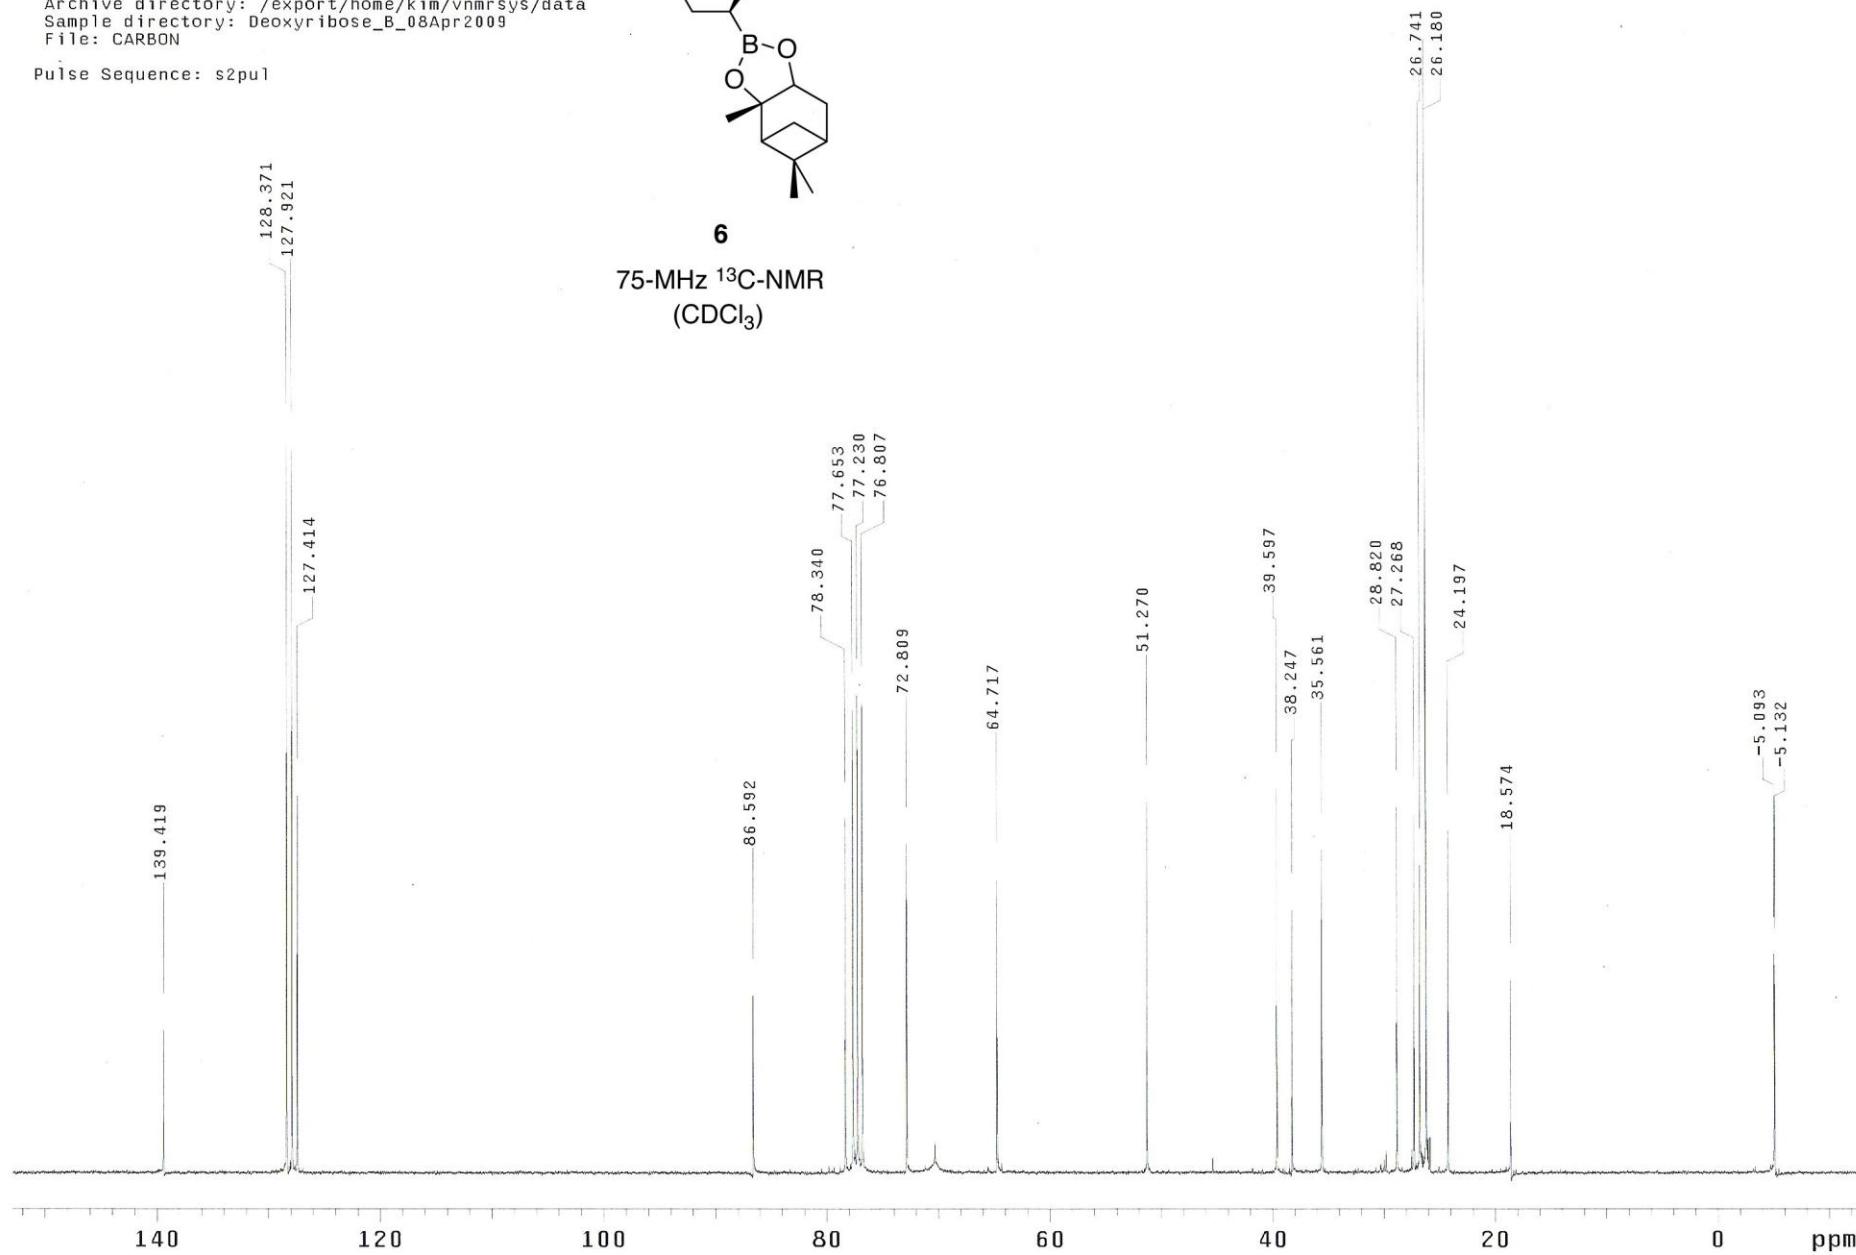

TBSOCH<sub>2</sub>CHOBNCHBrB+P  
Purified, 170mg

exp1 std1h

|             |             |            |          |
|-------------|-------------|------------|----------|
| SAMPLE      |             | DEC. & VT  |          |
| date        | Jan 17 2009 | dfrq       | 300.144  |
| solvent     | CDC13       | dn         | H1       |
| file        | exp         | dpwr       | 30       |
| ACQUISITION |             | dof        | 0        |
| sfrq        | 300.144     | dm         | nnn      |
| tn          | H1          | dmm        | c        |
| at          | 1.995       | dmf        | 200      |
| np          | 17984       | PROCESSING |          |
| sw          | 4506.5      | wtfile     |          |
| fb          | not used    | proc       | ft       |
| bs          | 4           | fn         | not used |
| tpwr        | 57          |            |          |
| pw          | 4.5         | werr       |          |
| d1          | 1.000       | wexp       |          |
| tof         | 0           | wbs        |          |
| nt          | 16          | wnt        |          |
| ct          | 16          |            |          |
| alock       | n           |            |          |
| gain        | not used    |            |          |
| FLAGS       |             |            |          |
| il          | n           |            |          |
| in          | n           |            |          |
| dp          | y           |            |          |
| DISPLAY     |             |            |          |
| sp          | -102.9      |            |          |
| wp          | 2621.5      |            |          |
| vs          | 148         |            |          |
| sc          | 0           |            |          |
| wc          | 250         |            |          |
| hzmm        | 10.49       |            |          |
| is          | 695.93      |            |          |
| rfl         | 753.2       |            |          |
| rfp         | 0           |            |          |
| th          | 5           |            |          |
| ins         | 2.000       |            |          |
| nm          | cdc         | ph         |          |

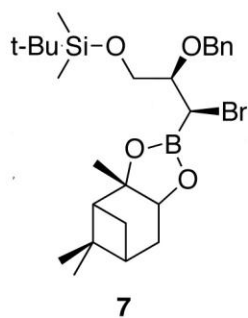

300-MHz <sup>1</sup>H-NMR

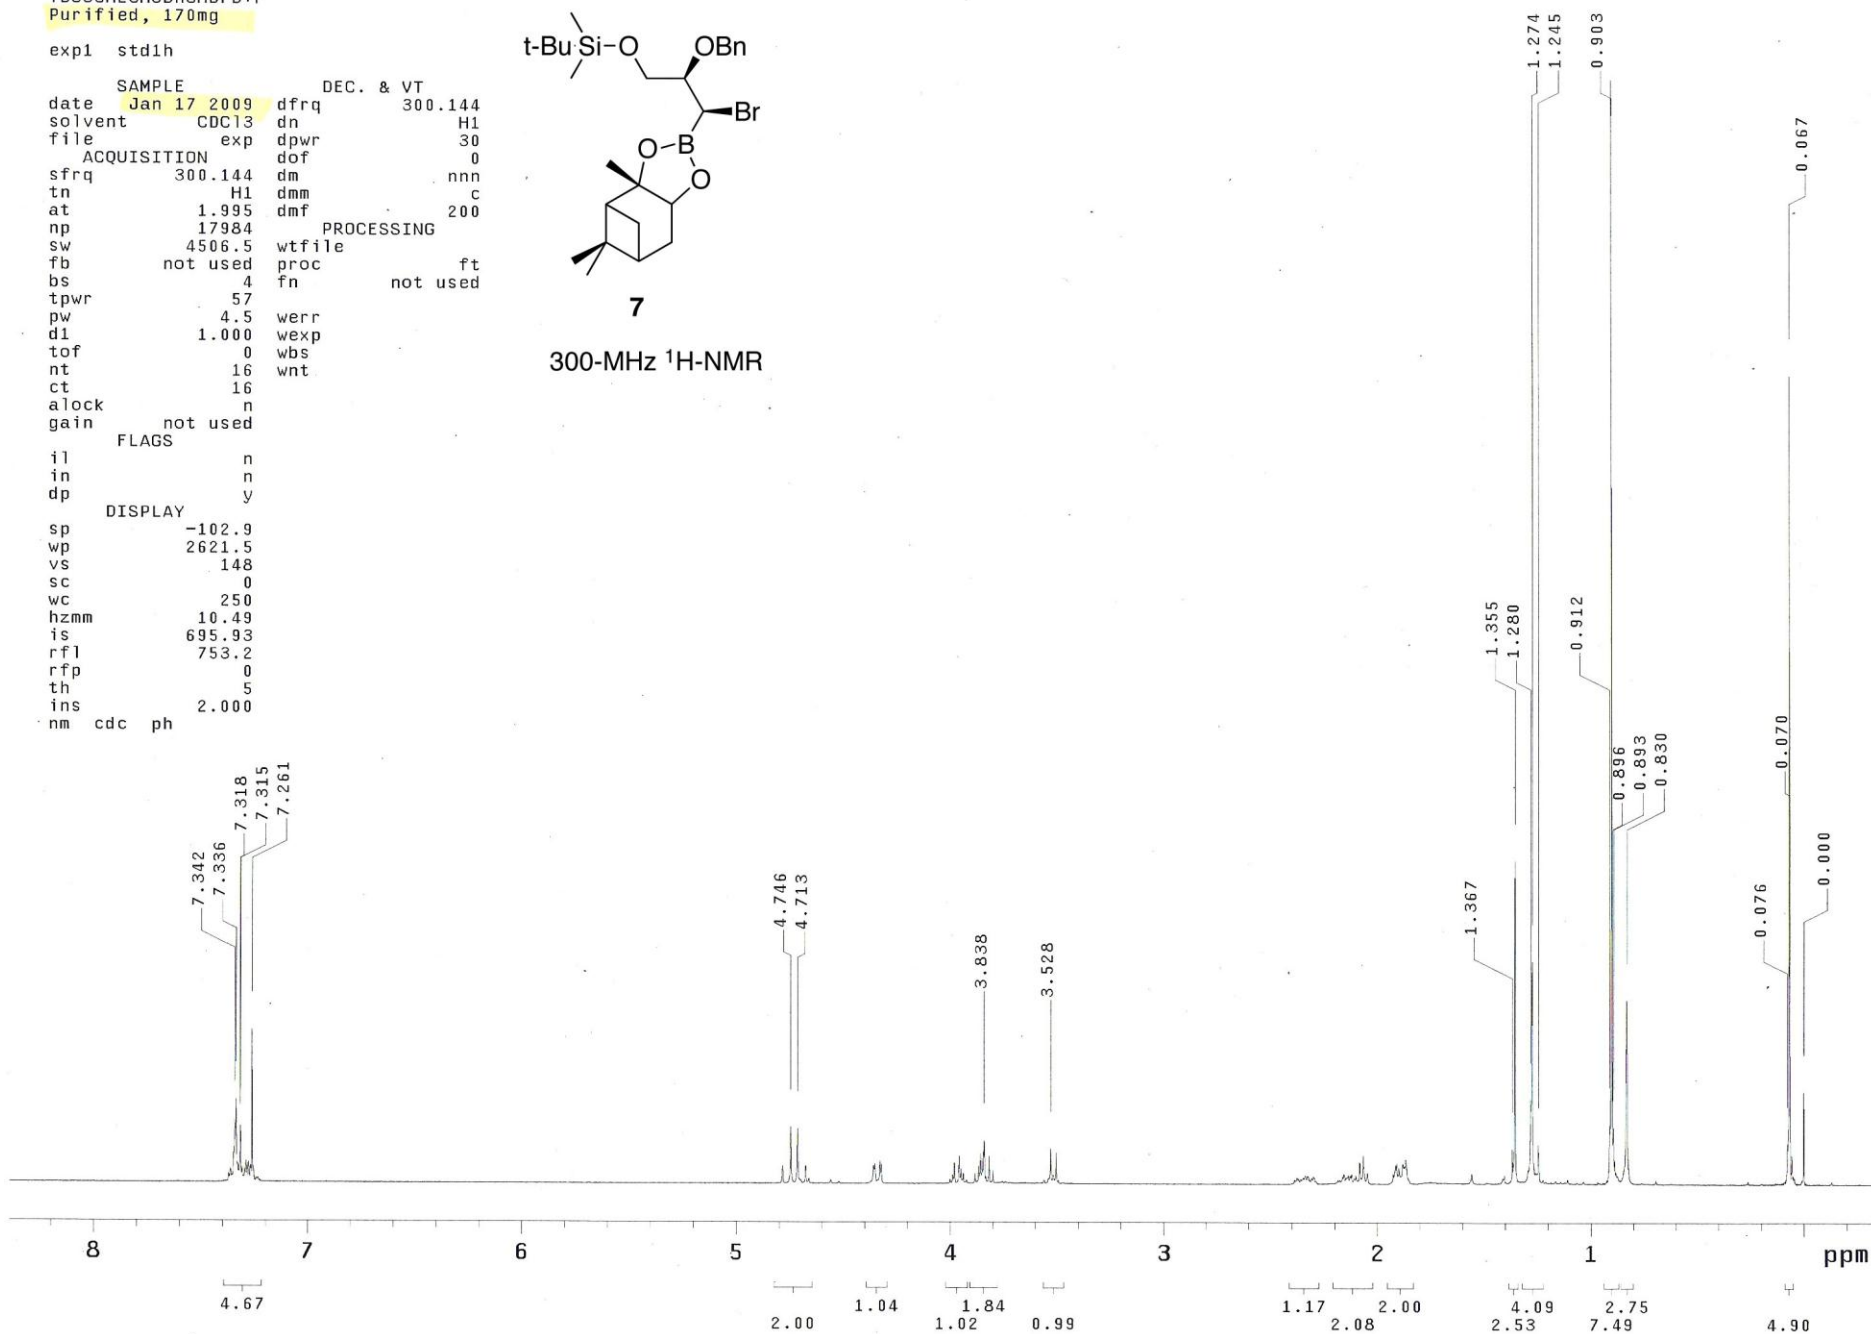

Solvent is CDCl<sub>3</sub> if not otherwise specified.

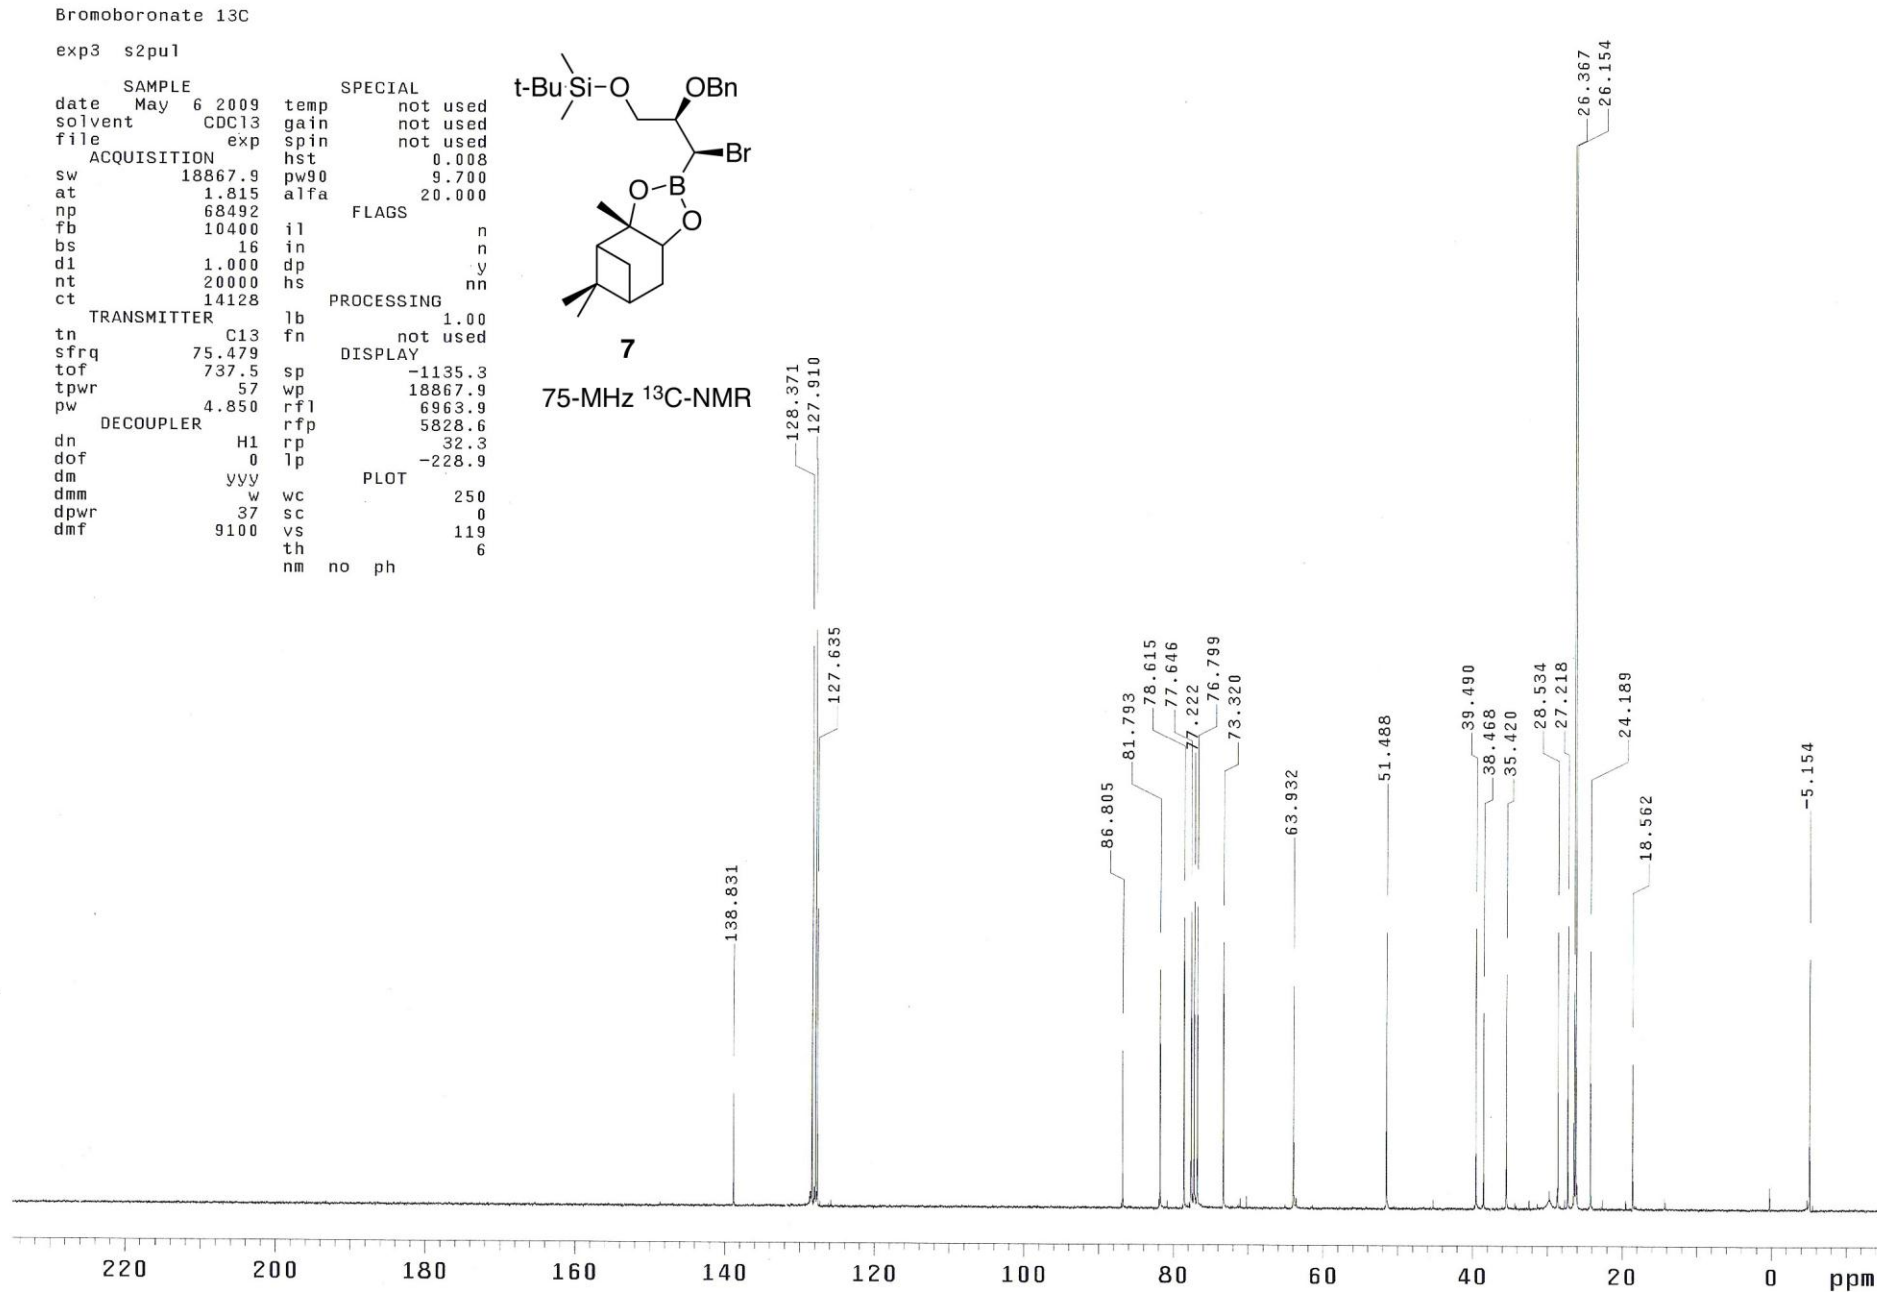

Pulse Sequence: s2pul

Solvent: CDCl<sub>3</sub>

Temp. 22.0 C / 295.1 K

INOVA-500 "nmrc500b"

Relax. delay 1.000 sec

Pulse 45.0 degrees

Acq. time 1.892 sec

Width 8000.0 Hz

8 repetitions

OBSERVE H1, 499.8560475 MHz

DATA PROCESSING

FT size 32768

Total time 0 min, 23 sec

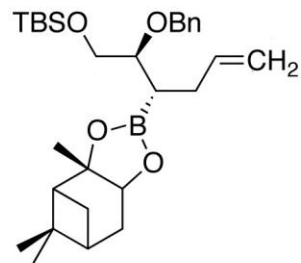

**8**

500-MHz <sup>1</sup>H-NMR  
(CDCl<sub>3</sub>)

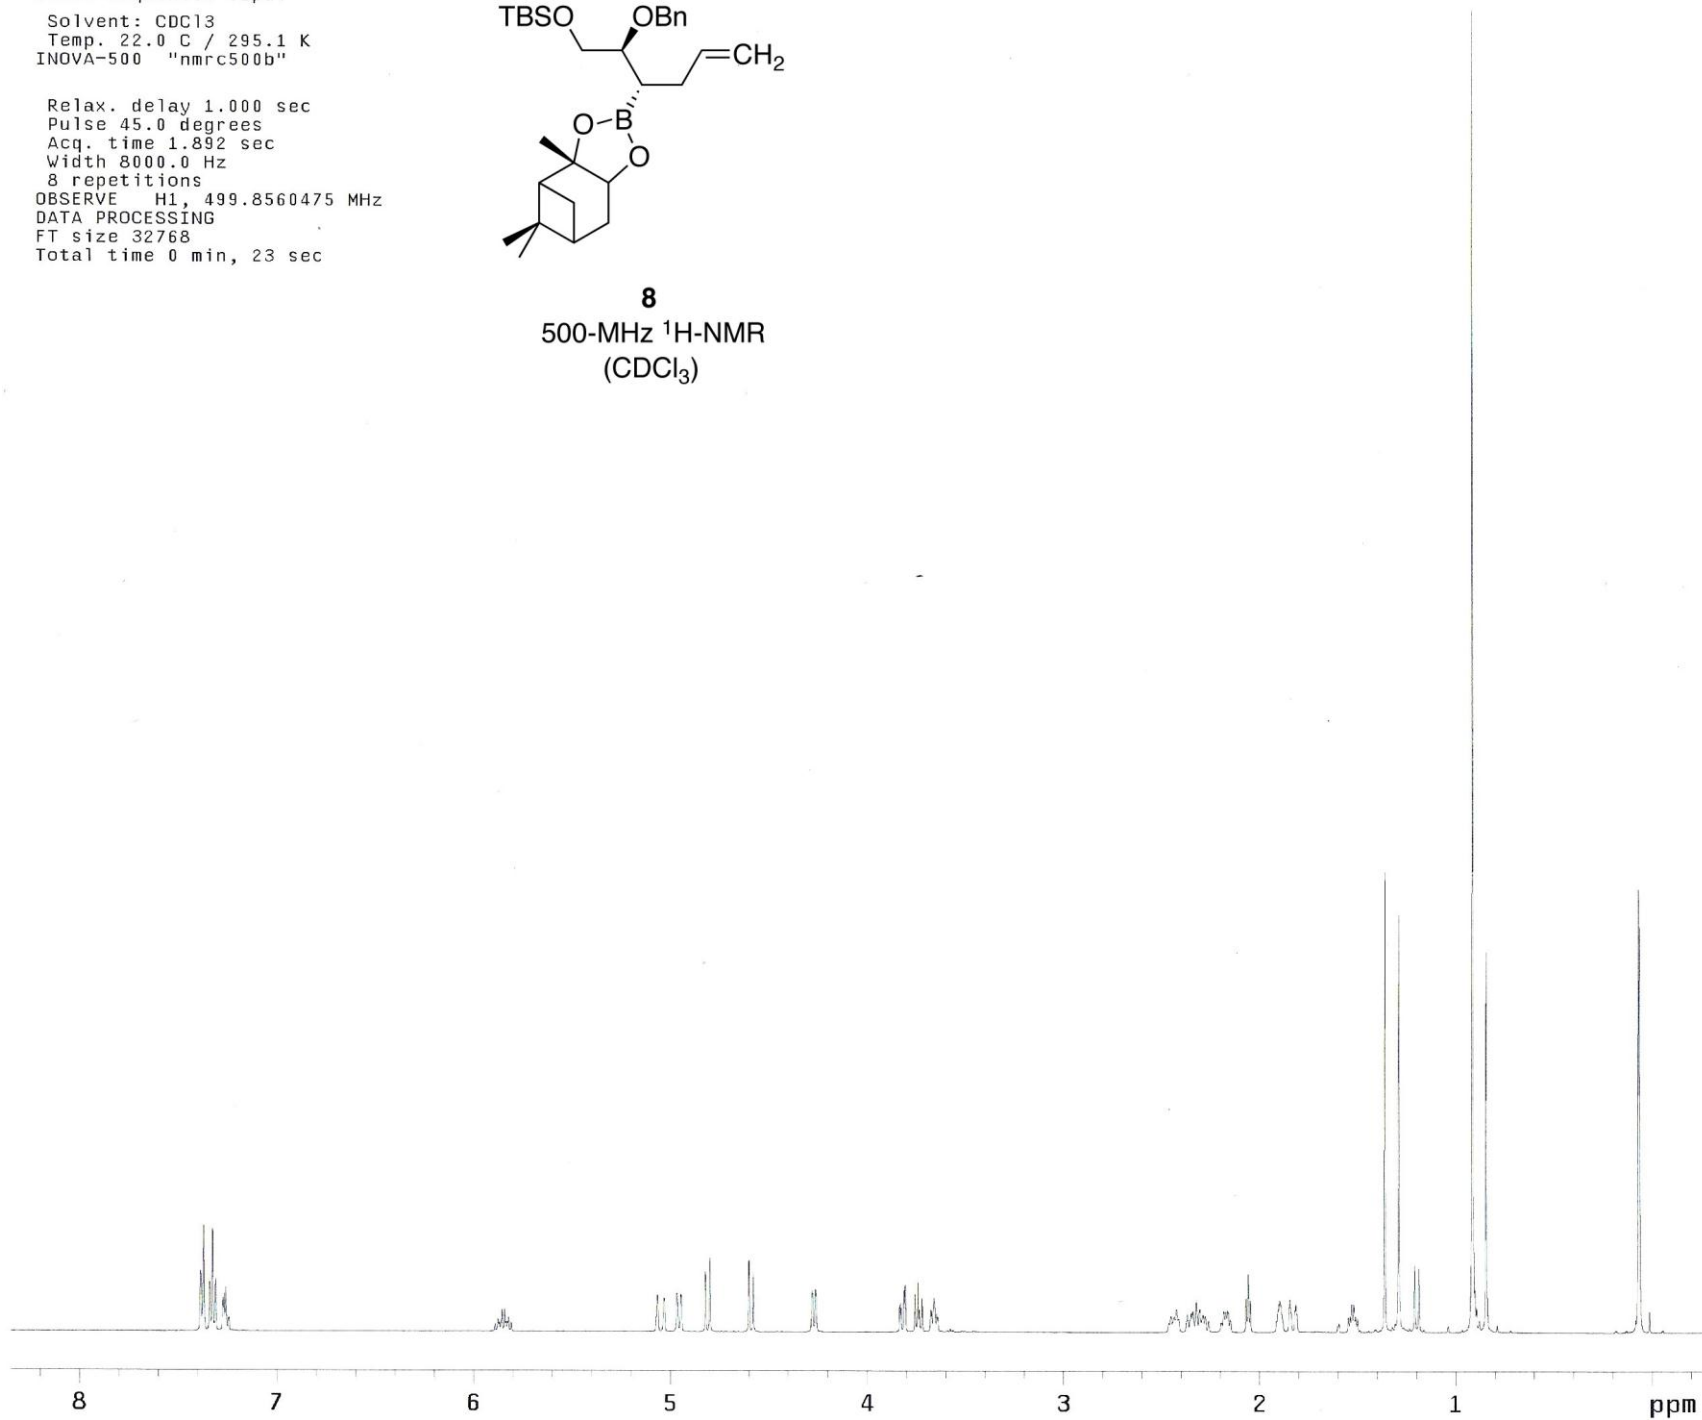

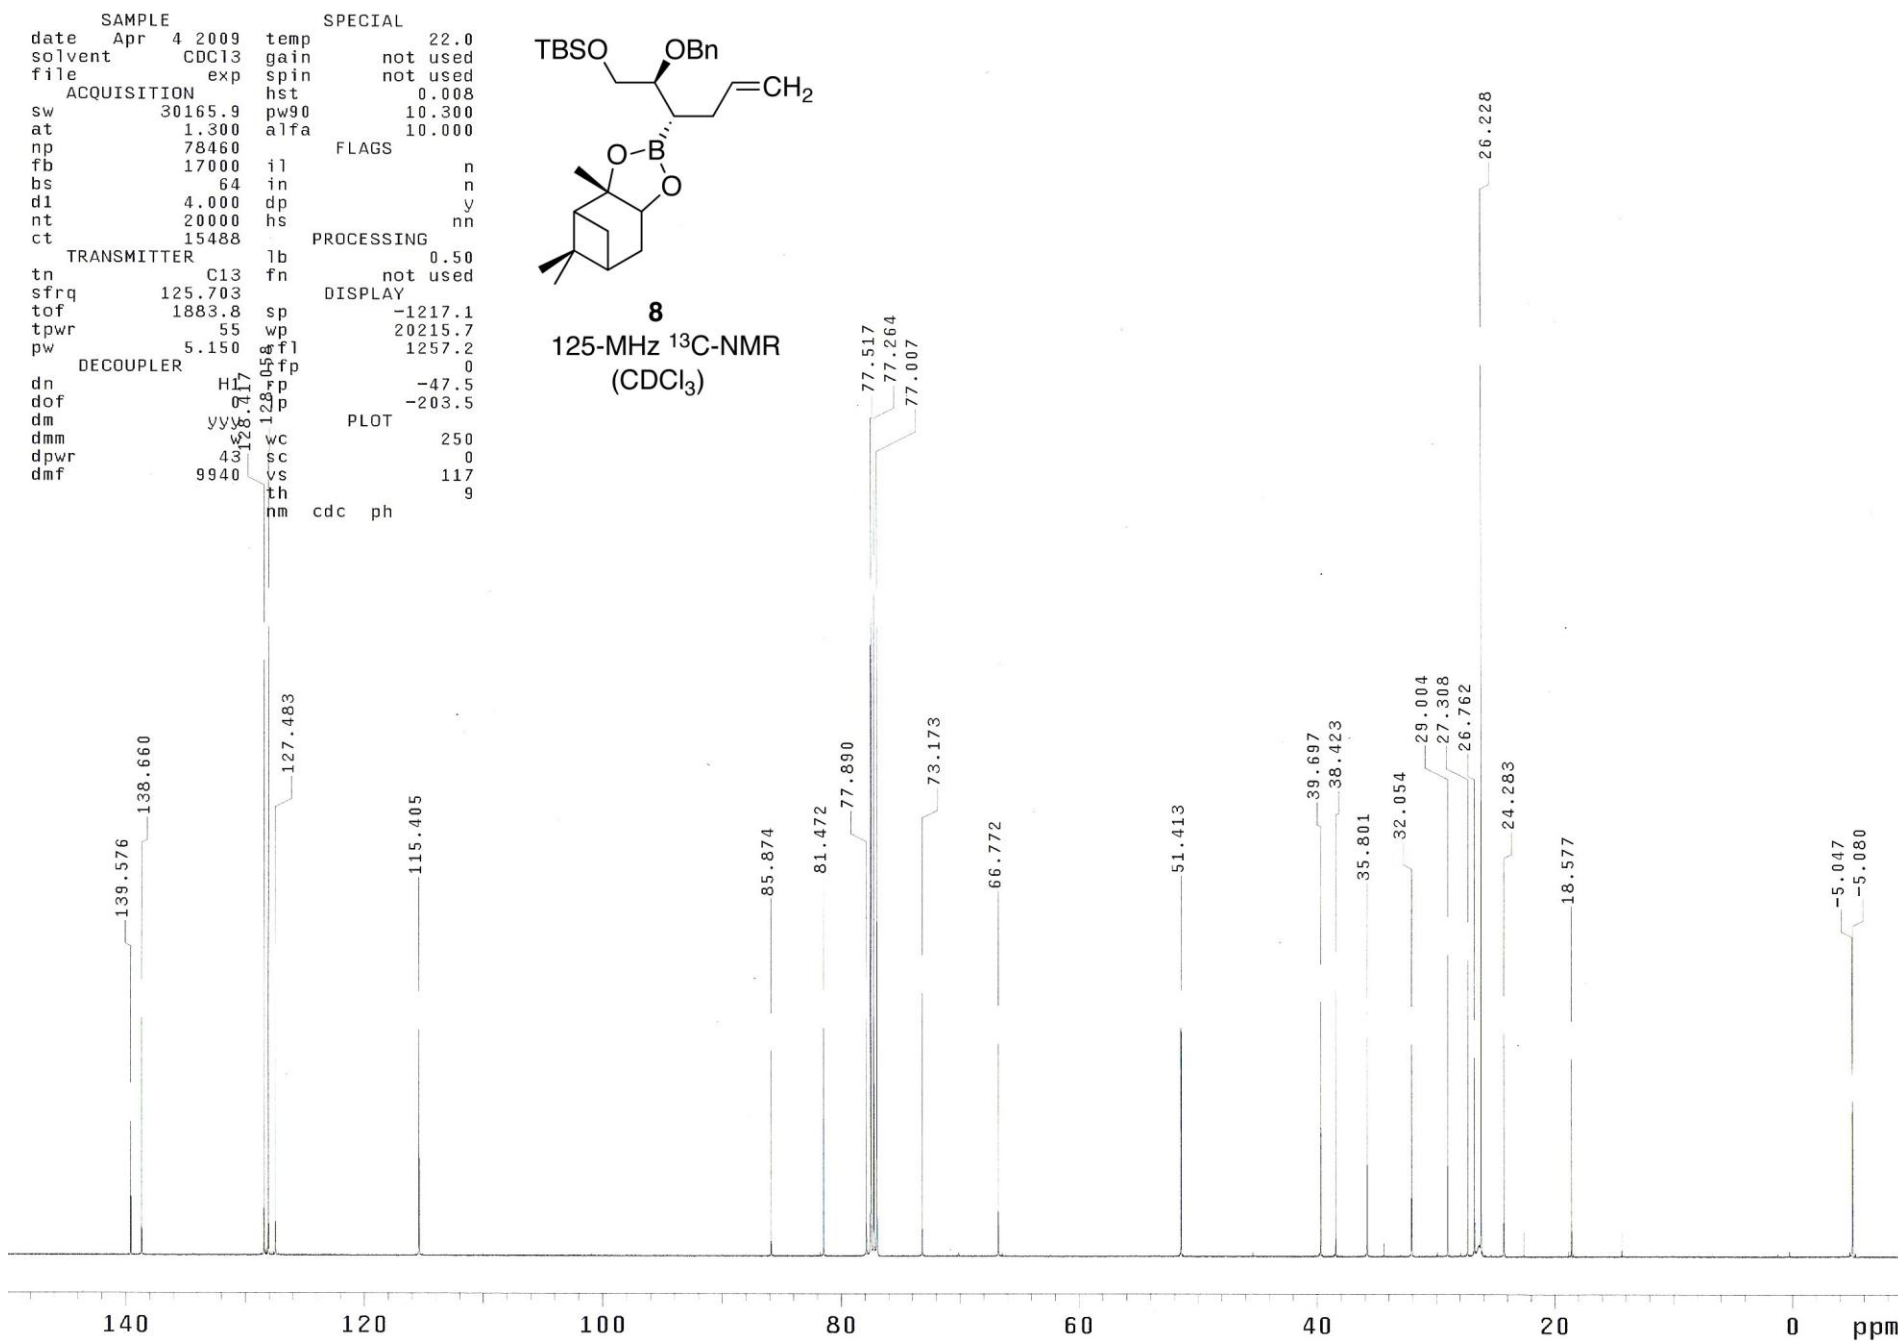

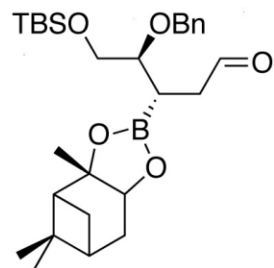

**9**

300-MHz  $^1\text{H}$ -NMR  
( $\text{CDCl}_3$ )

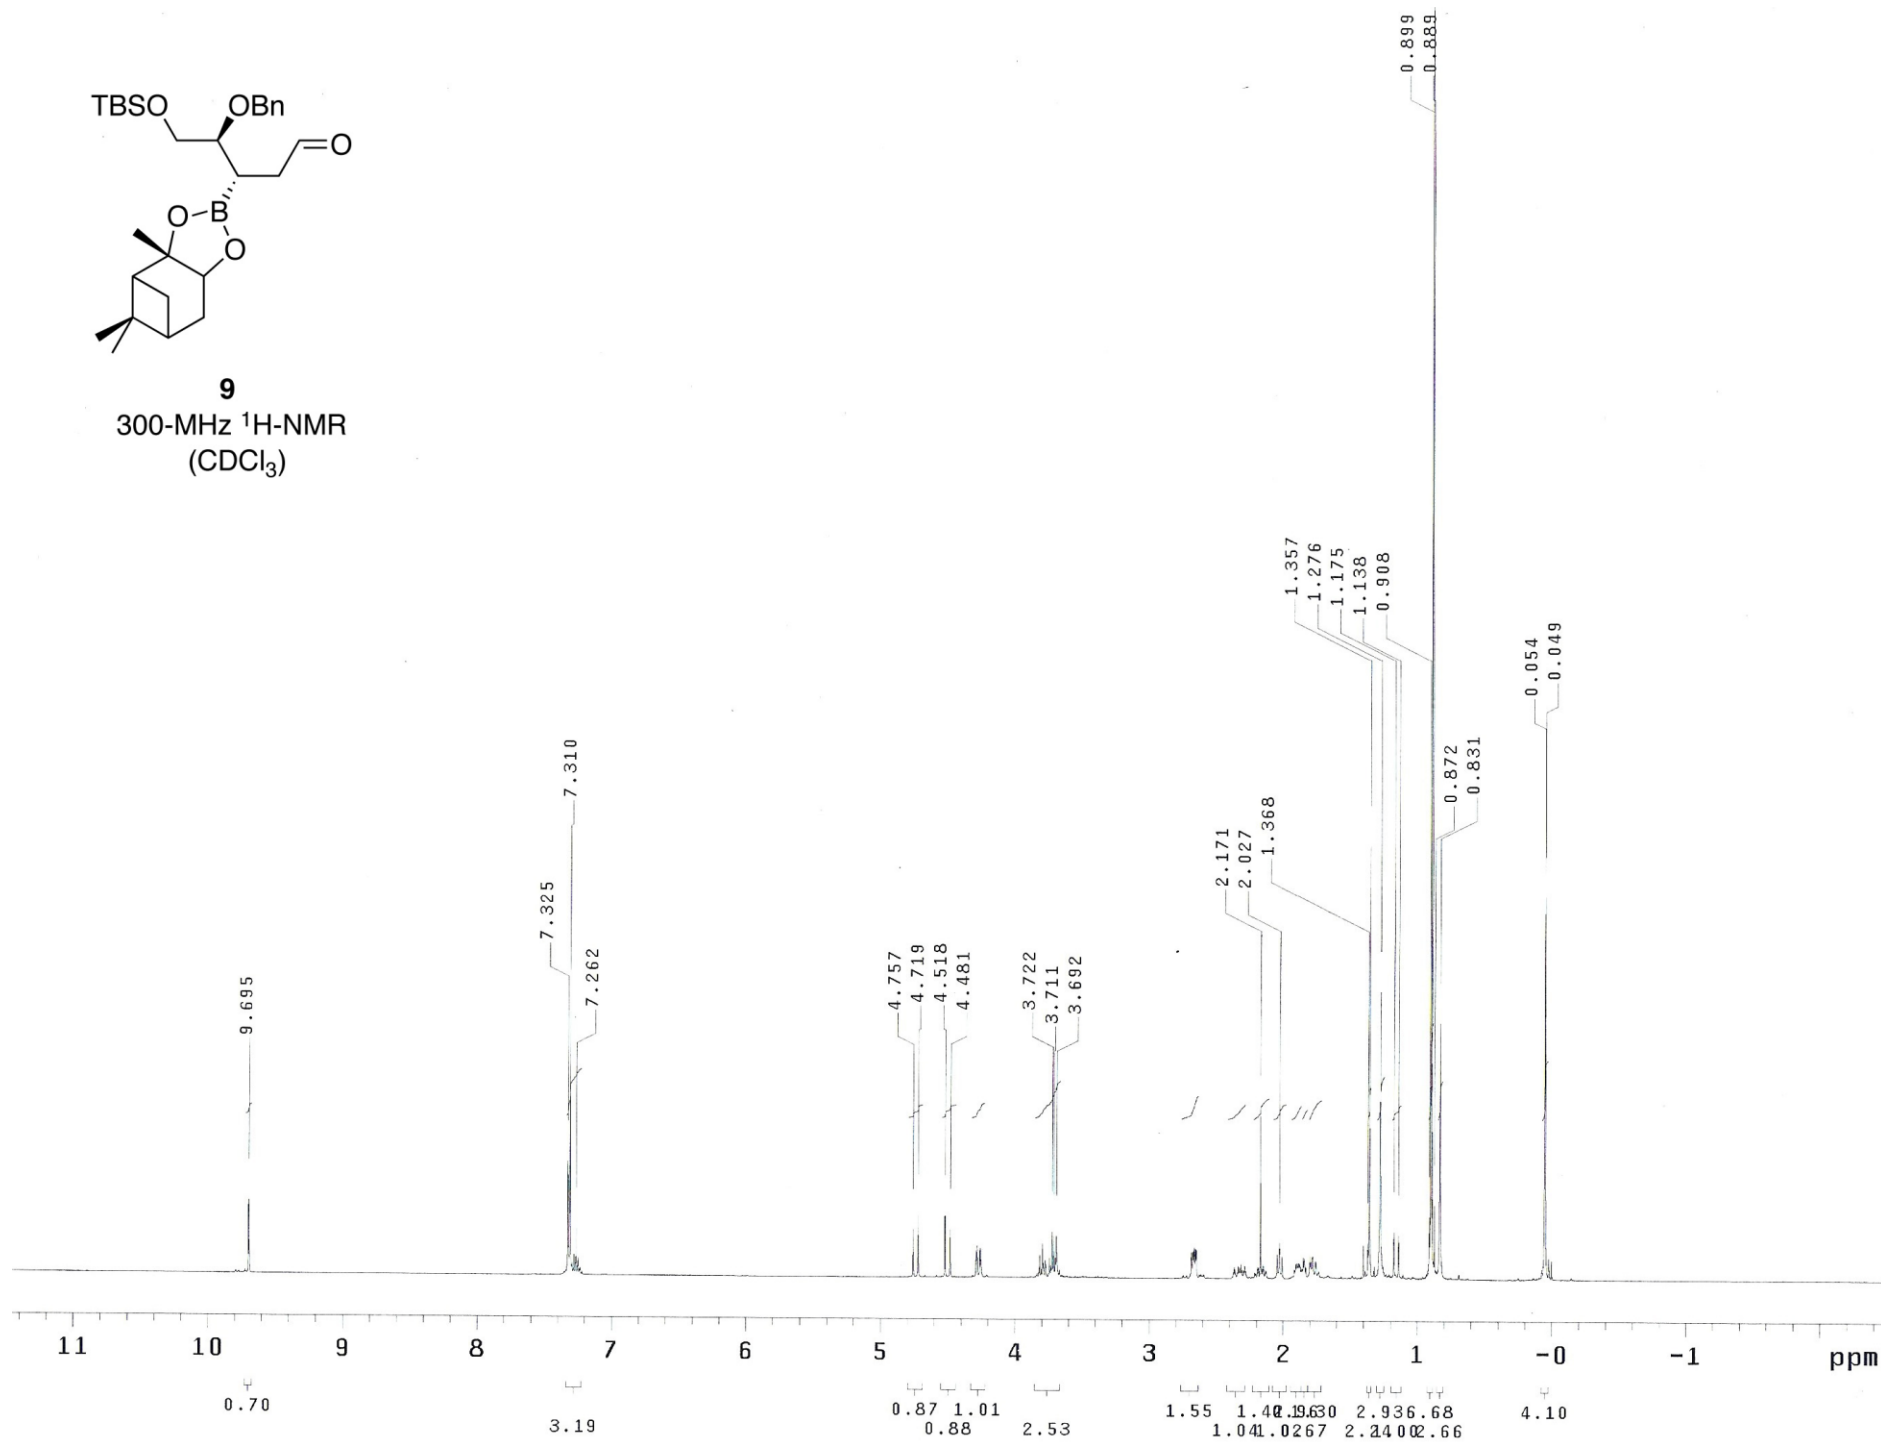

aldehyde boronate, <sup>13</sup>C

Archive directory: /export/home/kim/vnmrsys/data  
Sample directory: Ribose\_B\_C\_15Feb2009  
File: CARBON

Pulse Sequence: s2pu1

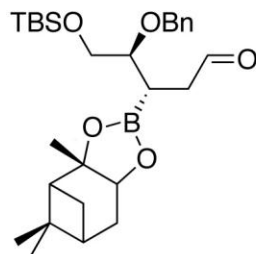

**9**  
75-MHz <sup>13</sup>C-NMR  
(CDCl<sub>3</sub>)

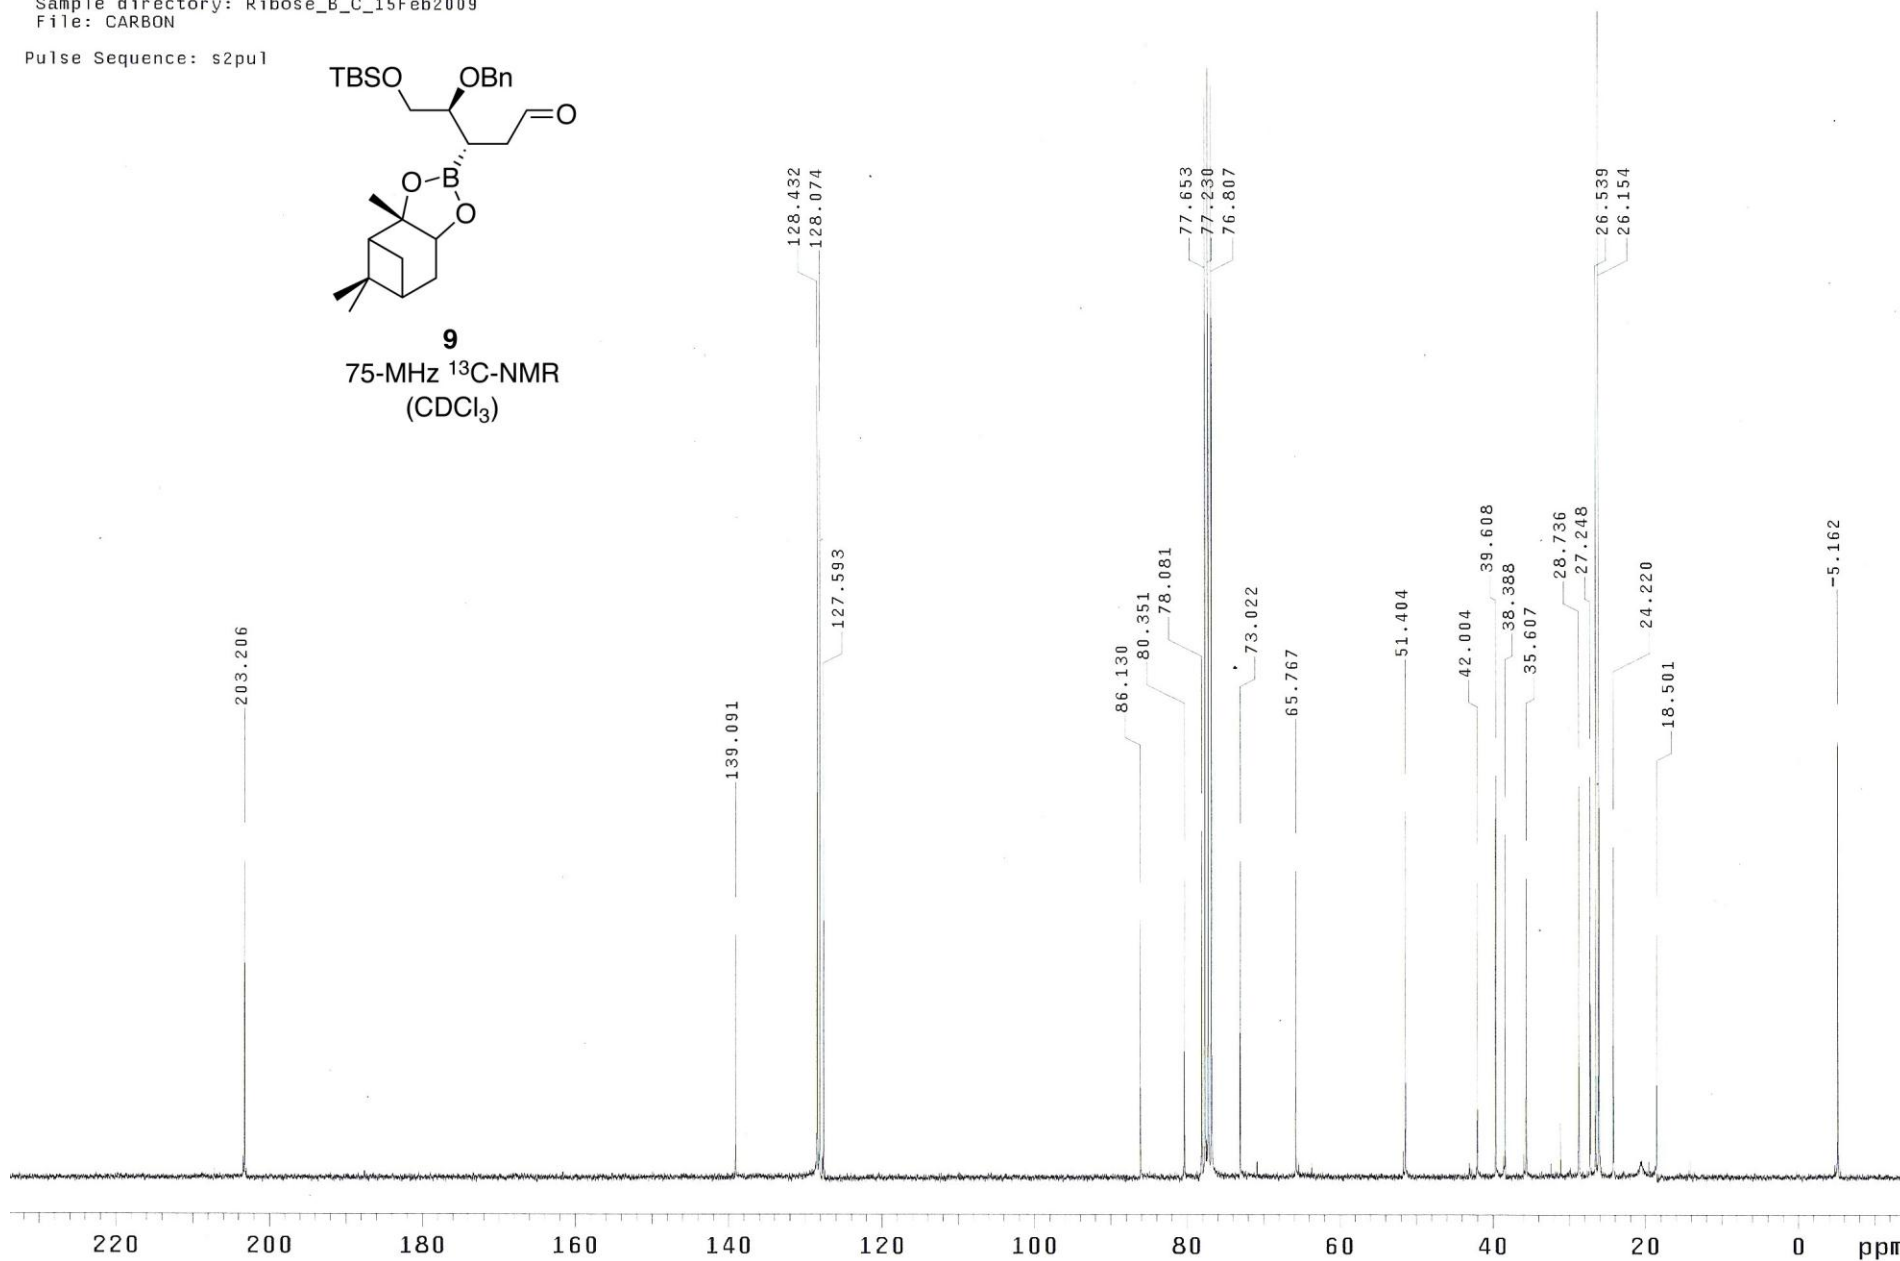

Ribose boronate  
latter fraction

exp1 std1h

|             |             |            |          |
|-------------|-------------|------------|----------|
| SAMPLE      |             | DEC. & VT  |          |
| date        | Feb 16 2009 | dfrq       | 300.144  |
| solvent     | CDC13       | dn         | H1       |
| file        | exp         | dpwr       | 30       |
| ACQUISITION |             | dof        | 0        |
| sfrq        | 300.144     | dm         | nnn      |
| tn          | H1          | dmm        | c        |
| at          | 1.995       | dmf        | 200      |
| np          | 17984       | PROCESSING |          |
| sw          | 4506.5      | wtfile     |          |
| fb          | not used    | proc       | ft       |
| bs          | 4           | fn         | not used |
| tpwr        | 57          |            |          |
| pw          | 4.5         | werr       |          |
| d1          | 1.000       | wexp       |          |
| tof         | 0           | wbs        |          |
| nt          | 16          | wnt        |          |
| ct          | 16          |            |          |
| alock       | n           |            |          |
| gain        | not used    |            |          |
| FLAGS       |             |            |          |
| il          | n           |            |          |
| in          | n           |            |          |
| dp          | y           |            |          |
| DISPLAY     |             |            |          |
| sp          | -234.9      |            |          |
| wp          | 2827.2      |            |          |
| vs          | 153         |            |          |
| sc          | 0           |            |          |
| wc          | 250         |            |          |
| hzmm        | 11.31       |            |          |
| is          | 75.30       |            |          |
| rfl         | 752.6       |            |          |
| rfp         | 0           |            |          |
| th          | 3           |            |          |
| ins         | 1.000       |            |          |
| nm          | cdc ph      |            |          |

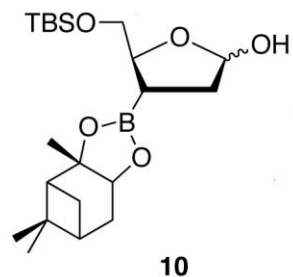

300-MHz <sup>1</sup>H-NMR

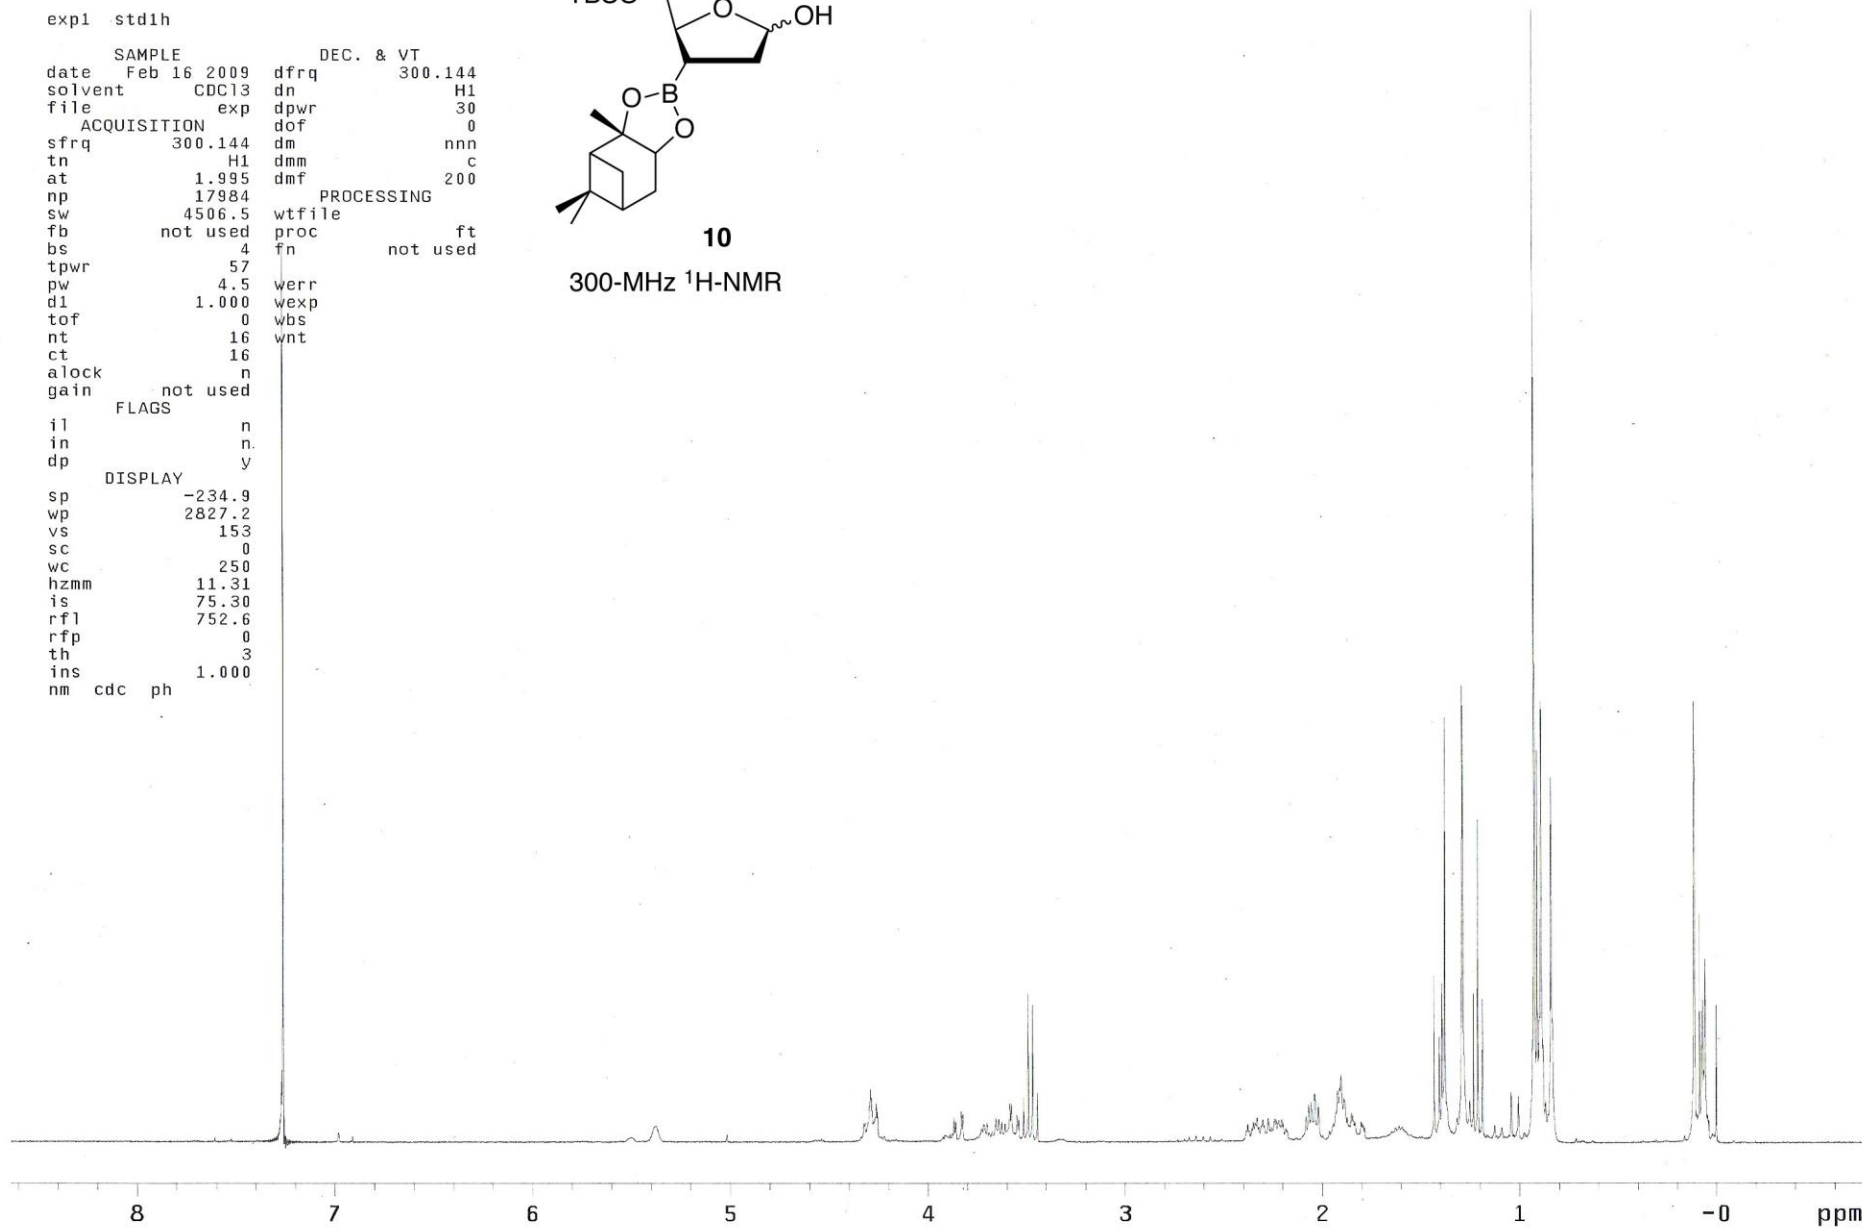

Ribose boronate  
Made on 2/15/09

exp3 s2pu1

|             |             |            |          |
|-------------|-------------|------------|----------|
| SAMPLE      |             | SPECIAL    |          |
| date        | Feb 15 2009 | temp       | not used |
| solvent     | CDCl3       | gain       | not used |
| file        | exp         | spin       | not used |
| ACQUISITION |             | hst        | 0.008    |
| sw          | 18867.9     | pw90       | 9.700    |
| at          | 1.815       | alfa       | 20.000   |
| np          | 68492       | FLAGS      |          |
| fb          | 10400       | il         | n        |
| bs          | 16          | in         | n        |
| dl          | 1.000       | dp         | y        |
| nt          | 20000       | hs         | nn       |
| ct          | 20000       | PROCESSING |          |
| TRANSMITTER |             | lb         | 1.00     |
| tn          | C13         | fn         | not used |
| sfrq        | 75.479      | DISPLAY    |          |
| tof         | 737.5       | sp         | -1133.5  |
| tpwr        | 57          | wp         | 18867.9  |
| pw          | 4.850       | rfl        | 6962.1   |
| DECOUPLER   |             | rfp        | 5828.6   |
| dn          | H1          | rp         | -16.3    |
| dof         | 0           | lp         | -219.2   |
| dm          | yyv         | PLOT       |          |
| dmm         | w           | wc         | 250      |
| dpwr        | 37          | sc         | 0        |
| dmf         | 9100        | vs         | 289      |
|             |             | th         | 2        |
|             |             | ai         | no ph    |

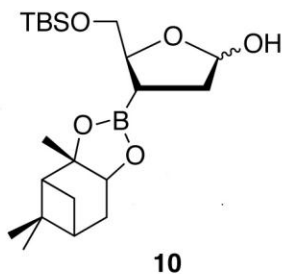

75-MHz <sup>13</sup>C-NMR

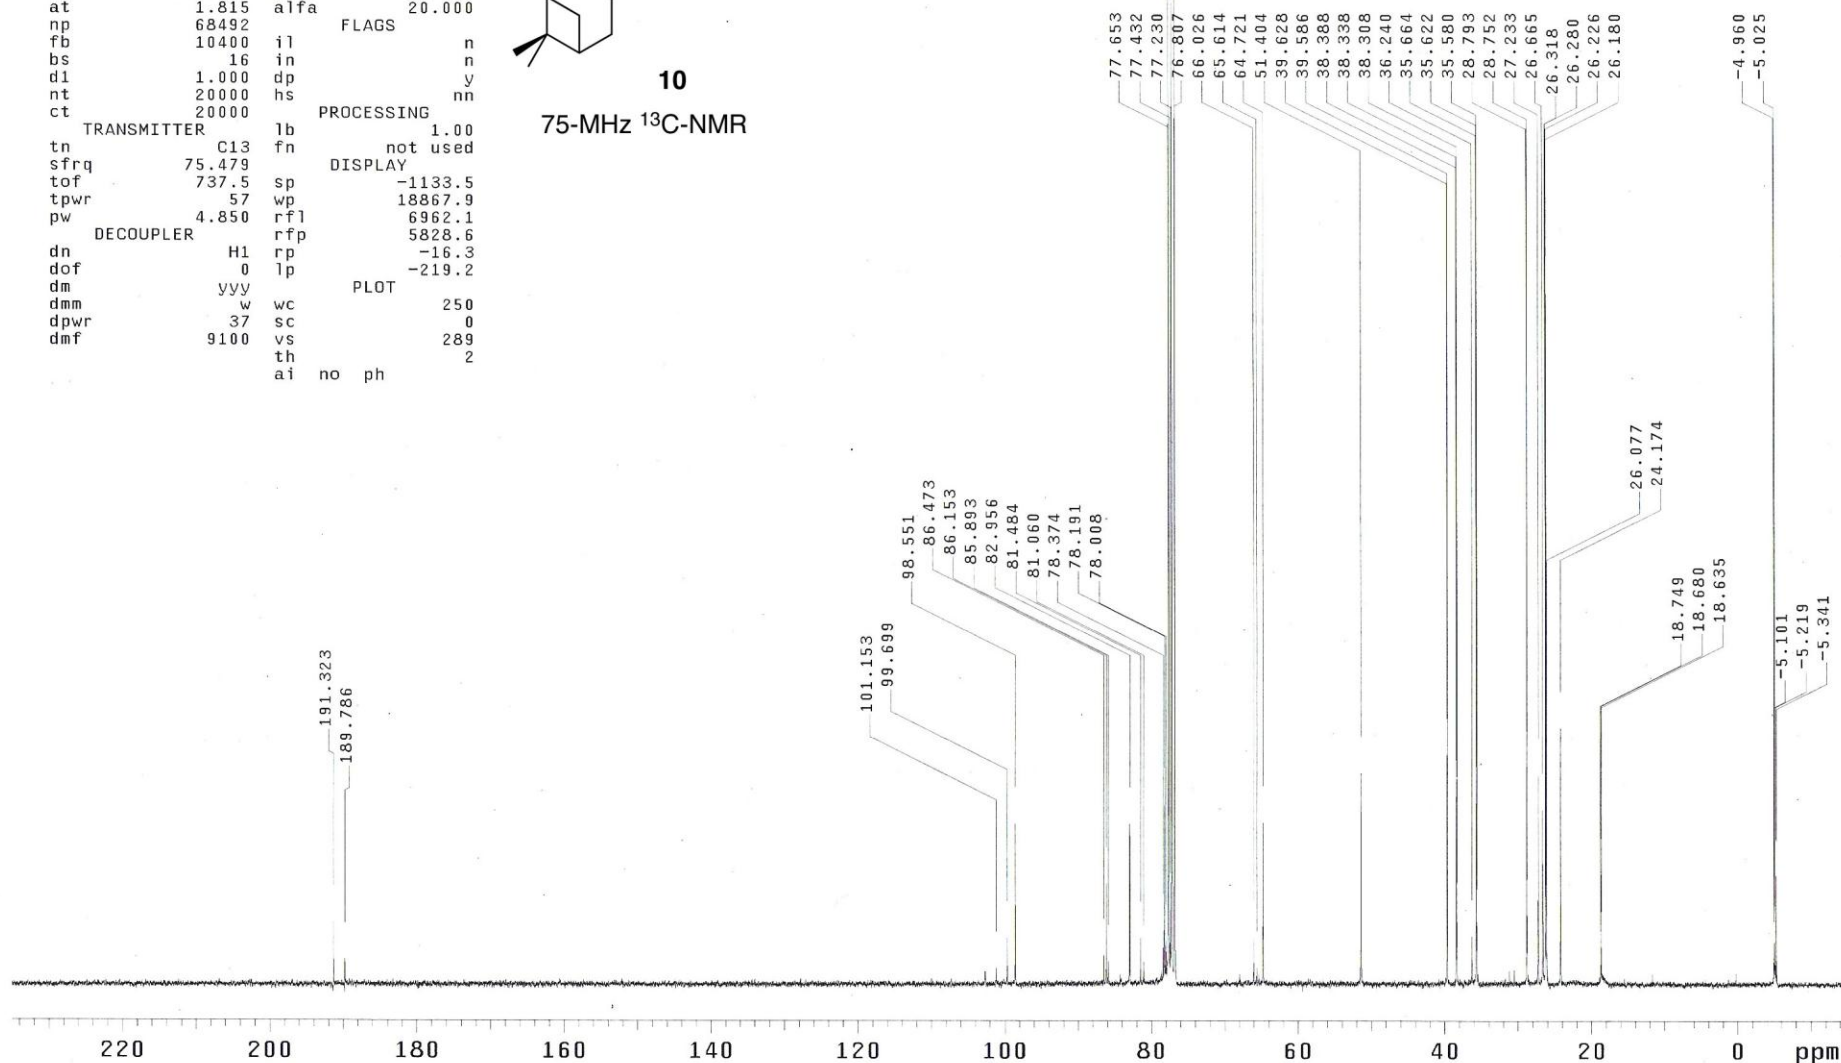

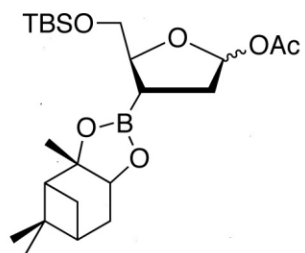

**11**

300-MHz  $^1\text{H}$ -NMR

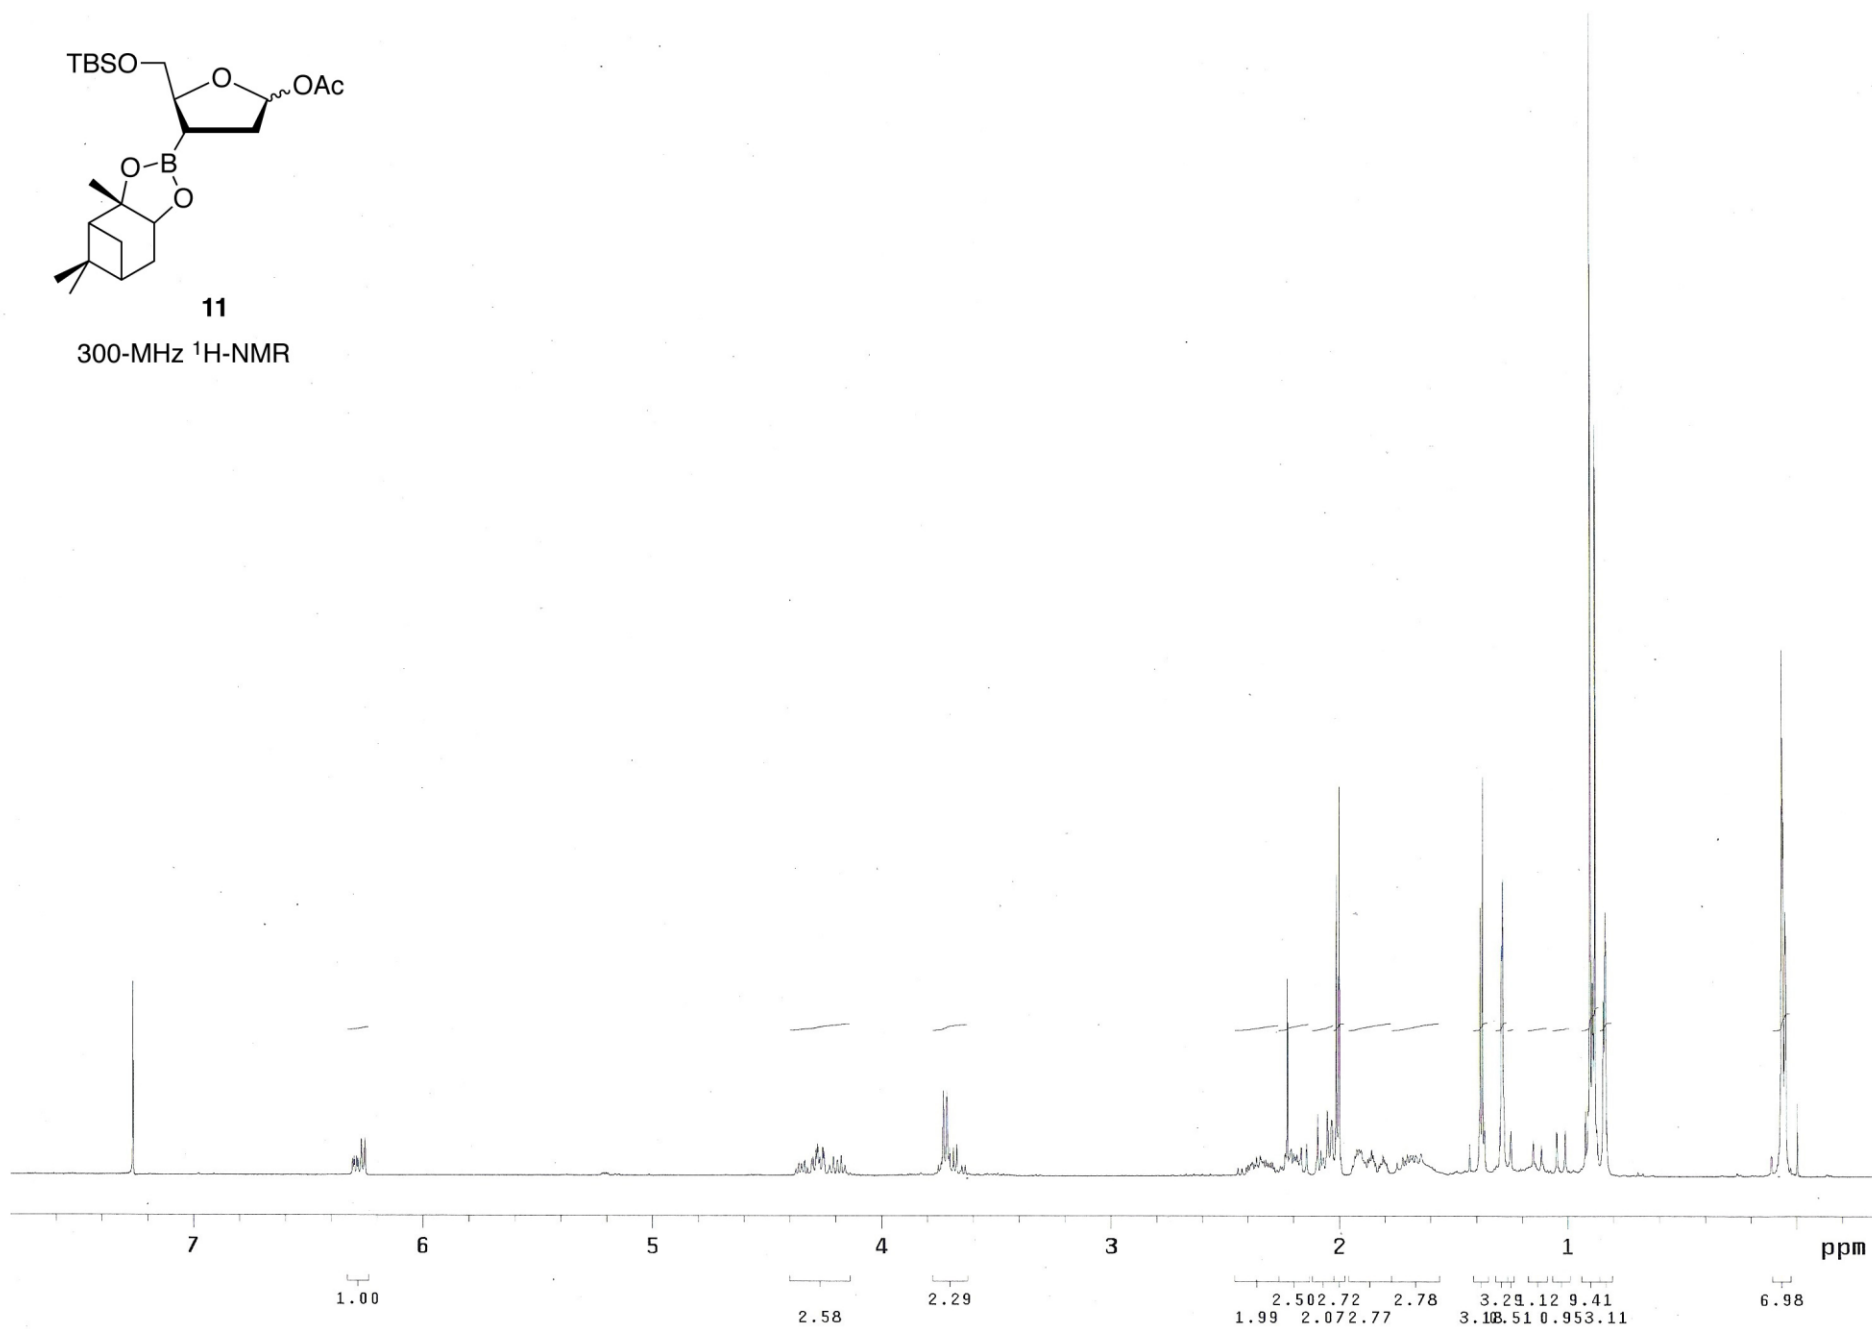

Deoxyribose boronate  
Acylated, w/o Thymine

exp3 s2pul

|             |            |            |          |
|-------------|------------|------------|----------|
| SAMPLE      |            | SPECIAL    |          |
| date        | Apr 9 2009 | temp       | not used |
| solvent     | CDC13      | gain       | not used |
| file        | exp        | spin       | not used |
| ACQUISITION |            | hst        | 0.008    |
| sw          | 18867.9    | pw90       | 9.700    |
| at          | 1.815      | alfa       | 20.000   |
| np          | 68492      | FLAGS      |          |
| fb          | 10400      | il         | n        |
| bs          | 16         | in         | n        |
| d1          | 1.000      | dp         | y        |
| nt          | 20000      | hs         | nn       |
| ct          | 14512      | PROCESSING |          |
| TRANSMITTER |            | lb         | 1.00     |
| tn          | C13        | fn         | not used |
| sfrq        | 75.479     | DISPLAY    |          |
| tof         | 737.5      | sp         | -1134.1  |
| tpwr        | 57         | wp         | 18867.9  |
| pw          | 4.850      | rfl        | 6962.7   |
| DECOUPLER   |            | rfp        | 5828.6   |
| dn          | H1         | rp         | 35.2     |
| dof         | 0          | lp         | -223.1   |
| dm          | yyy        | PLOT       |          |
| dmm         | w          | wc         | 250      |
| dpwr        | 37         | sc         | 0        |
| dmf         | 9100       | vs         | 153      |
|             |            | th         | 3        |
|             |            | nm         | no ph    |

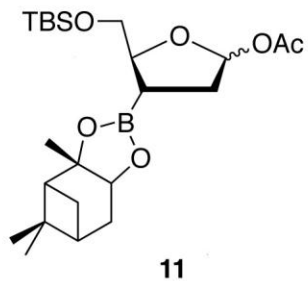

75-MHz  $^{13}\text{C}$ -NMR

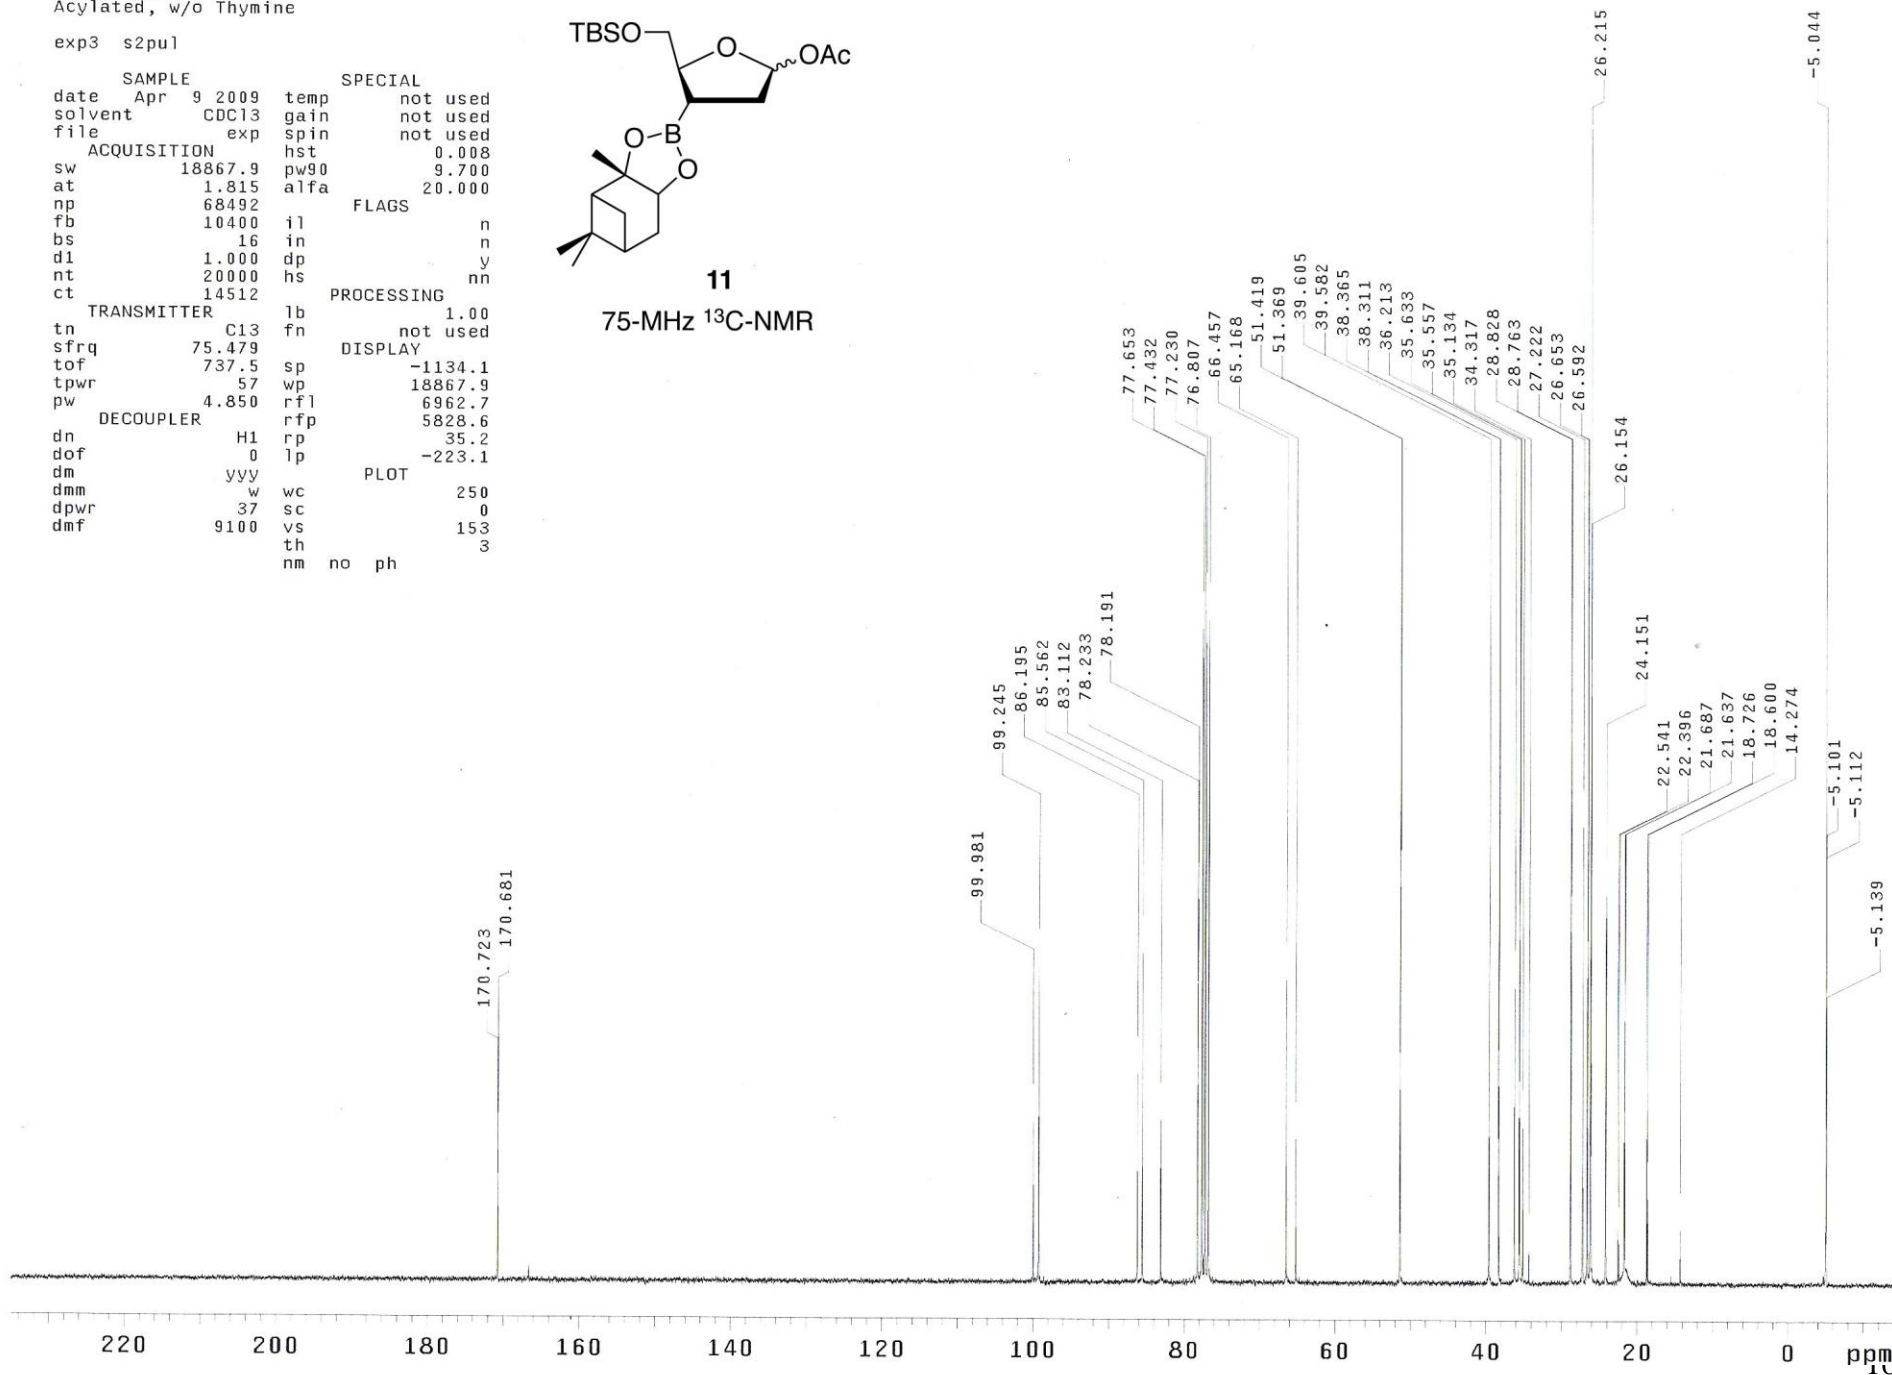

Silylated Thymidine boronate  
ab mixture

exp1 std1h

|             |            |            |          |
|-------------|------------|------------|----------|
| SAMPLE      |            | DEC. & VT  |          |
| date        | May 7 2009 | dfrq       | 300.144  |
| solvent     | CDCl3      | dn         | H1       |
| file        | exp        | dpwr       | 30       |
| ACQUISITION |            | dof        | 0        |
| sfrq        | 300.144    | dm         | nnn      |
| tn          | H1         | dmm        | c        |
| at          | 1.995      | dmf        | 200      |
| np          | 17984      | PROCESSING |          |
| sw          | 4506.5     | wtfile     | ft       |
| fb          | not used   | proc       | not used |
| bs          | 4          | fn         |          |
| tpwr        | 57         |            |          |
| pw          | 4.5        | werr       |          |
| dl          | 1.000      | wexp       |          |
| tof         | 0          | wbs        |          |
| nt          | 16         | wnt        |          |
| ct          | 16         |            |          |
| alock       | n          |            |          |
| gain        | not used   |            |          |
| FLAGS       |            |            |          |
| il          | n          |            |          |
| in          | n          |            |          |
| dp          | y          |            |          |
| DISPLAY     |            |            |          |
| sp          | -216.5     |            |          |
| wp          | 3344.9     |            |          |
| vs          | 152        |            |          |
| sc          | 0          |            |          |
| wc          | 250        |            |          |
| hzmm        | 13.38      |            |          |
| is          | 159.04     |            |          |
| rfl         | 754.0      |            |          |
| rfp         | 0          |            |          |
| th          | 2          |            |          |
| ins         | 1.000      |            |          |
| nm          | cdc ph     |            |          |

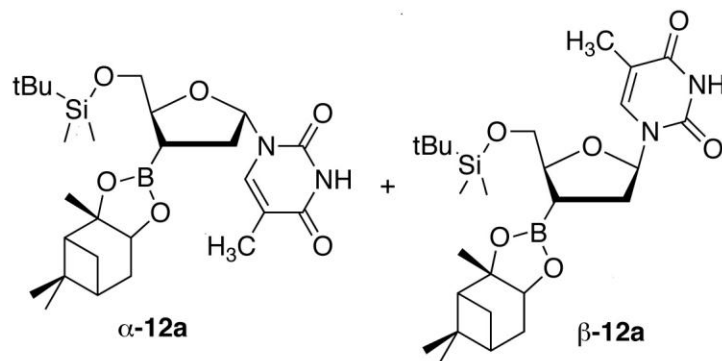

300-MHz <sup>1</sup>H-NMR

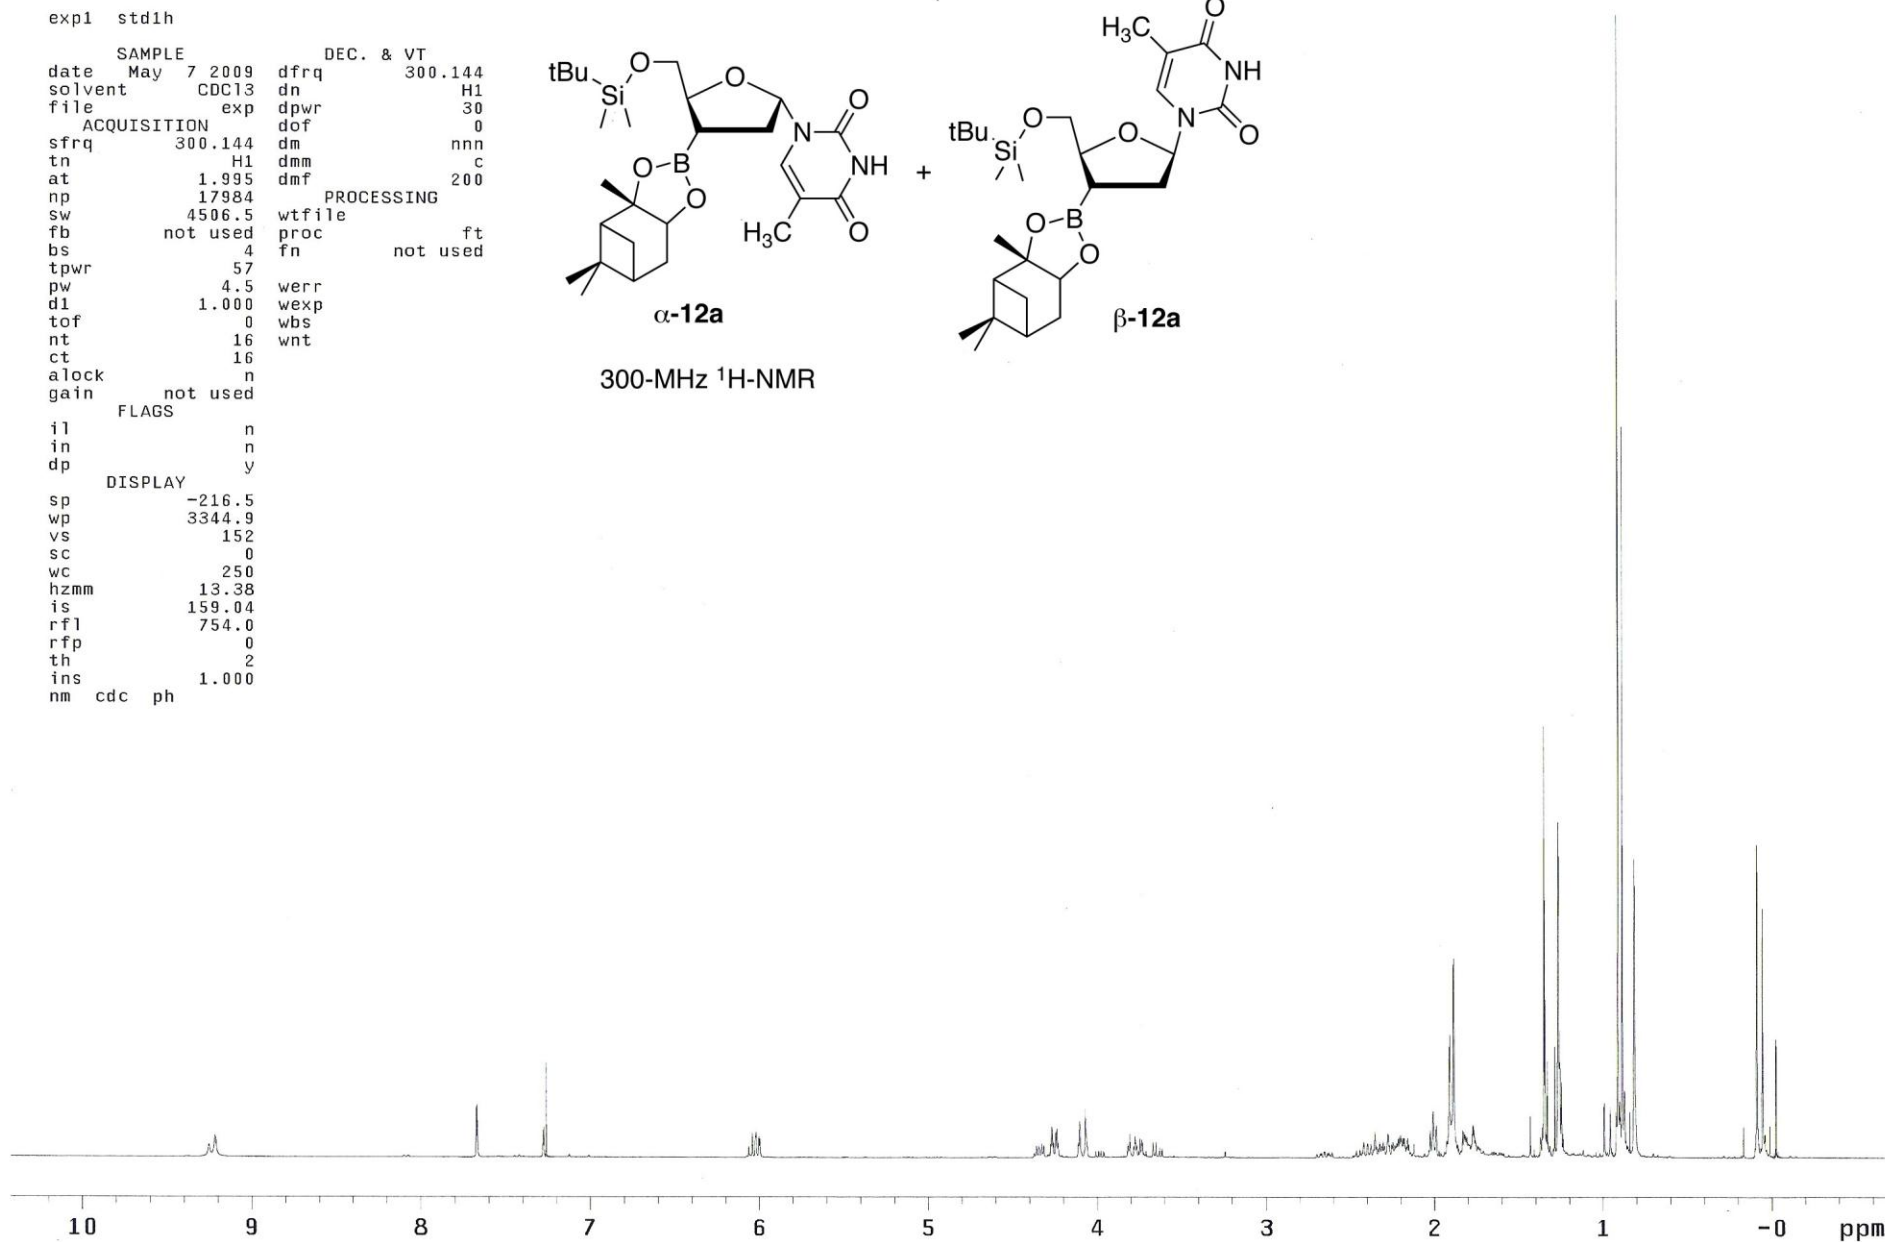

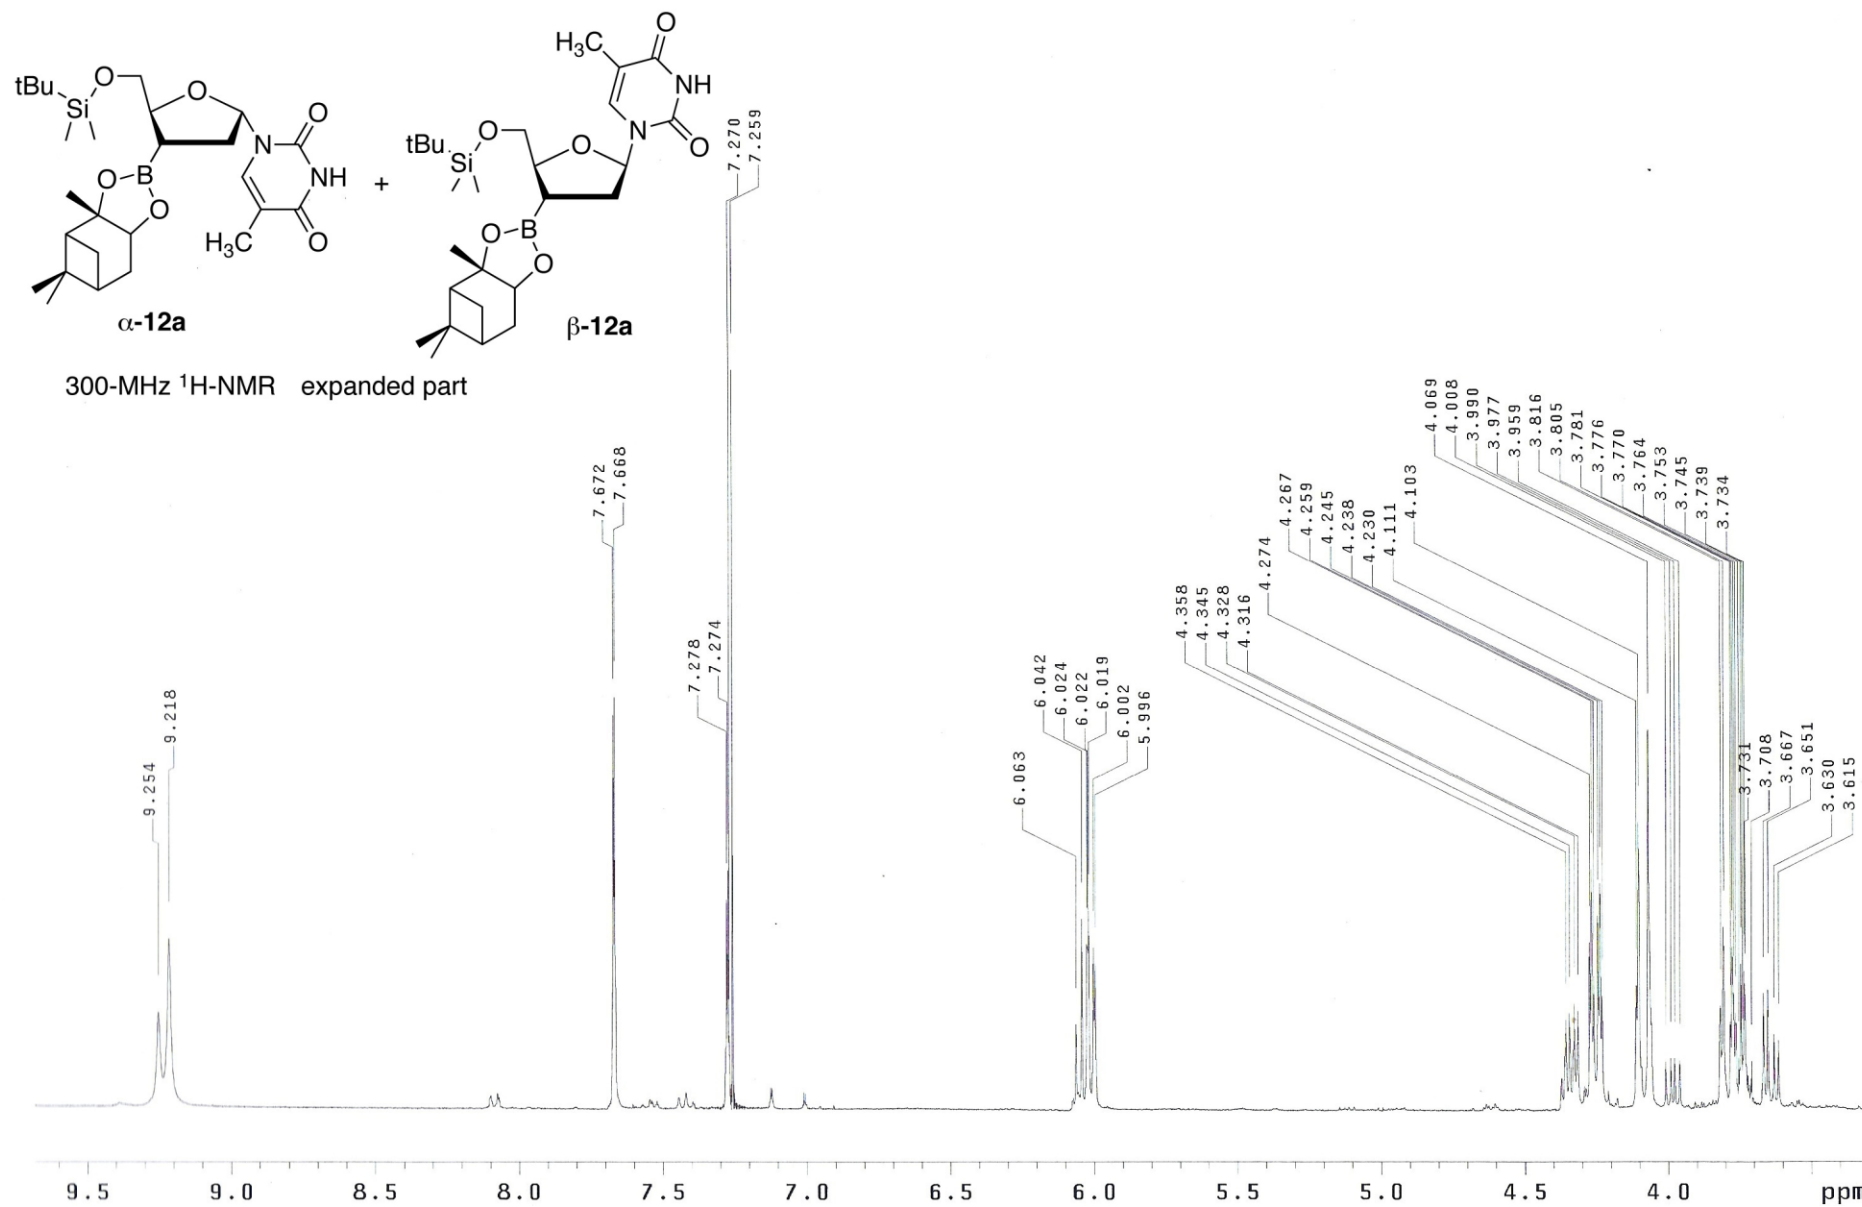

Silylated Thymidine BPab 13C

Archive directory: /export/home/kim/vnmrsys/data  
Sample directory: Deoxyribose\_B\_08Apr2009  
File: CARBON

Pulse Sequence: s2pu1

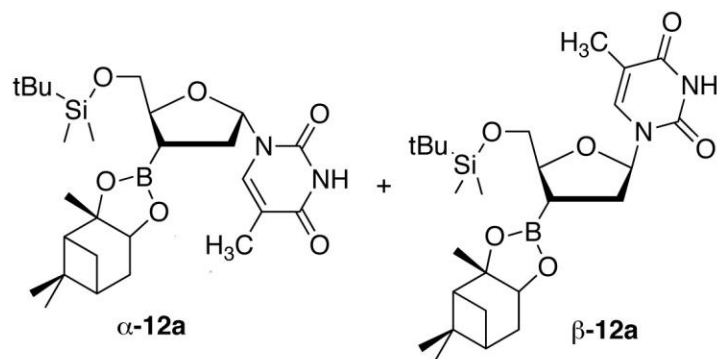

75-MHz  $^{13}\text{C}$ -NMR,  $\delta$  58 to 180 part

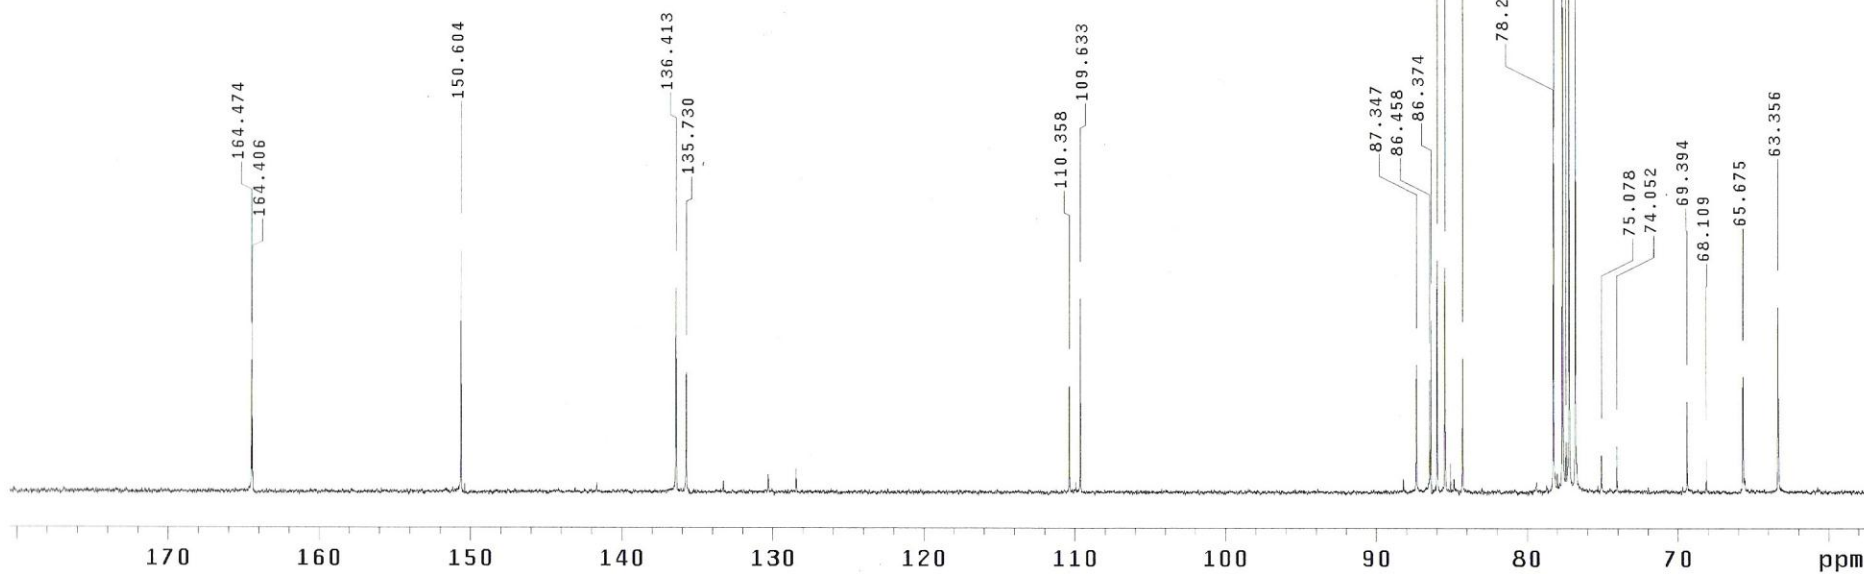

Silylated Thymidine BPab 13C

Archive directory: /export/home/kim/vnmrsys/data  
Sample directory: Deoxyribose\_B\_08Apr2009  
File: CARBON

Pulse Sequence: s2pu1

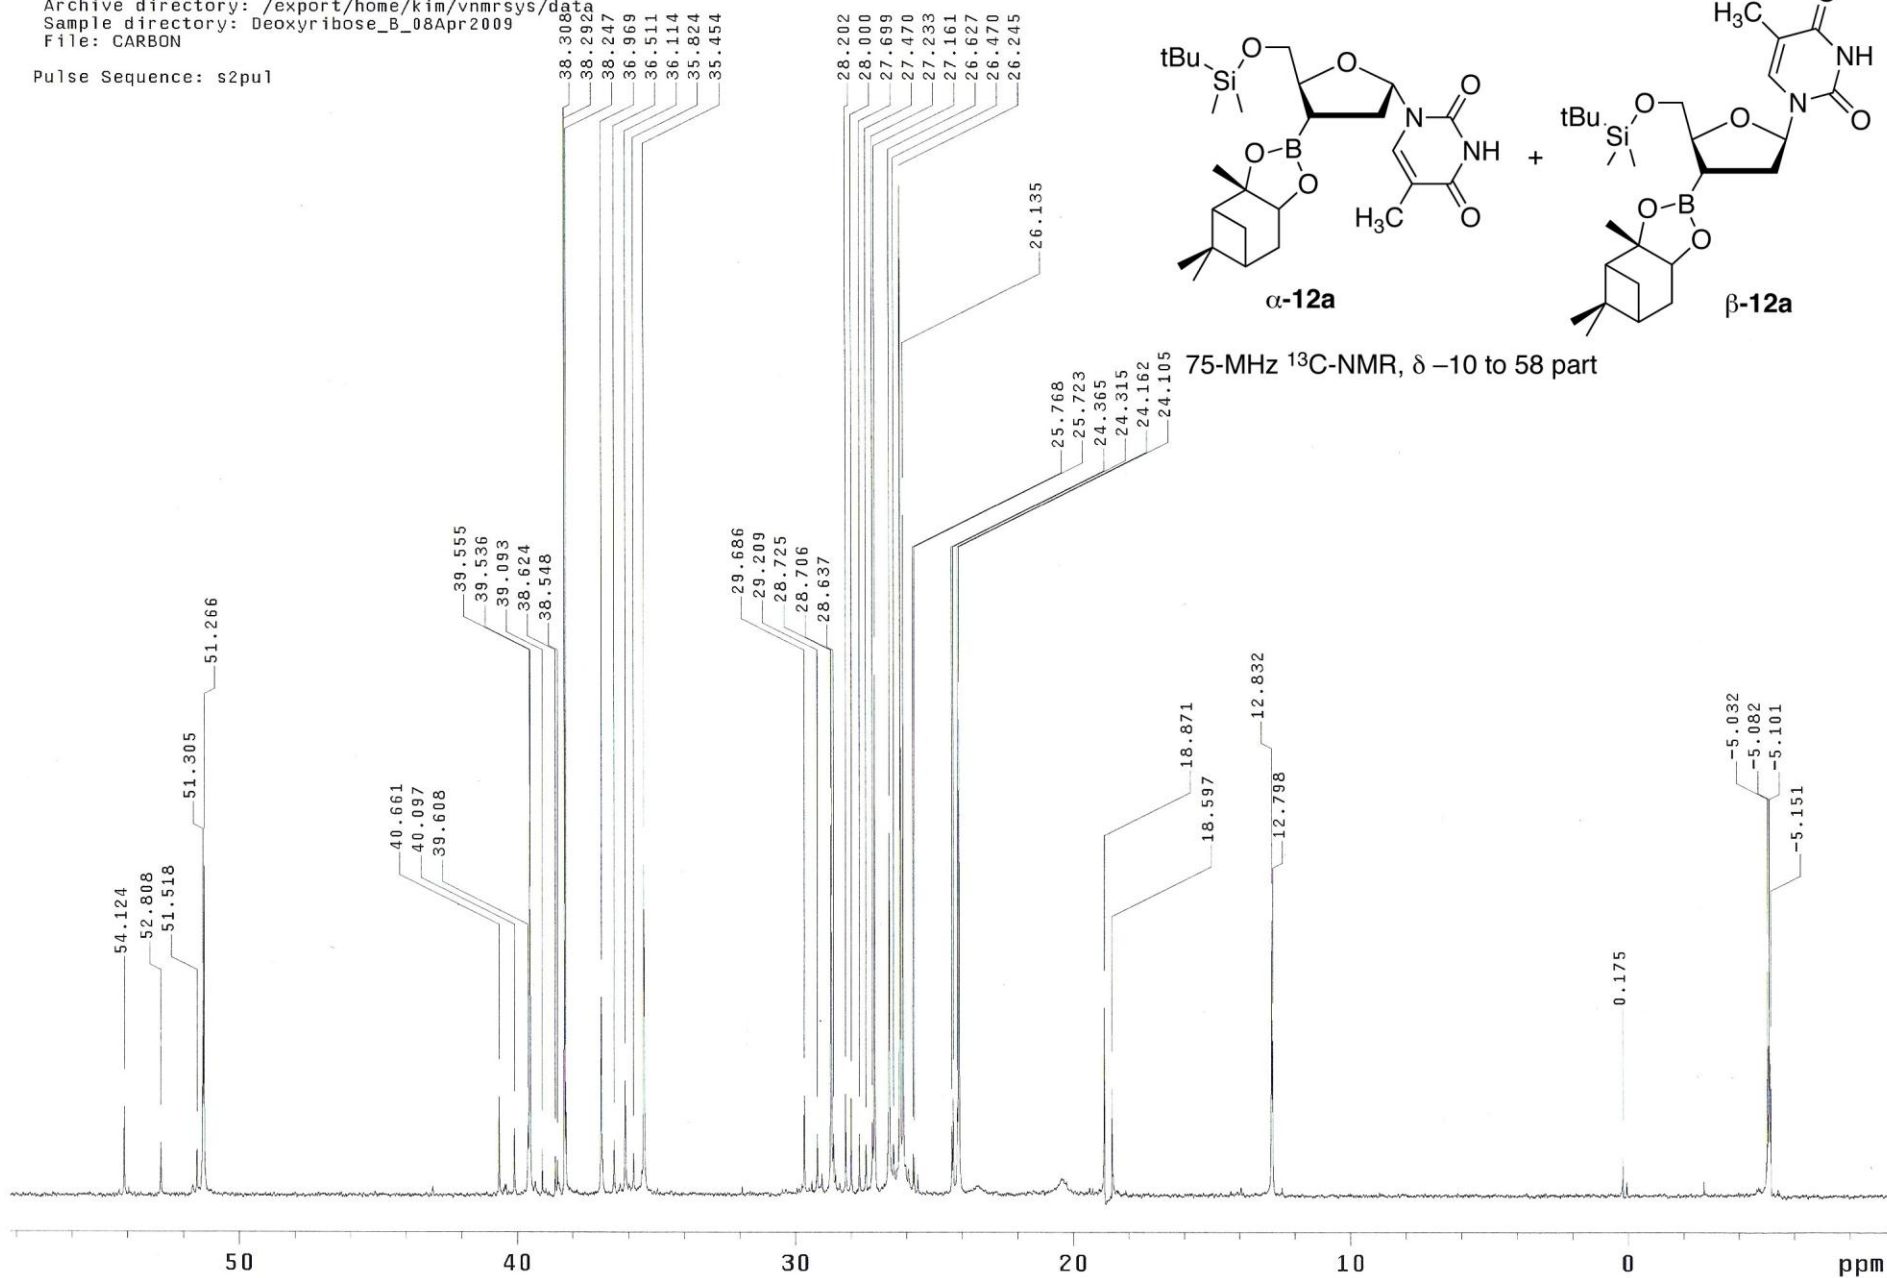

Sililated cytidine boronate

exp5 s2pu1

|             |             |            |          |
|-------------|-------------|------------|----------|
| SAMPLE      |             | SPECIAL    |          |
| date        | Oct 13 2009 | temp       | not used |
| solvent     | CD3OD       | gain       | not used |
| file        | exp         | spin       | not used |
| ACQUISITION |             | hst        | 0.008    |
| sw          | 4803.1      | pw90       | 9.800    |
| at          | 1.998       | alfa       | 20.000   |
| np          | 19192       | FLAGS      |          |
| fb          | not used    | il         | n        |
| bs          | 4           | in         | n        |
| d1          | 1.000       | dp         | y        |
| nt          | 16          | hs         | nn       |
| ct          | 16          | PROCESSING |          |
| TRANSMITTER |             | fn         | not used |
| tn          | H1          | DISPLAY    |          |
| sfrq        | 300.145     | sp         | -899.8   |
| tof         | 1.3         | wp         | 4803.1   |
| tpwr        | 57          | rfl        | 899.8    |
| pw          | 4.900       | rfp        | 0        |
| DECOUPLER   |             | rp         | 66.2     |
| dn          | C13         | lp         | -63.8    |
| dof         | 0           | PLOT       |          |
| dm          | nnn         | wc         | 250      |
| dmm         | c           | sc         | 0        |
| dpwr        | 39          | vs         | 48       |
| dmf         | 13100       | th         | 14       |
|             | ai          | cdc        | ph       |

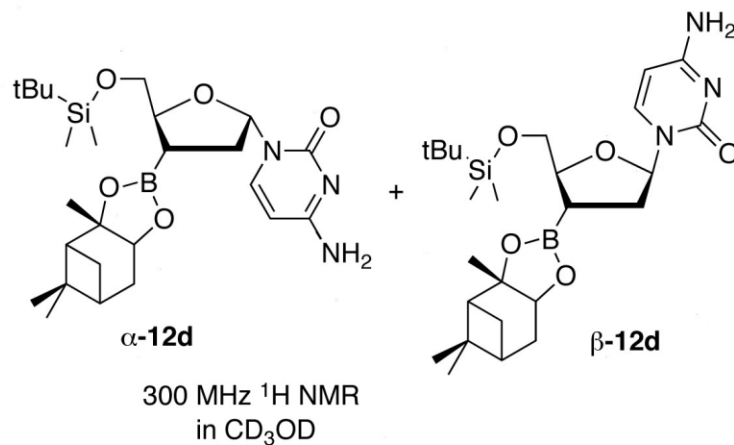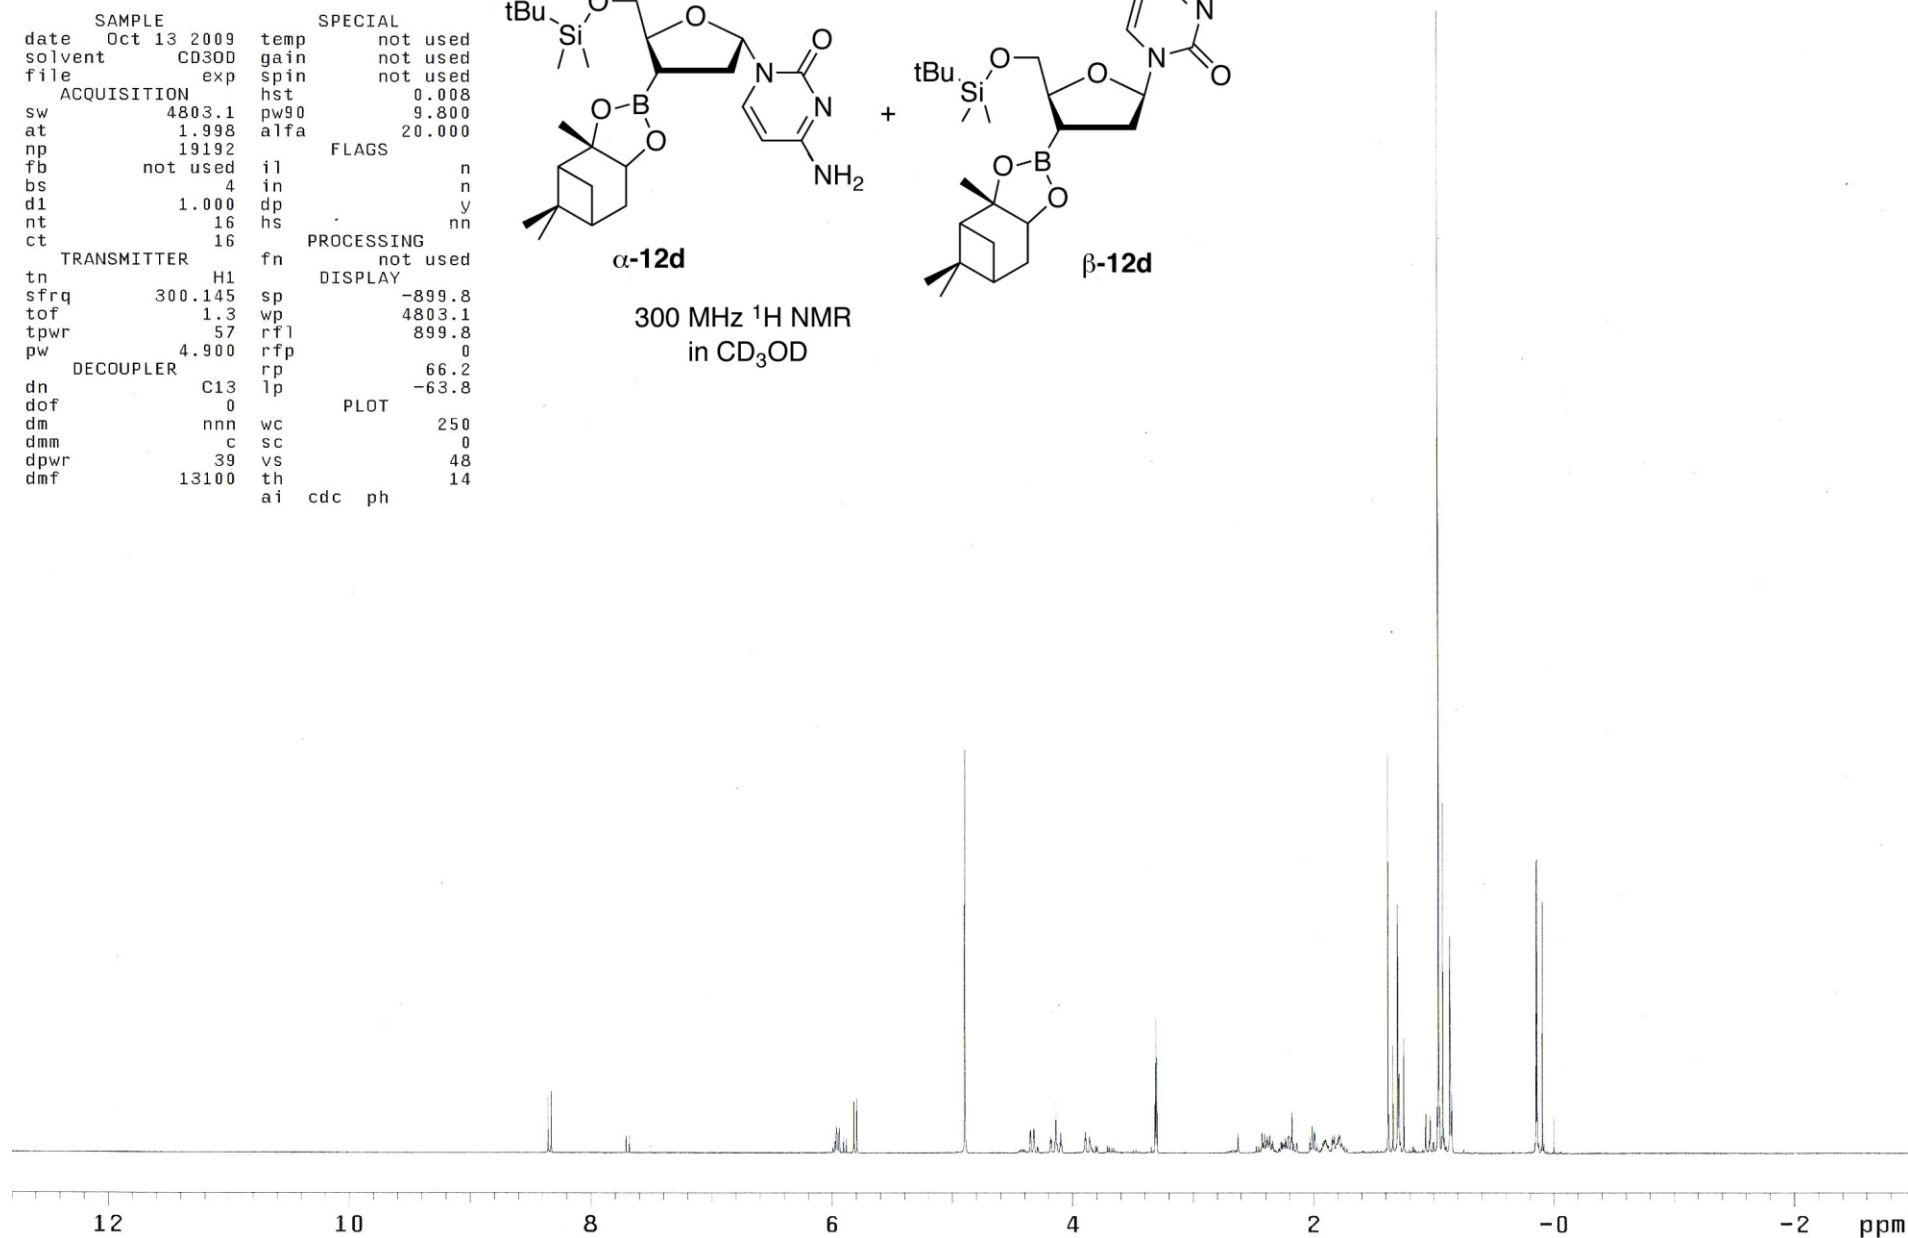

Silated cytidine boronate

Archive directory: /export/home/kim/vnmrsys/data  
Sample directory:  
File: PROTON

Pulse Sequence: s2pul

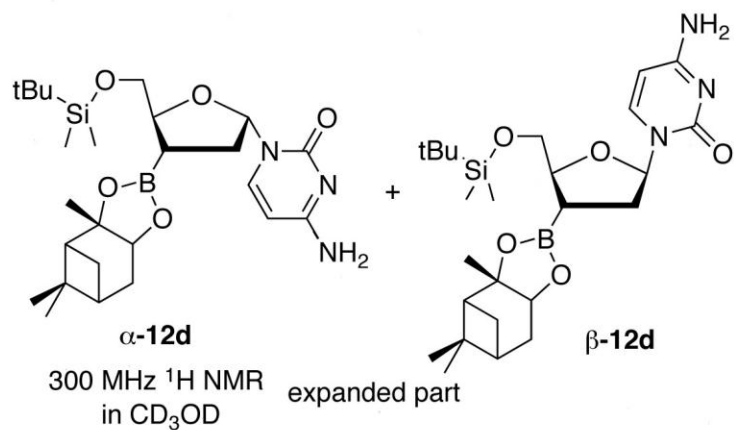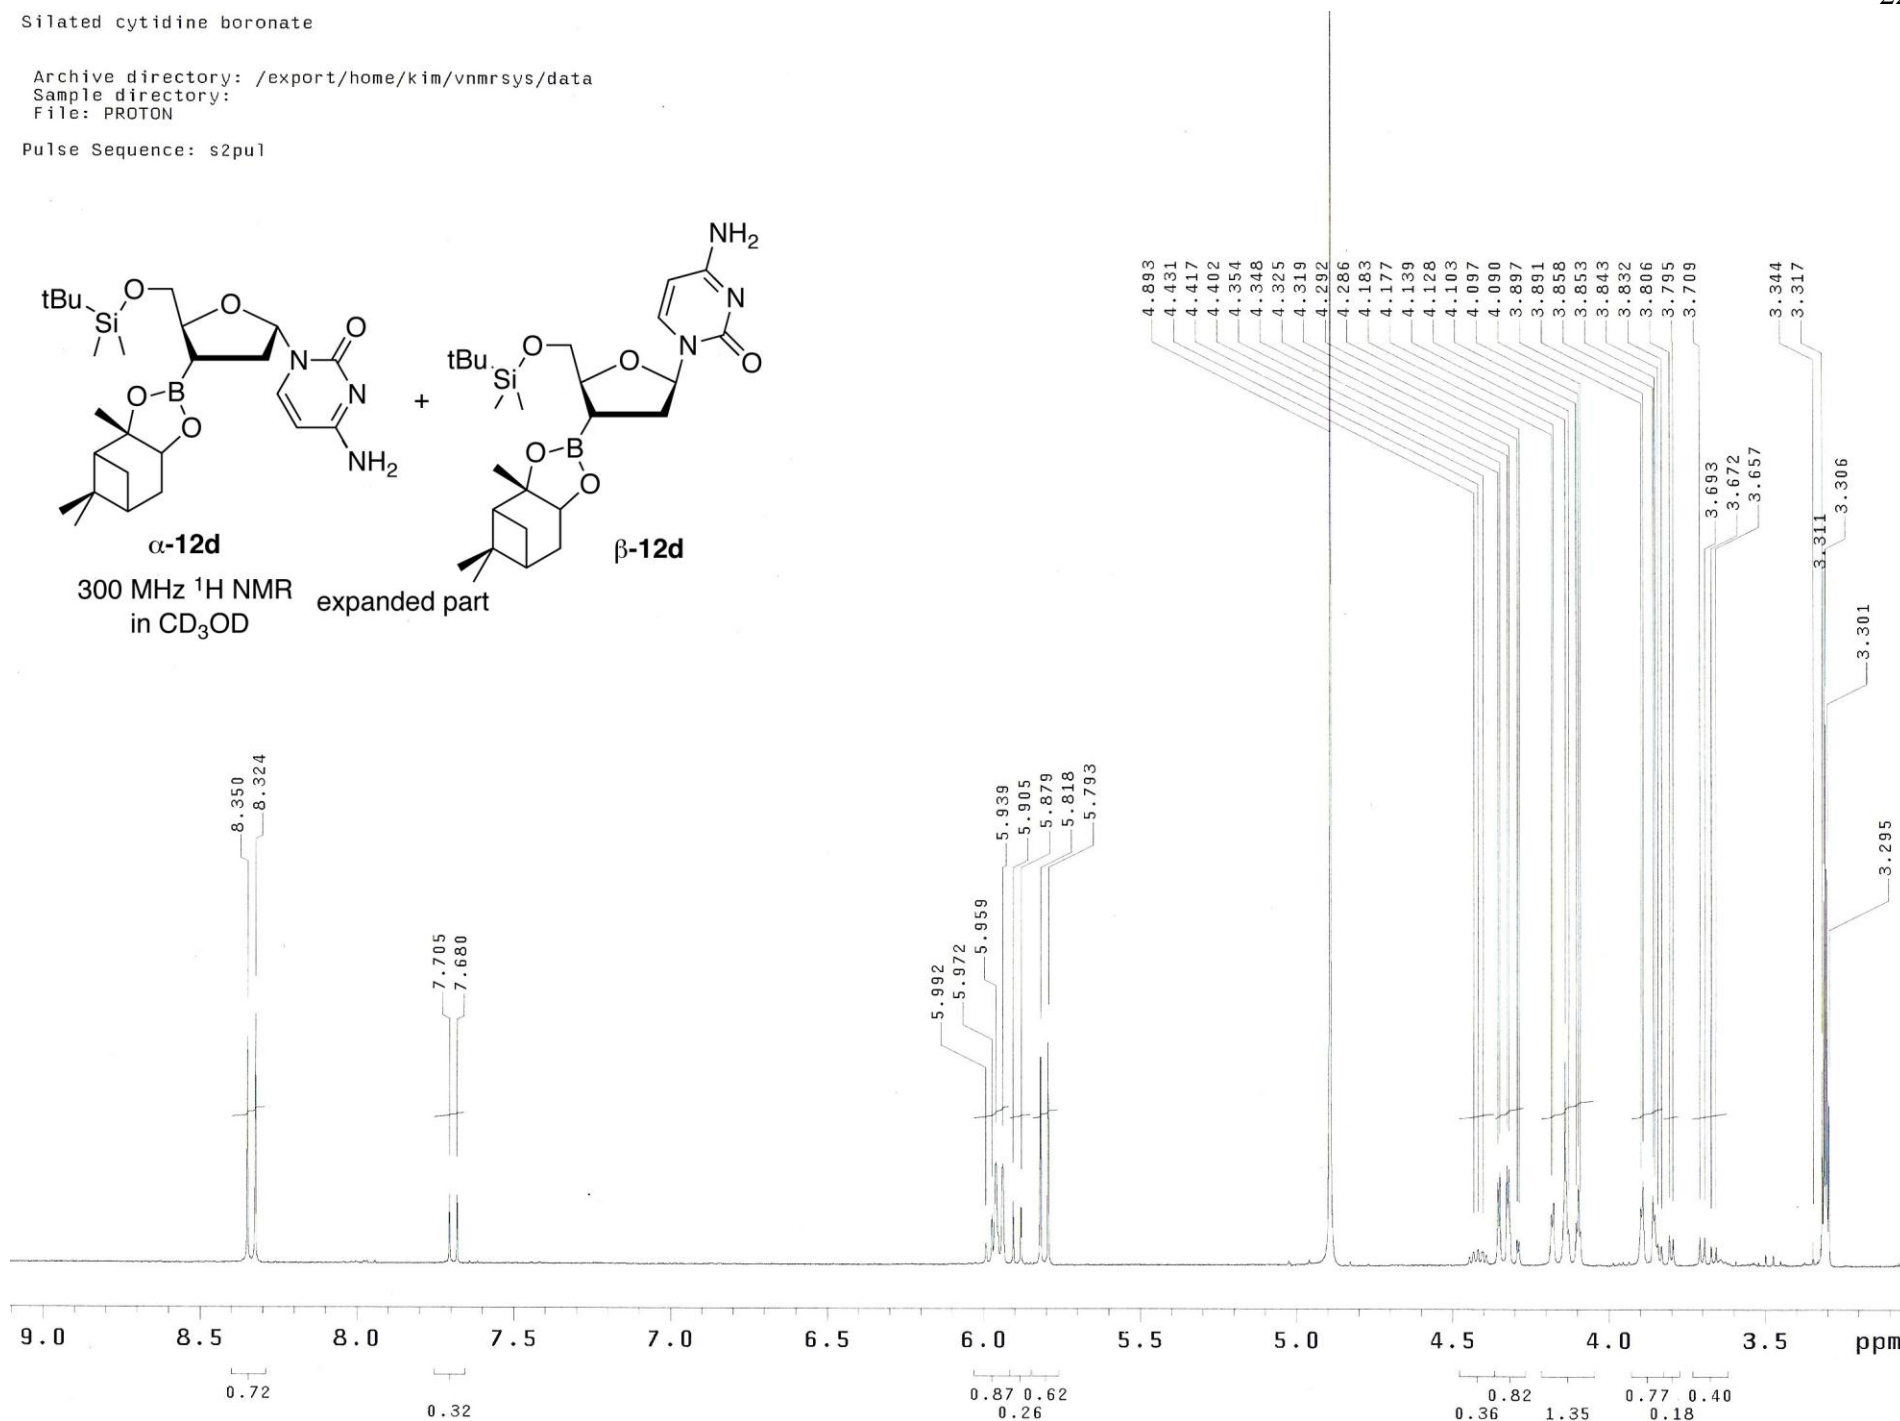

Deoxythymidine boronate  
b fraction, TMSBr treated

exptl std1h

|             |             |            |          |
|-------------|-------------|------------|----------|
| SAMPLE      |             | DEC. & VT  |          |
| date        | Apr 21 2009 | dfrq       | 300.144  |
| solvent     | CDC13       | dn         | H1       |
| file        | exp         | dpwr       | 30       |
| ACQUISITION |             | dof        | 0        |
| sfrq        | 300.144     | dm         | nnn      |
| tn          | H1          | dmm        | c        |
| at          | 1.995       | dmf        | 200      |
| np          | 17984       | PROCESSING |          |
| sw          | 4506.5      | wtfile     |          |
| fb          | not used    | proc       | ft       |
| bs          | 4           | fn         | not used |
| tpwr        | 57          |            |          |
| pw          | 4.5         | werr       |          |
| d1          | 1.000       | wexp       |          |
| tof         | 0           | wbs        |          |
| nt          | 16          | wnt        |          |
| ct          | 16          |            |          |
| alock       | n           |            |          |
| gain        | not used    |            |          |
| FLAGS       |             |            |          |
| il          | n           |            |          |
| in          | n           |            |          |
| dp          | y           |            |          |
| DISPLAY     |             |            |          |
| sp          | -128.5      |            |          |
| wp          | 2926.8      |            |          |
| vs          | 158         |            |          |
| sc          | 0           |            |          |
| wc          | 250         |            |          |
| hzmm        | 11.71       |            |          |
| is          | 114.53      |            |          |
| rfl         | 752.3       |            |          |
| rfp         | 0           |            |          |
| th          | 4           |            |          |
| ins         | 1.000       |            |          |
| nm          | cdc ph      |            |          |

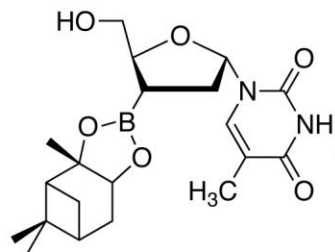

**$\alpha$ -13a**

300-MHz  $^1\text{H}$ -NMR

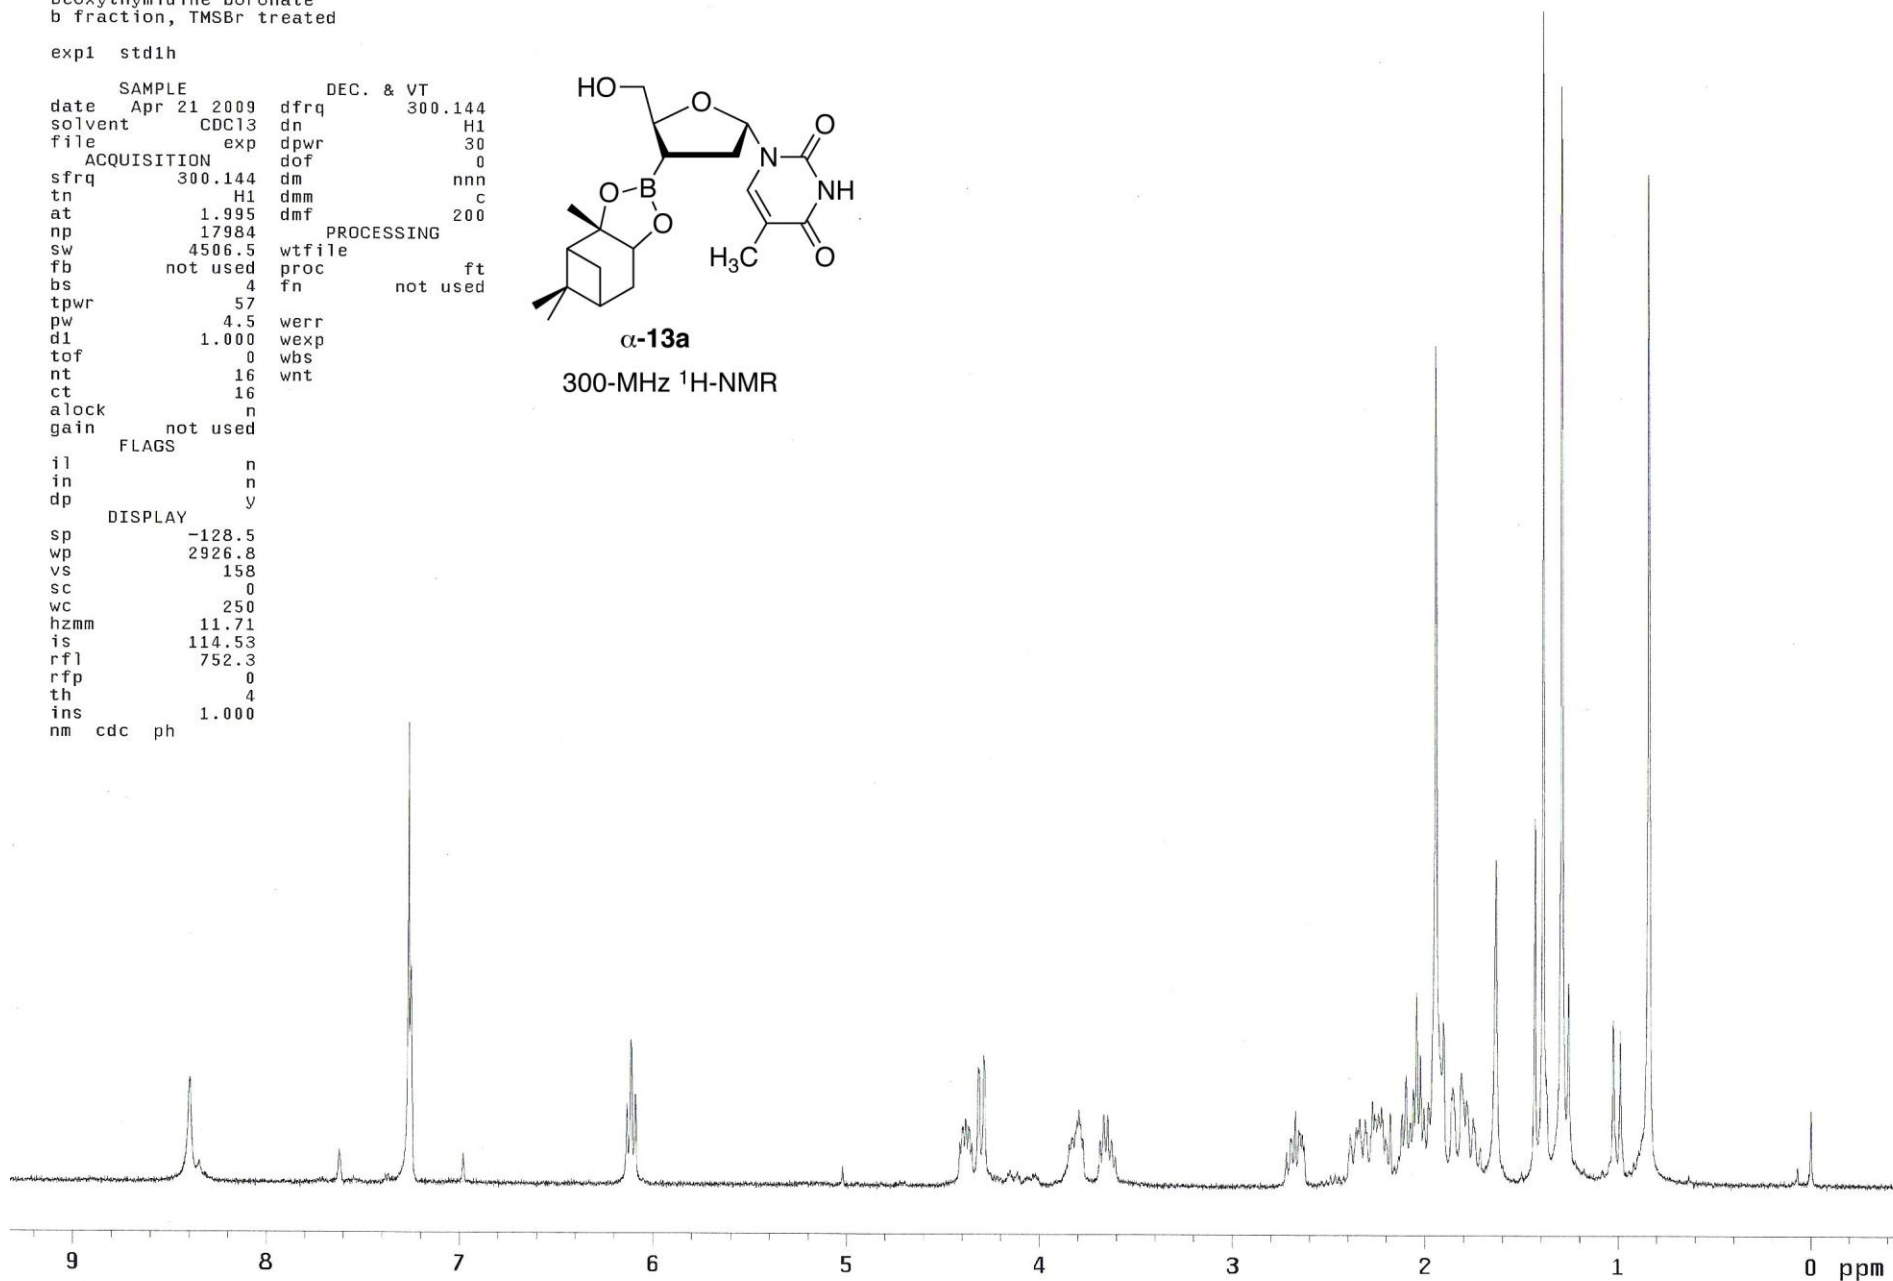

Deoxythymidine boronate  
b fraction, TMSOTf treated

Pulse Sequence: s2pu1

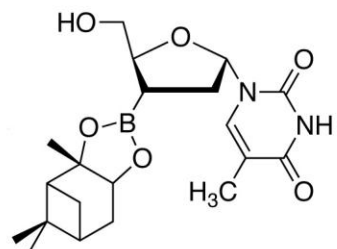

**$\alpha$ -13a**

300-MHz  $^1\text{H}$ -NMR  
expanded part

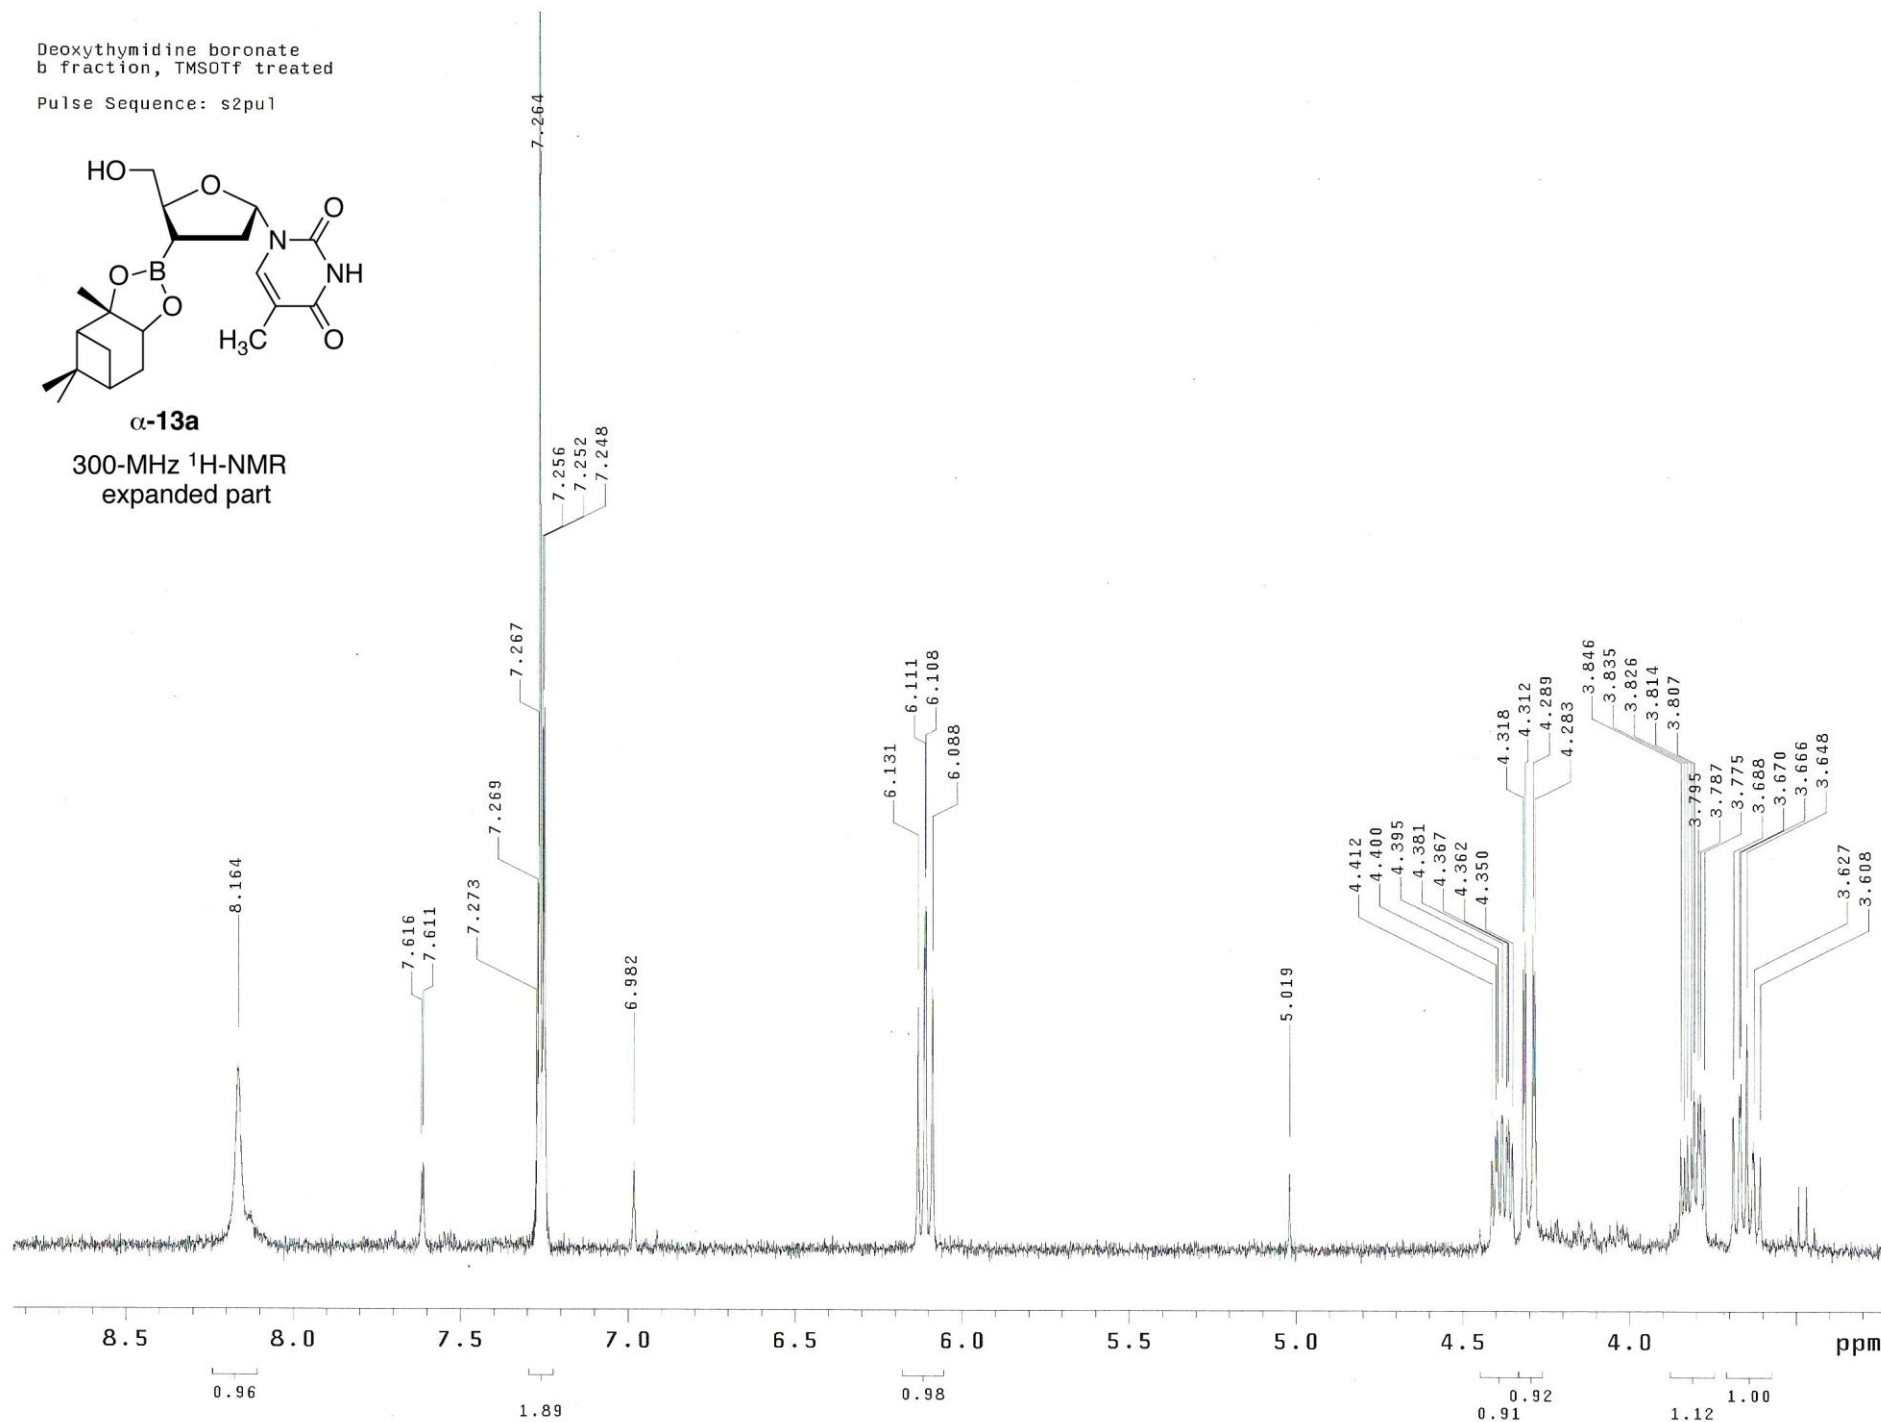

Thymidine boronat, <sup>13</sup>C  
Thymidine BP2\_C

exp3 s2pu1

|             |             |            |          |
|-------------|-------------|------------|----------|
| SAMPLE      |             | SPECIAL    |          |
| date        | Apr 30 2009 | temp       | not used |
| solvent     | CDC13       | gain       | not used |
| file        | exp         | spin       | not used |
| ACQUISITION |             | hst        | 0.008    |
| sw          | 18867.9     | pw90       | 9.700    |
| at          | 1.815       | alfa       | 20.000   |
| np          | 68492       | FLAGS      |          |
| fb          | 10400       | il         | n        |
| bs          | 16          | in         | n        |
| d1          | 1.000       | dp         | y        |
| nt          | 20000       | hs         | nn       |
| ct          | 14128       | PROCESSING |          |
| TRANSMITTER |             | lb         | 1.00     |
| tn          | C13         | fn         | not used |
| sfrq        | 75.479      | DISPLAY    |          |
| tof         | 737.5       | sp         | -1106.2  |
| tpwr        | 57          | wp         | 15394.3  |
| pw          | 4.850       | rfl        | 6962.4   |
| DECOUPLER   |             | rfp        | 5828.6   |
| dn          | H1          | rp         | 31.6     |
| dof         | 0           | lp         | -216.0   |
|             |             | PLOT       |          |
| dmm         | yyy         | wc         | 250      |
| dpwr        | 37          | sc         | 0        |
| dmf         | 9100        | vs         | 162      |
|             |             | th         | 5        |
|             |             | nm         | no ph    |

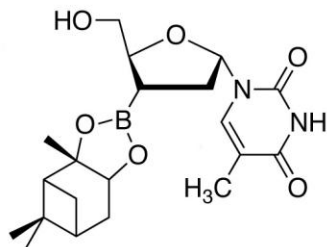

$\alpha$ -13a  
75-MHz <sup>13</sup>C-NMR

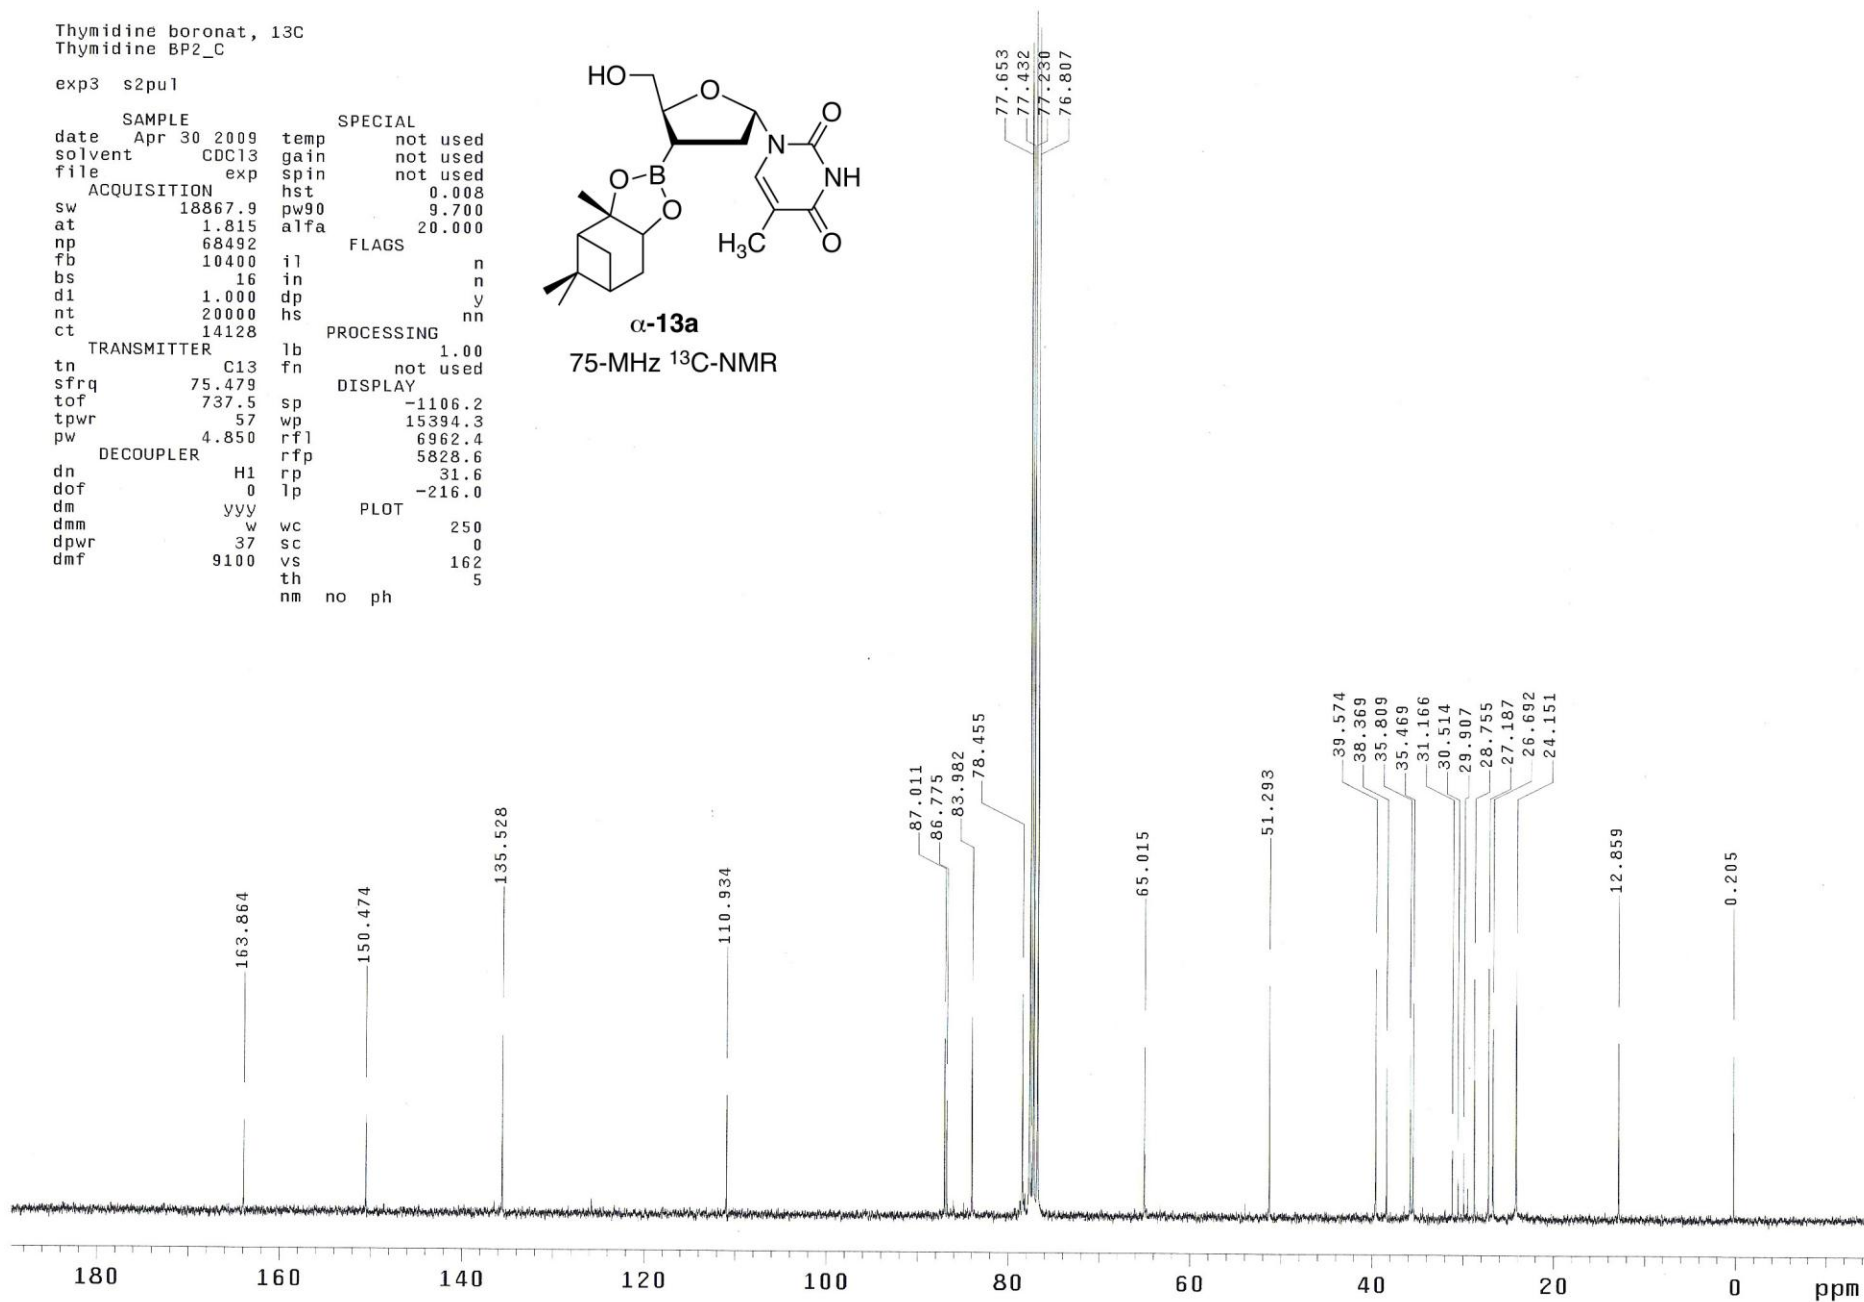

Thymidine boronate  
Thymidine BP\_Hab

exp1 std1h

|             |             |            |          |
|-------------|-------------|------------|----------|
| SAMPLE      |             | DEC. & VT  |          |
| date        | Apr 27 2009 | dfrq       | 300.144  |
| solvent     | CDC13       | dn         | H1       |
| file        | exp         | dpwr       | 30       |
| ACQUISITION |             | dof        | 0        |
| sfrq        | 300.144     | dm         | nnn      |
| tn          | H1          | dmm        | c        |
| at          | 1.995       | dmf        | 200      |
| np          | 17984       | PROCESSING |          |
| sw          | 4506.5      | wtfile     |          |
| fb          | not used    | proc       | ft       |
| bs          | 4           | fn         | not used |
| tpwr        | 57          |            |          |
| pw          | 4.5         | werr       |          |
| dl          | 1.000       | wexp       |          |
| tof         | 0           | wbs        |          |
| nt          | 16          | wnt        |          |
| ct          | 16          |            |          |
| alock       | n           |            |          |
| gain        | not used    |            |          |
| FLAGS       |             |            |          |
| il          | n           |            |          |
| in          | n           |            |          |
| dp          | y           |            |          |
| DISPLAY     |             |            |          |
| sp          | -118.6      |            |          |
| wp          | 3092.7      |            |          |
| vs          | 162         |            |          |
| sc          | 0           |            |          |
| wc          | 250         |            |          |
| hzmm        | 12.37       |            |          |
| is          | 114.53      |            |          |
| rfl         | 749.0       |            |          |
| rfp         | 0           |            |          |
| th          | 4           |            |          |
| ins         | 1.000       |            |          |
| nm          | cdc ph      |            |          |

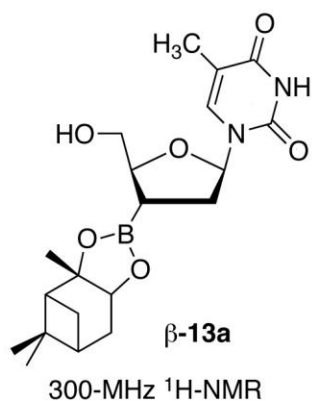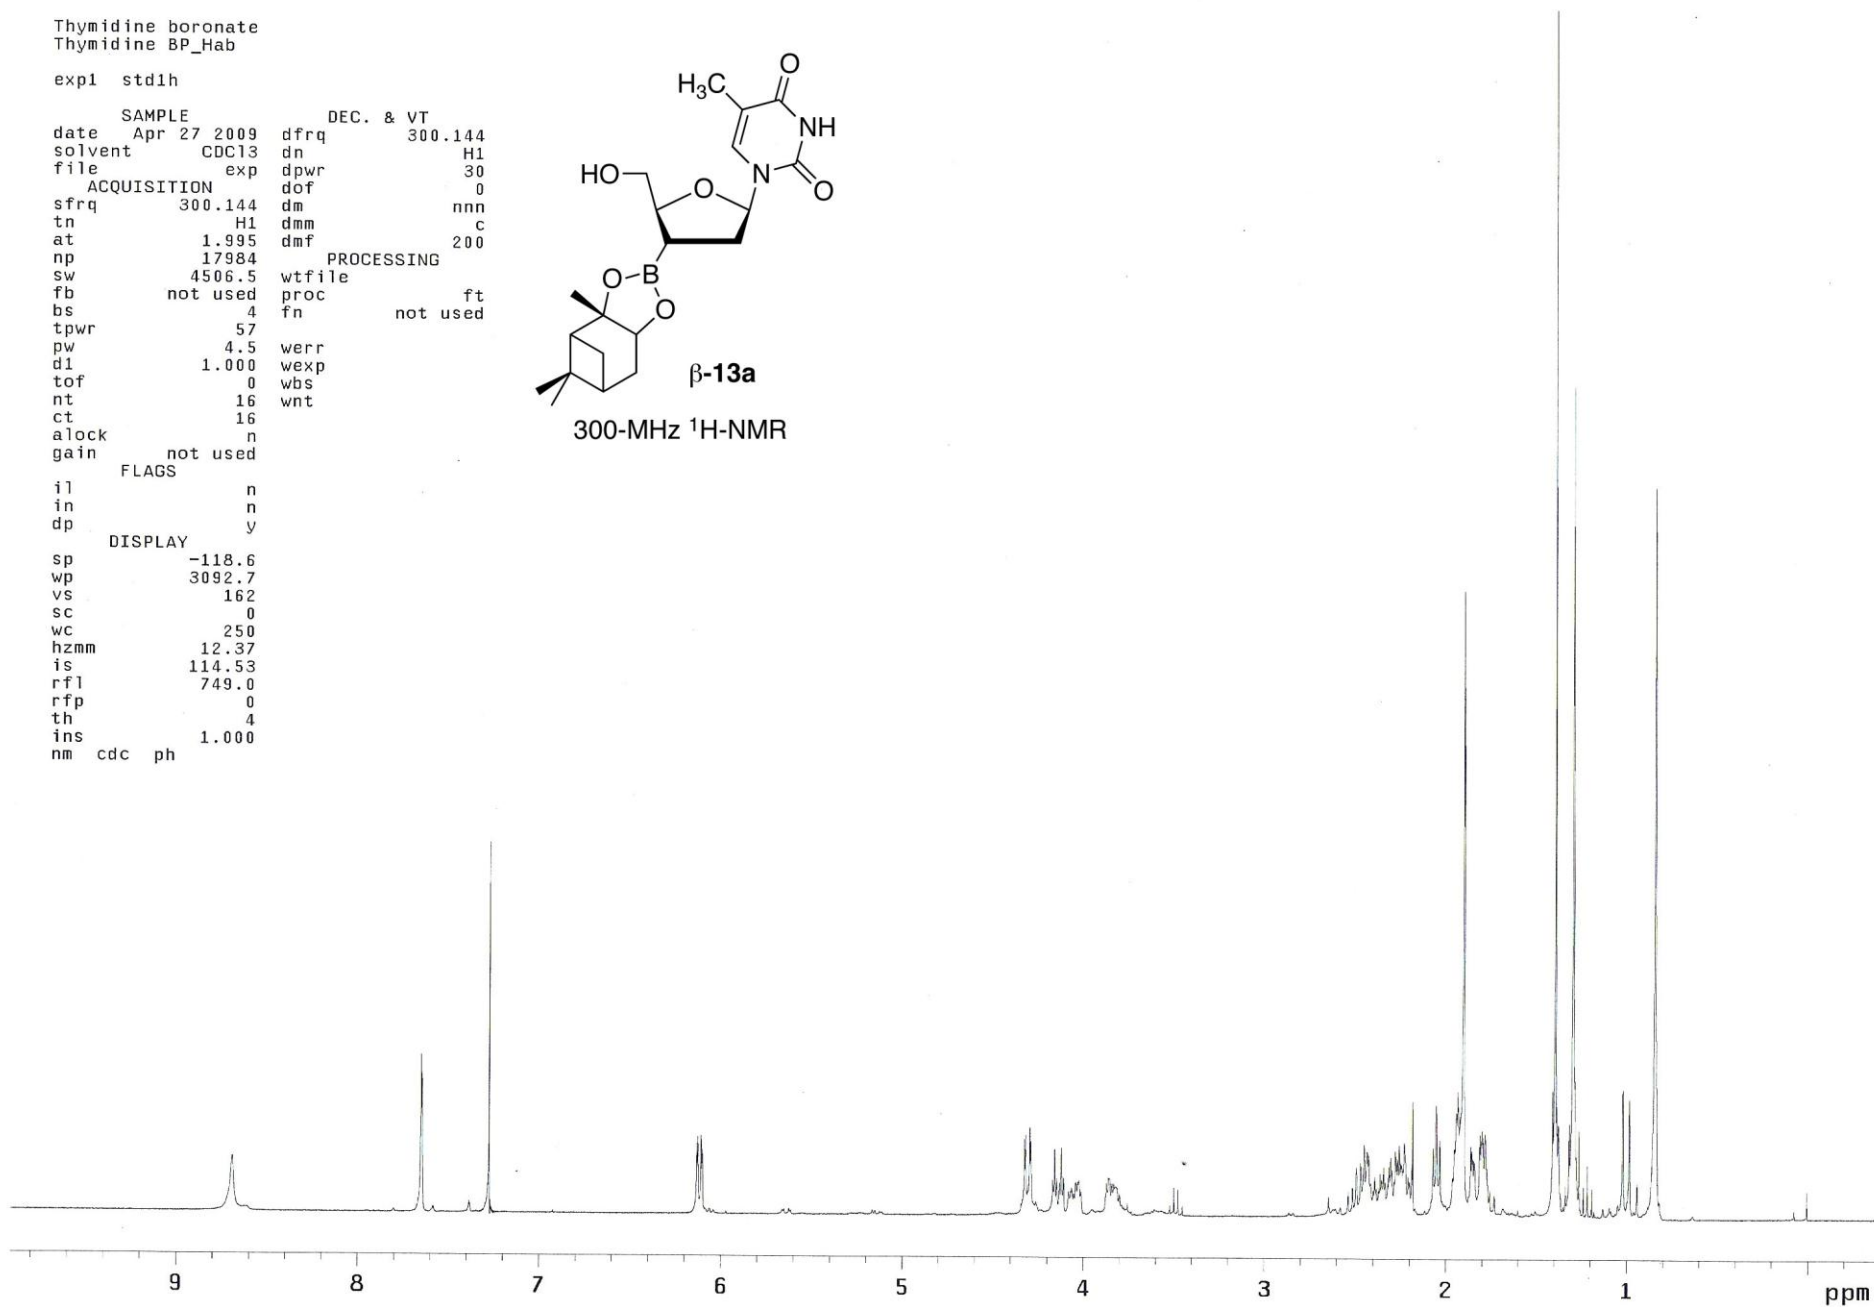

Deoxythymidine boronate  
a fraction, TMSOTf treated

Pulse Sequence: s2pu1

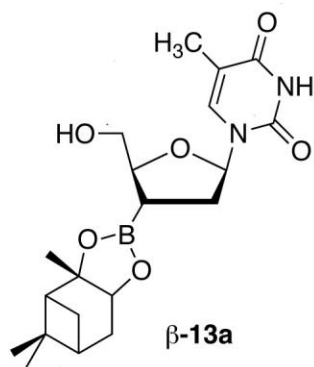

300-MHz  $^1\text{H}$ -NMR  
expanded part

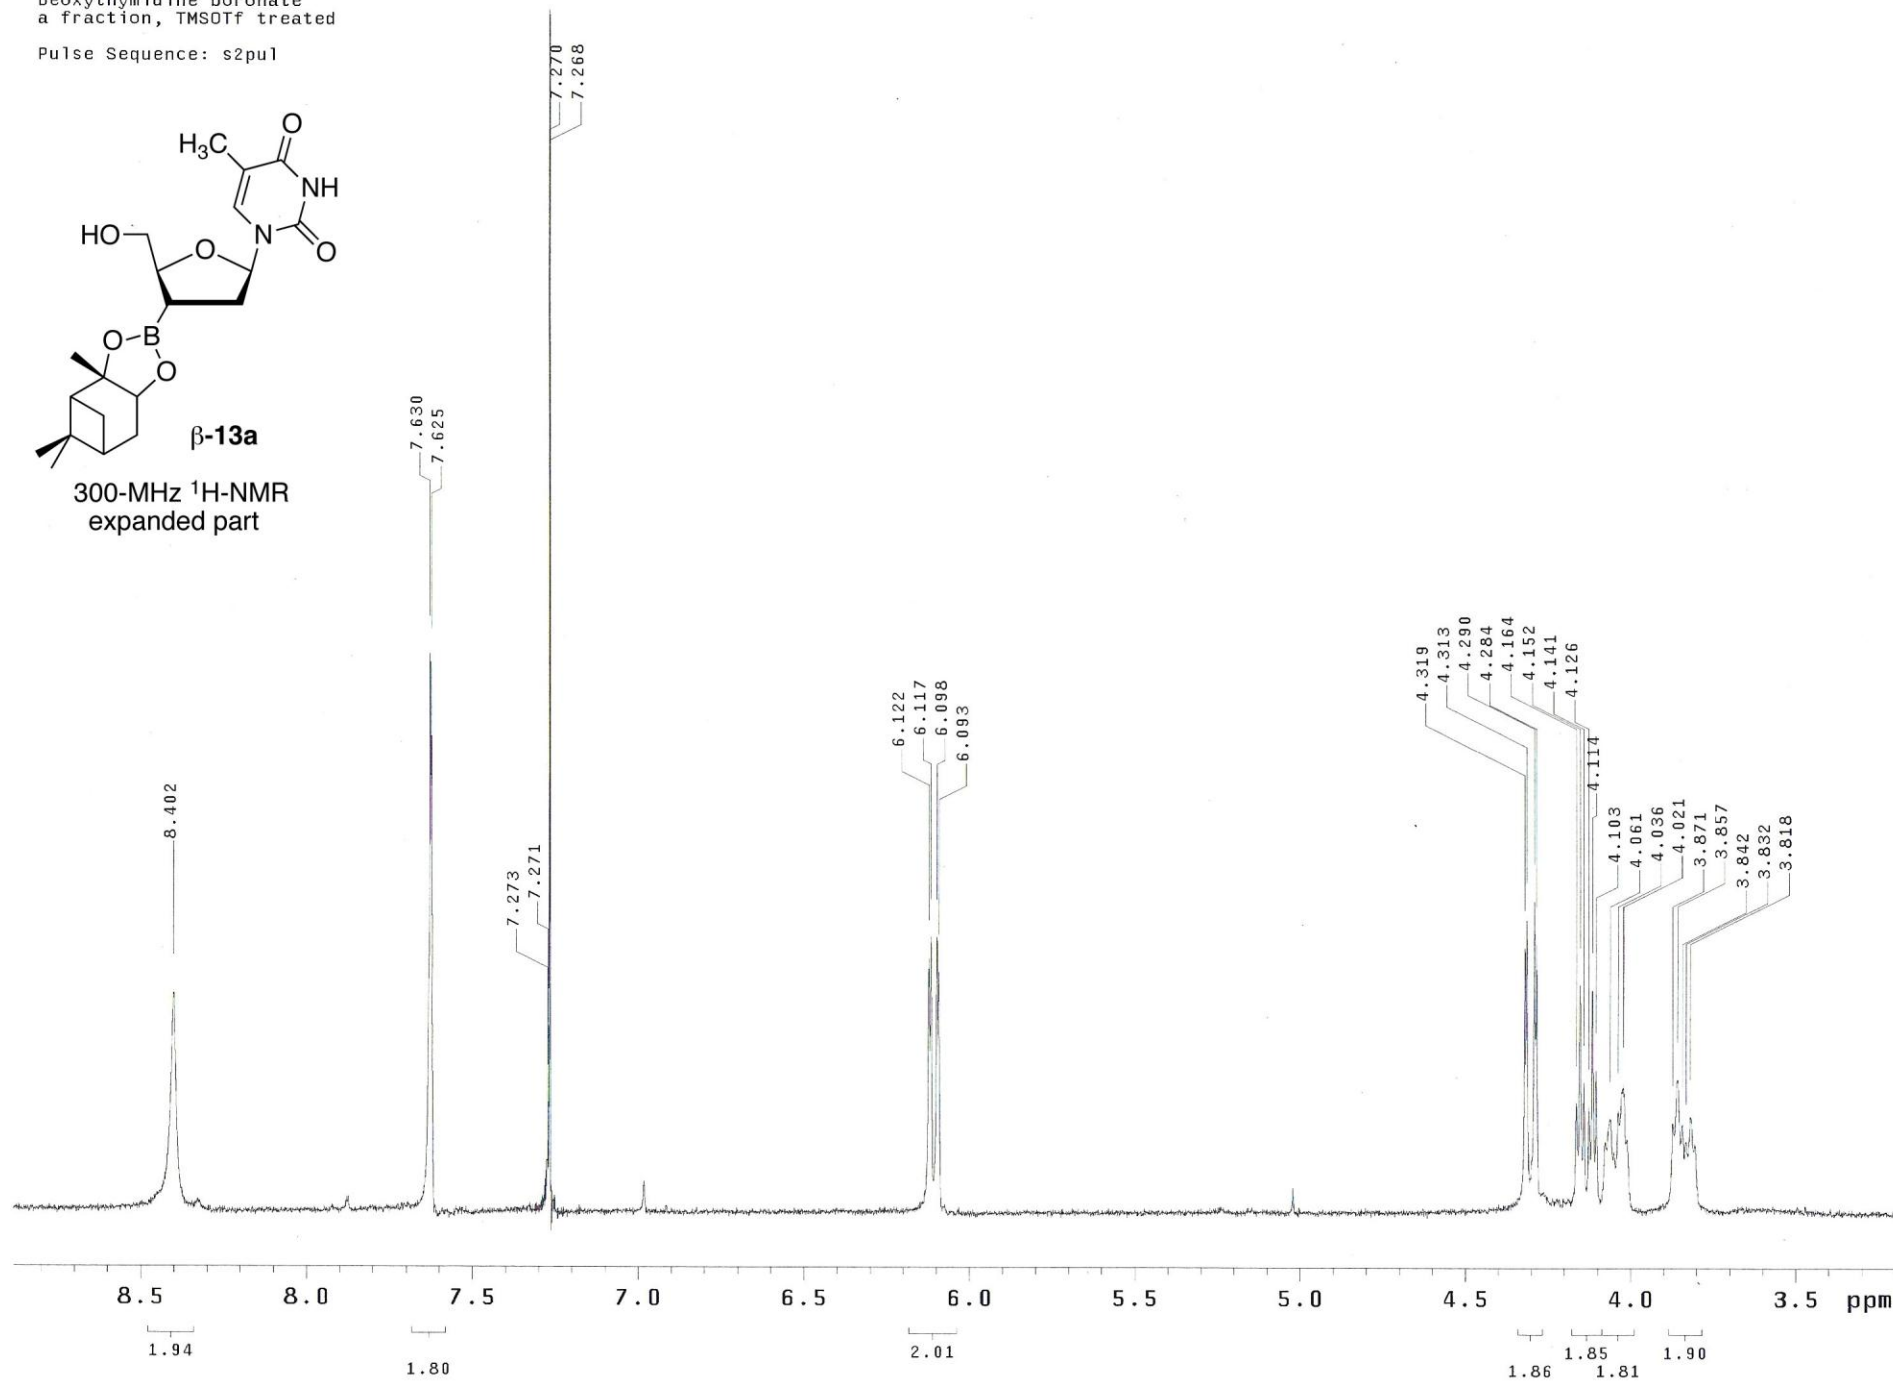

Thymidine boronat, <sup>13</sup>C  
Thymidine BP\_Ca

exp3 s2pu1

|             |                   |            |          |
|-------------|-------------------|------------|----------|
| SAMPLE      |                   | SPECIAL    |          |
| date        | Apr 24 2009       | temp       | not used |
| solvent     | CDCl <sub>3</sub> | gain       | not used |
| file        | exp               | spin       | not used |
| ACQUISITION |                   | hst        | 0.008    |
| sw          | 18867.9           | pw90       | 9.700    |
| at          | 1.815             | alfa       | 20.000   |
| np          | 68492             | FLAGS      |          |
| fb          | 10400             | il         | n        |
| bs          | 16                | in         | n        |
| d1          | 1.000             | dp         | y        |
| nt          | 20000             | hs         | nn       |
| ct          | 15952             | PROCESSING |          |
| TRANSMITTER |                   | lb         | 1.00     |
| tn          | C13               | fn         | not used |
| sfrq        | 75.479            | DISPLAY    |          |
| tof         | 737.5             | sp         | -1135.3  |
| tpwr        | 57                | wp         | 18867.9  |
| pw          | 4.850             | rfl        | 6963.9   |
| DECOUPLER   |                   | rfp        | 5828.6   |
| dn          | H1                | rp         | 47.2     |
| dof         | 0                 | lp         | -251.3   |
| dm          | yyy               | PLOT       |          |
| dmm         | w                 | wc         | 250      |
| dpwr        | 37                | sc         | 0        |
| dmf         | 9100              | vs         | 133      |
|             |                   | th         | 8        |
|             |                   | nm         | no ph    |

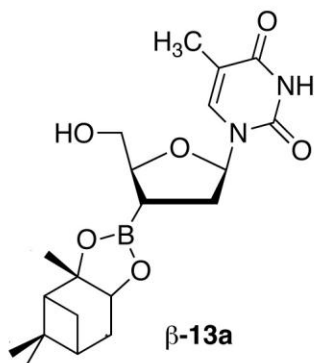

75-MHz <sup>13</sup>C-NMR

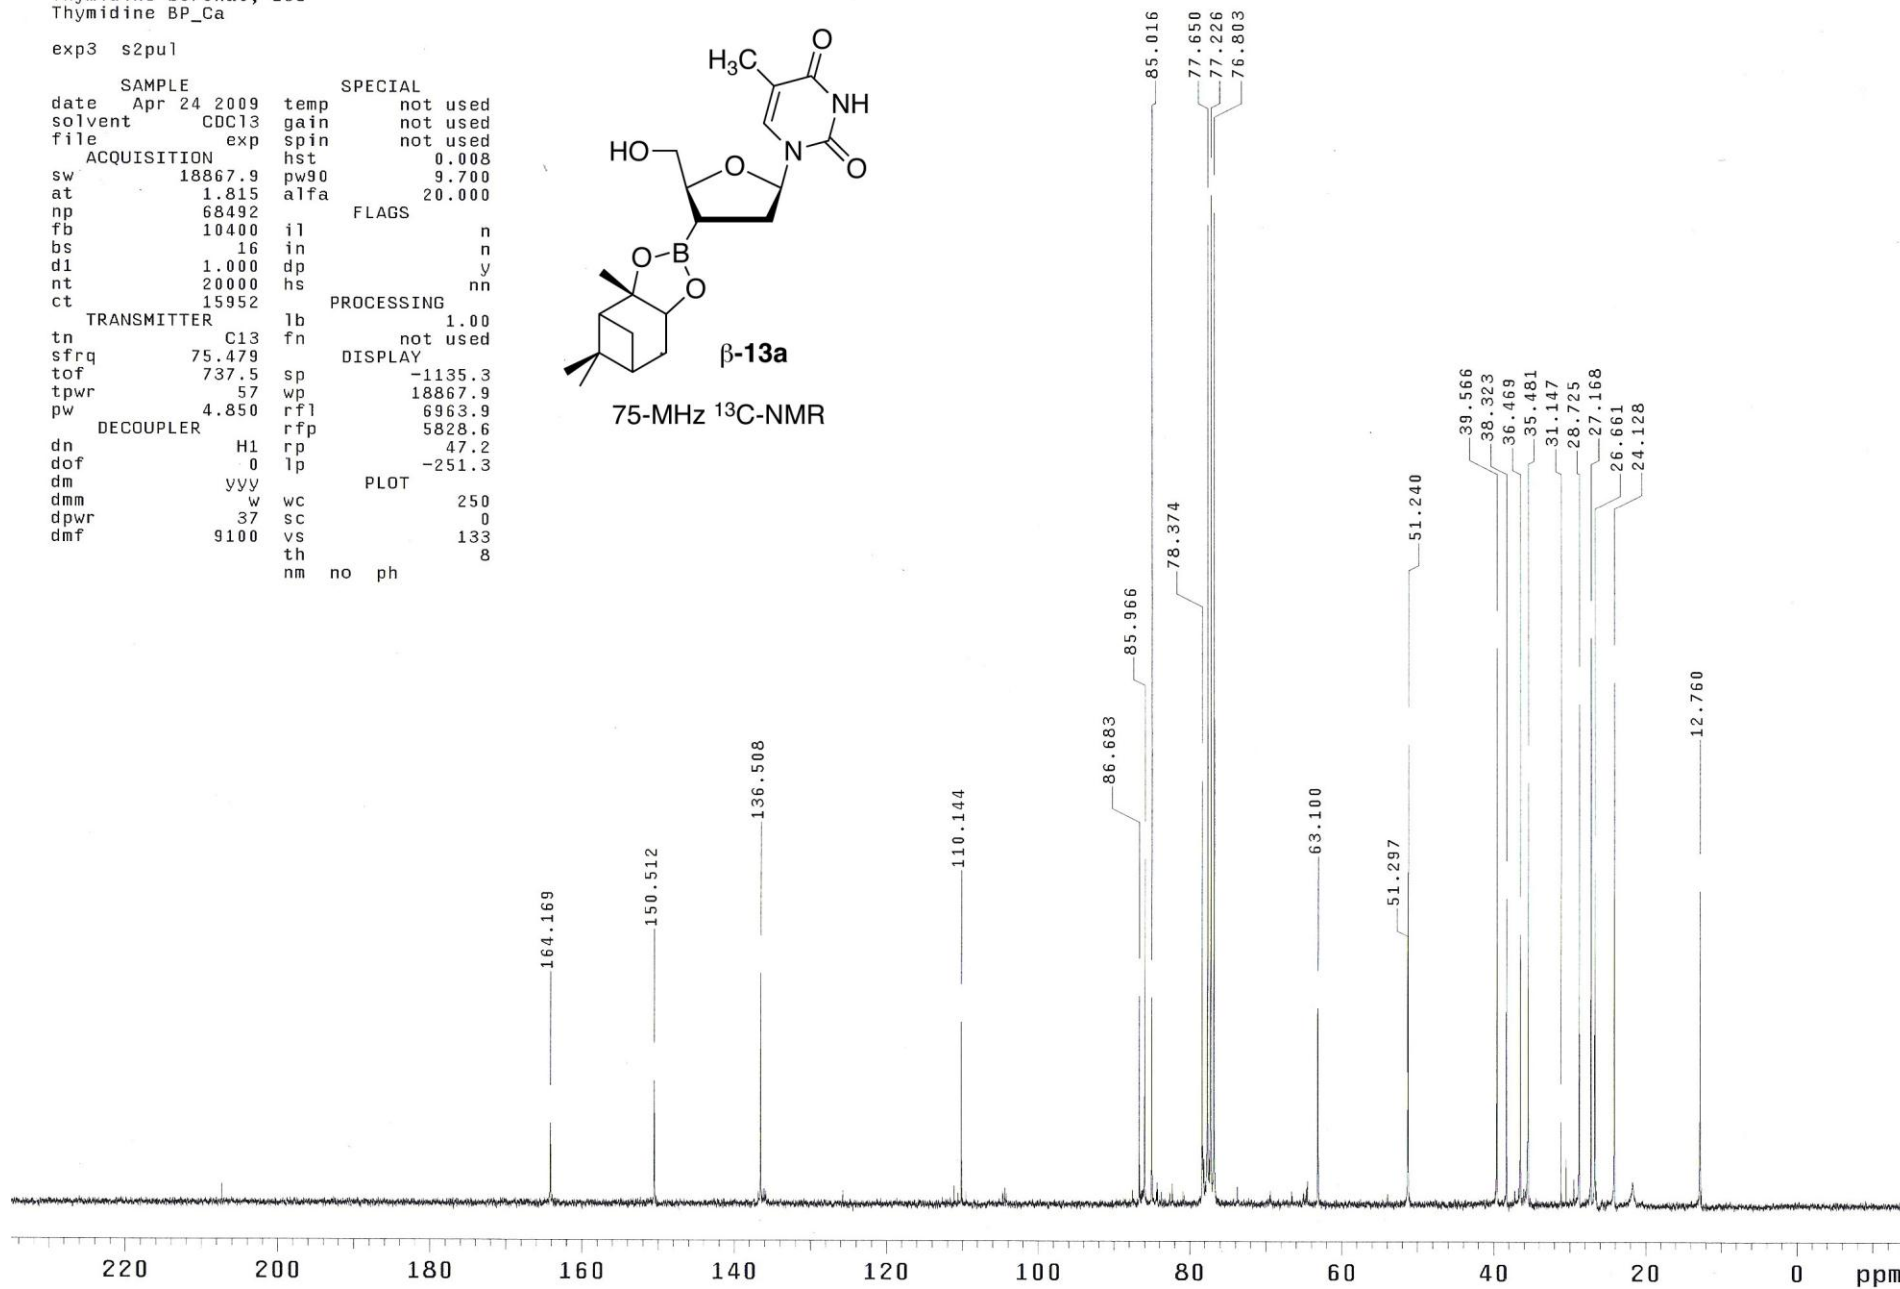

Thymidine boronic ester  
2nd fr Oxidized

exp4 std1h

|             |            |            |         |
|-------------|------------|------------|---------|
| SAMPLE      |            | DEC. & VT  |         |
| date        | May 1 2009 | dfrq       | 300.145 |
| solvent     | D2O        | dn         | H1      |
| file        | exp        | dpwr       | 30      |
| ACQUISITION |            | dof        | 0       |
| sfrq        | 300.145    | dm         | nnn     |
| tn          | H1         | dmm        | C       |
| at          | 1.995      | dmf        | 200     |
| np          | 17984      | PROCESSING |         |
| sw          | 4506.5     | wtfile     | ft      |
| fb          | not used   | proc       | fn      |
| bs          | 16         | not used   |         |
| tpwr        | 57         |            |         |
| pw          | 4.5        | werr       |         |
| d1          | 1.000      | wexp       |         |
| tof         | 0          | wbs        |         |
| nt          | 16         | wnt        |         |
| ct          | 16         |            |         |
| alock       | n          |            |         |
| gain        | not used   |            |         |
| FLAGS       |            |            |         |
| il          | n          |            |         |
| in          | n          |            |         |
| dp          | y          |            |         |
| DISPLAY     |            |            |         |
| sp          | 9.8        |            |         |
| wp          | 2727.6     |            |         |
| vs          | 4968       |            |         |
| sc          | 0          |            |         |
| wc          | 250        |            |         |
| hzmm        | 10.91      |            |         |
| is          | 771.90     |            |         |
| rfl         | 2147.5     |            |         |
| rfp         | 1440.7     |            |         |
| th          | 10         |            |         |
| ins         | 1.000      |            |         |
| nm          | cdc ph     |            |         |

$\alpha/\beta$ -mixture of thymidine  
anomers from H<sub>2</sub>O<sub>2</sub>  
oxidation of  $\alpha/\beta$  mixture  
of **13a** isomers  
300-MHz <sup>1</sup>H-NMR  
in D<sub>2</sub>O

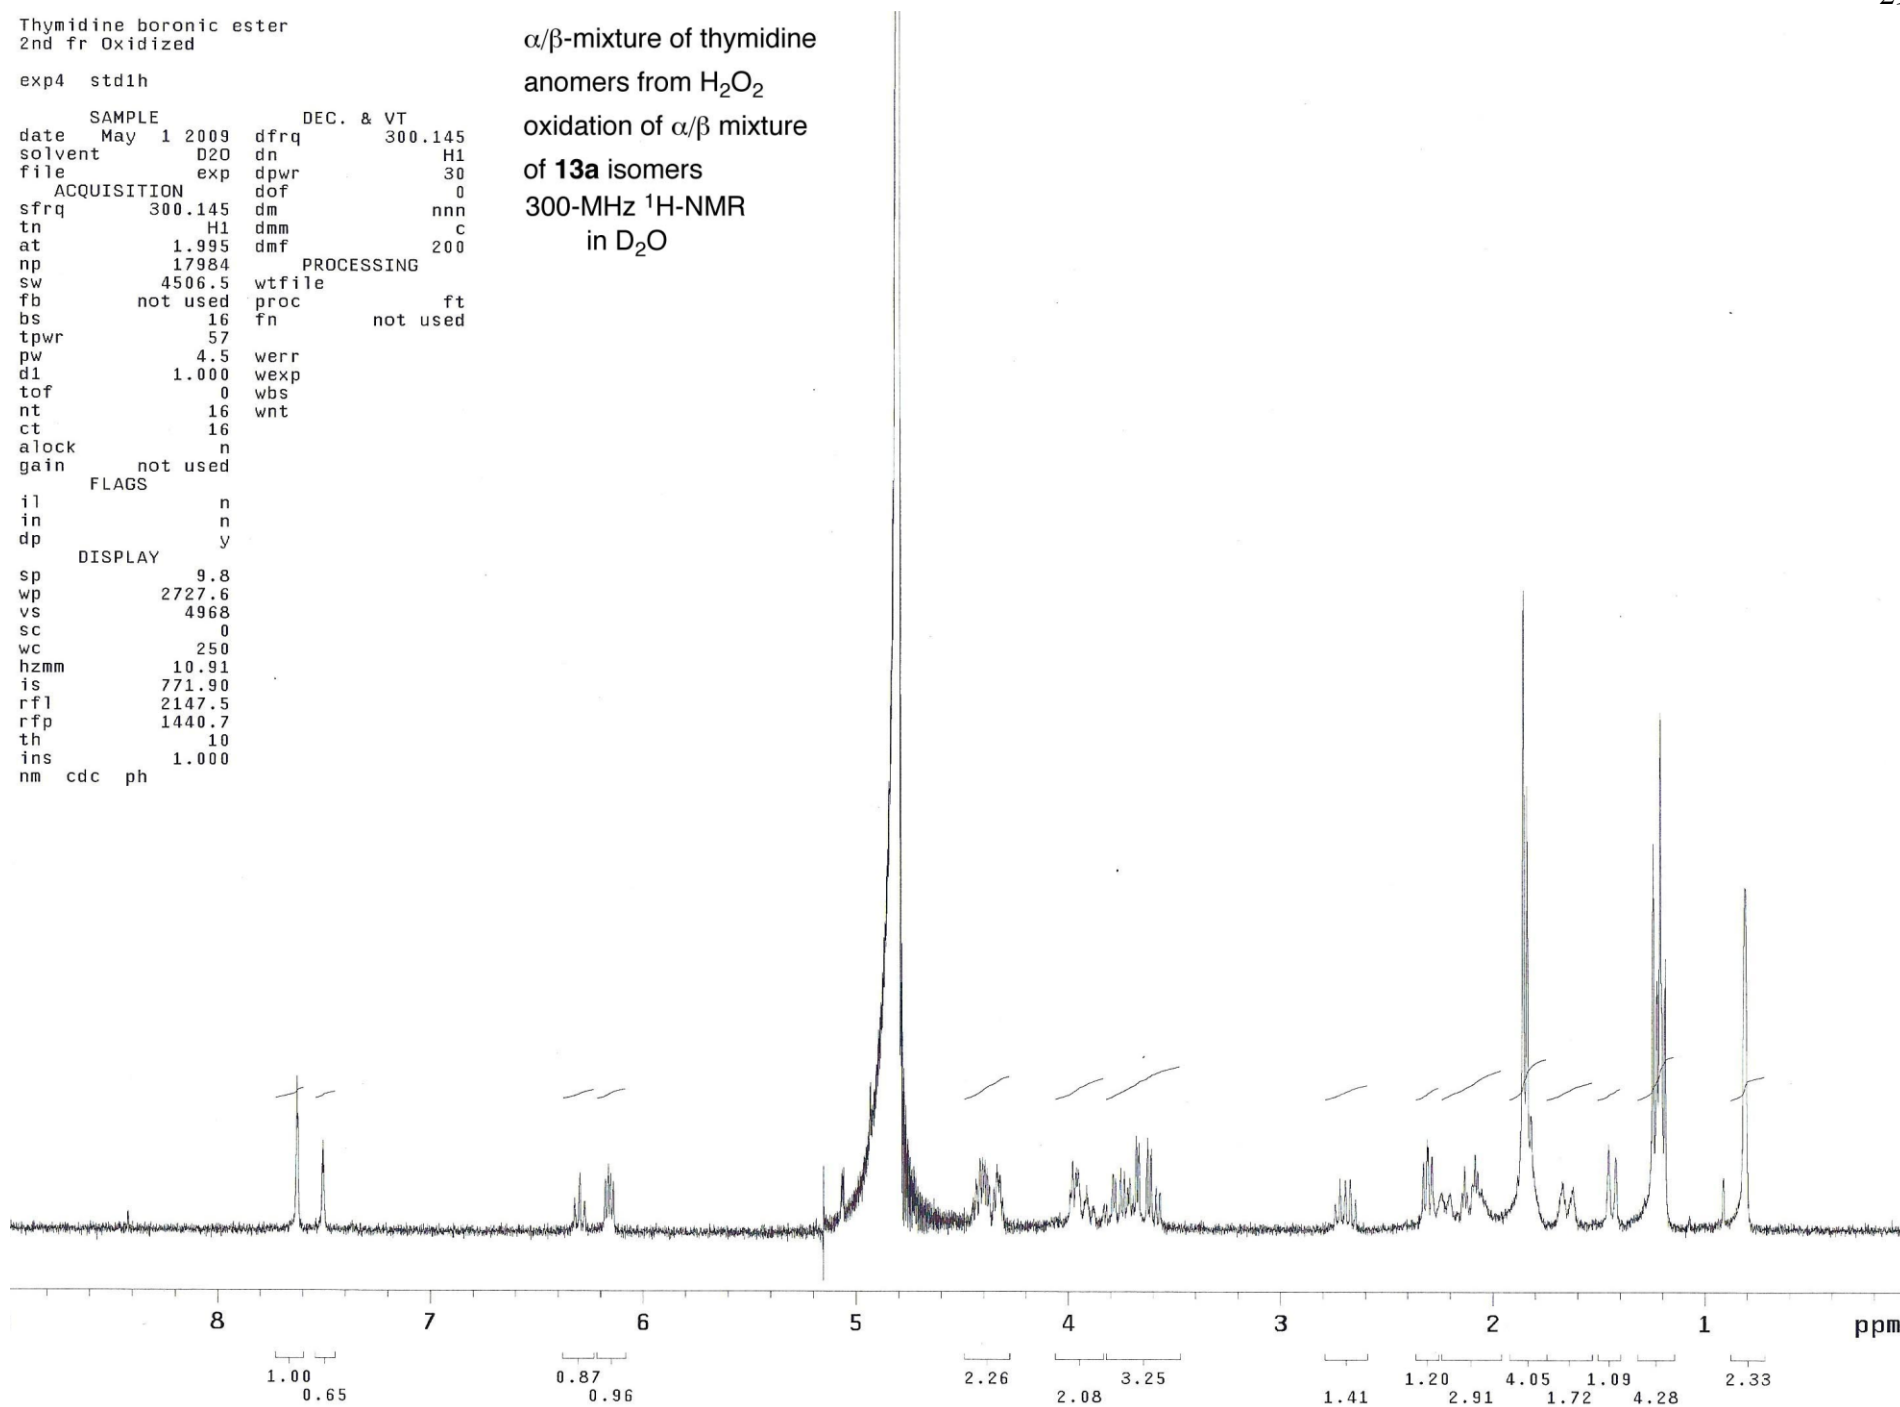

Thymidine boronic ester  
1st fr Oxidized

exp4 std1h

| SAMPLE      |            | DEC. & VT  |         |
|-------------|------------|------------|---------|
| date        | May 1 2009 | dfrq       | 300.145 |
| solvent     | D2O        | dn         | H1      |
| file        | exp        | dpwr       | 30      |
| ACQUISITION |            | dof        | 0       |
| sfrq        | 300.145    | dm         | nnn     |
| tn          | H1         | dmm        | c       |
| at          | 1.995      | dmf        | 200     |
| np          | 17984      | PROCESSING |         |
| sw          | 4506.5     | wtfile     | ft      |
| fb          | not used   | proc       | fn      |
| bs          | 16         | not used   |         |
| tpwr        | 57         | werr       |         |
| pw          | 4.5        | wexp       |         |
| d1          | 1.000      | wbs        |         |
| tof         | 0          | wnt        |         |
| nt          | 16         |            |         |
| ct          | 16         |            |         |
| alock       | n          |            |         |
| gain        | not used   |            |         |
| FLAGS       |            |            |         |
| il          | n          |            |         |
| in          | n          |            |         |
| dp          | y          |            |         |
| DISPLAY     |            |            |         |
| sp          | 58.4       |            |         |
| wp          | 2548.6     |            |         |
| vs          | 2341       |            |         |
| sc          | 0          |            |         |
| wc          | 250        |            |         |
| hzmm        | 10.19      |            |         |
| is          | 290.02     |            |         |
| rfl         | 2148.3     |            |         |
| rfp         | 1443.7     |            |         |
| th          | 5          |            |         |
| ins         | 1.000      |            |         |
| nm          | cdc ph     |            |         |

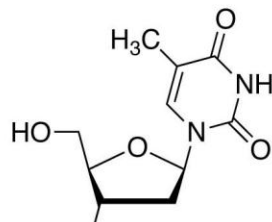

thymidine from H<sub>2</sub>O<sub>2</sub>  
oxidation of β-13a  
300-MHz <sup>1</sup>H-NMR  
in D<sub>2</sub>O

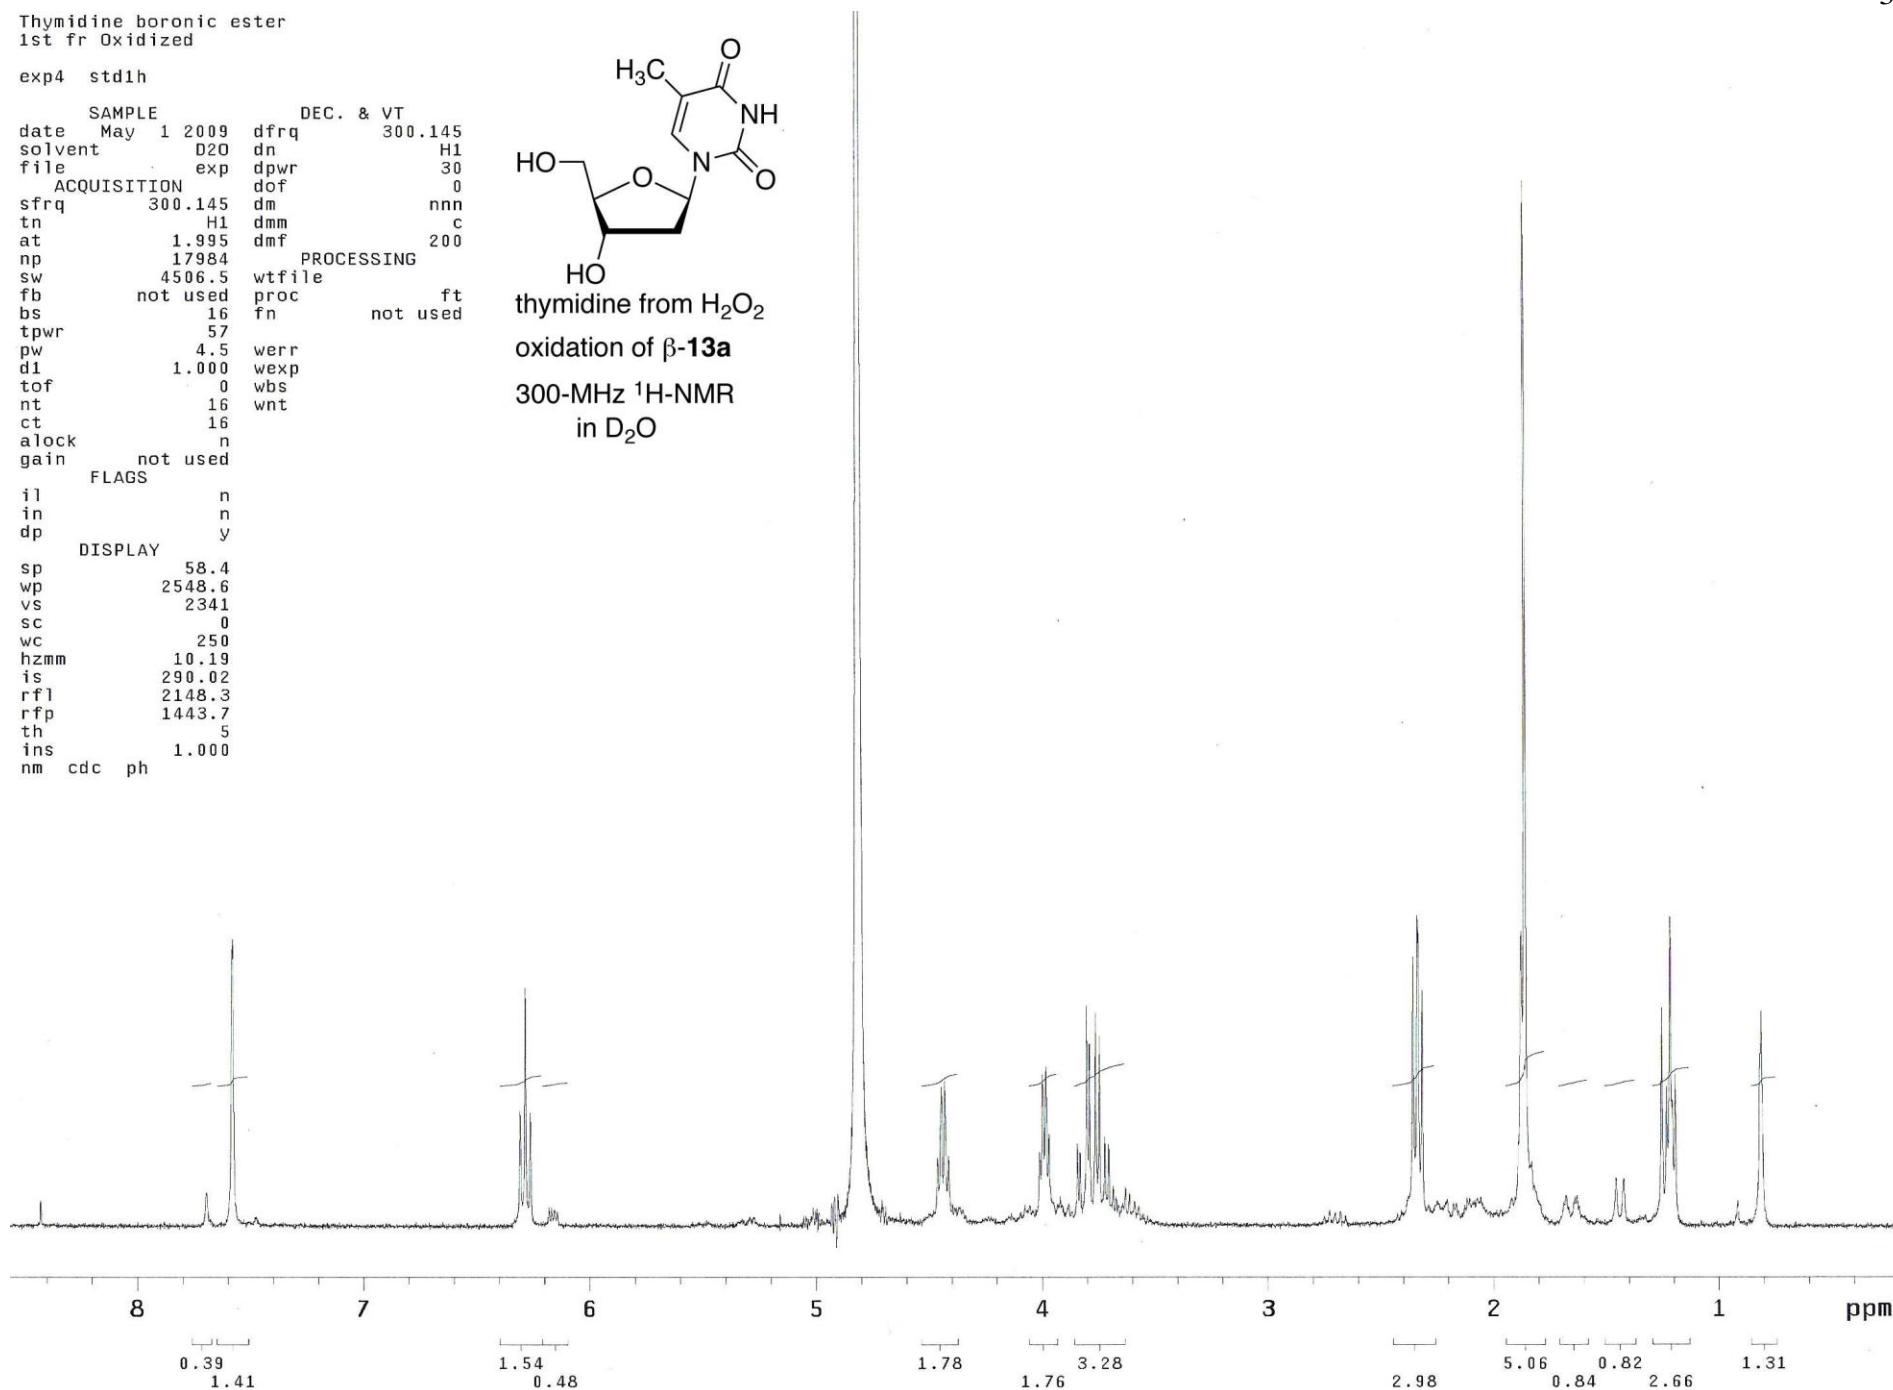

Thymidine in D2O  
standard

exp4 std1h

|             |            |            |          |
|-------------|------------|------------|----------|
| SAMPLE      |            | DEC. & VT  |          |
| date        | Apr 1 2009 | dfrq       | 300.145  |
| solvent     | D2O        | dn         | H1       |
| file        | exp        | dpwr       | 30       |
| ACQUISITION |            | do         | 0        |
| sfrq        | 300.145    | dm         | nnn      |
| tn          | H1         | dmm        | c        |
| at          | 1.995      | dmf        | 200      |
| np          | 17984      | PROCESSING |          |
| sw          | 4506.5     | wtfile     |          |
| fb          | not used   | proc       | ft       |
| bs          | 16         | fn         | not used |
| tpwr        | 57         |            |          |
| pw          | 4.5        | werr       |          |
| d1          | 1.000      | wexp       |          |
| tof         | 0          | wbs        |          |
| nt          | 16         | wnt        |          |
| ct          | 16         |            |          |
| alock       | n          |            |          |
| gain        | not used   |            |          |
| FLAGS       |            |            |          |
| il          | n          |            |          |
| in          | n          |            |          |
| dp          | y          |            |          |
| DISPLAY     |            |            |          |
| sp          | 291.1      |            |          |
| wp          | 2446.5     |            |          |
| vs          | 1863       |            |          |
| sc          | 0          |            |          |
| wc          | 250        |            |          |
| hzmm        | 9.79       |            |          |
| is          | 500.00     |            |          |
| rfl         | 2148.1     |            |          |
| rfp         | 1443.7     |            |          |
| th          | 20         |            |          |
| ins         | 1.000      |            |          |
| nm          | cdc ph     |            |          |

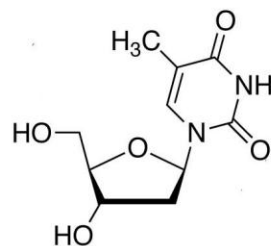

thymidine authentic  
sample  
300-MHz <sup>1</sup>H-NMR  
in D<sub>2</sub>O

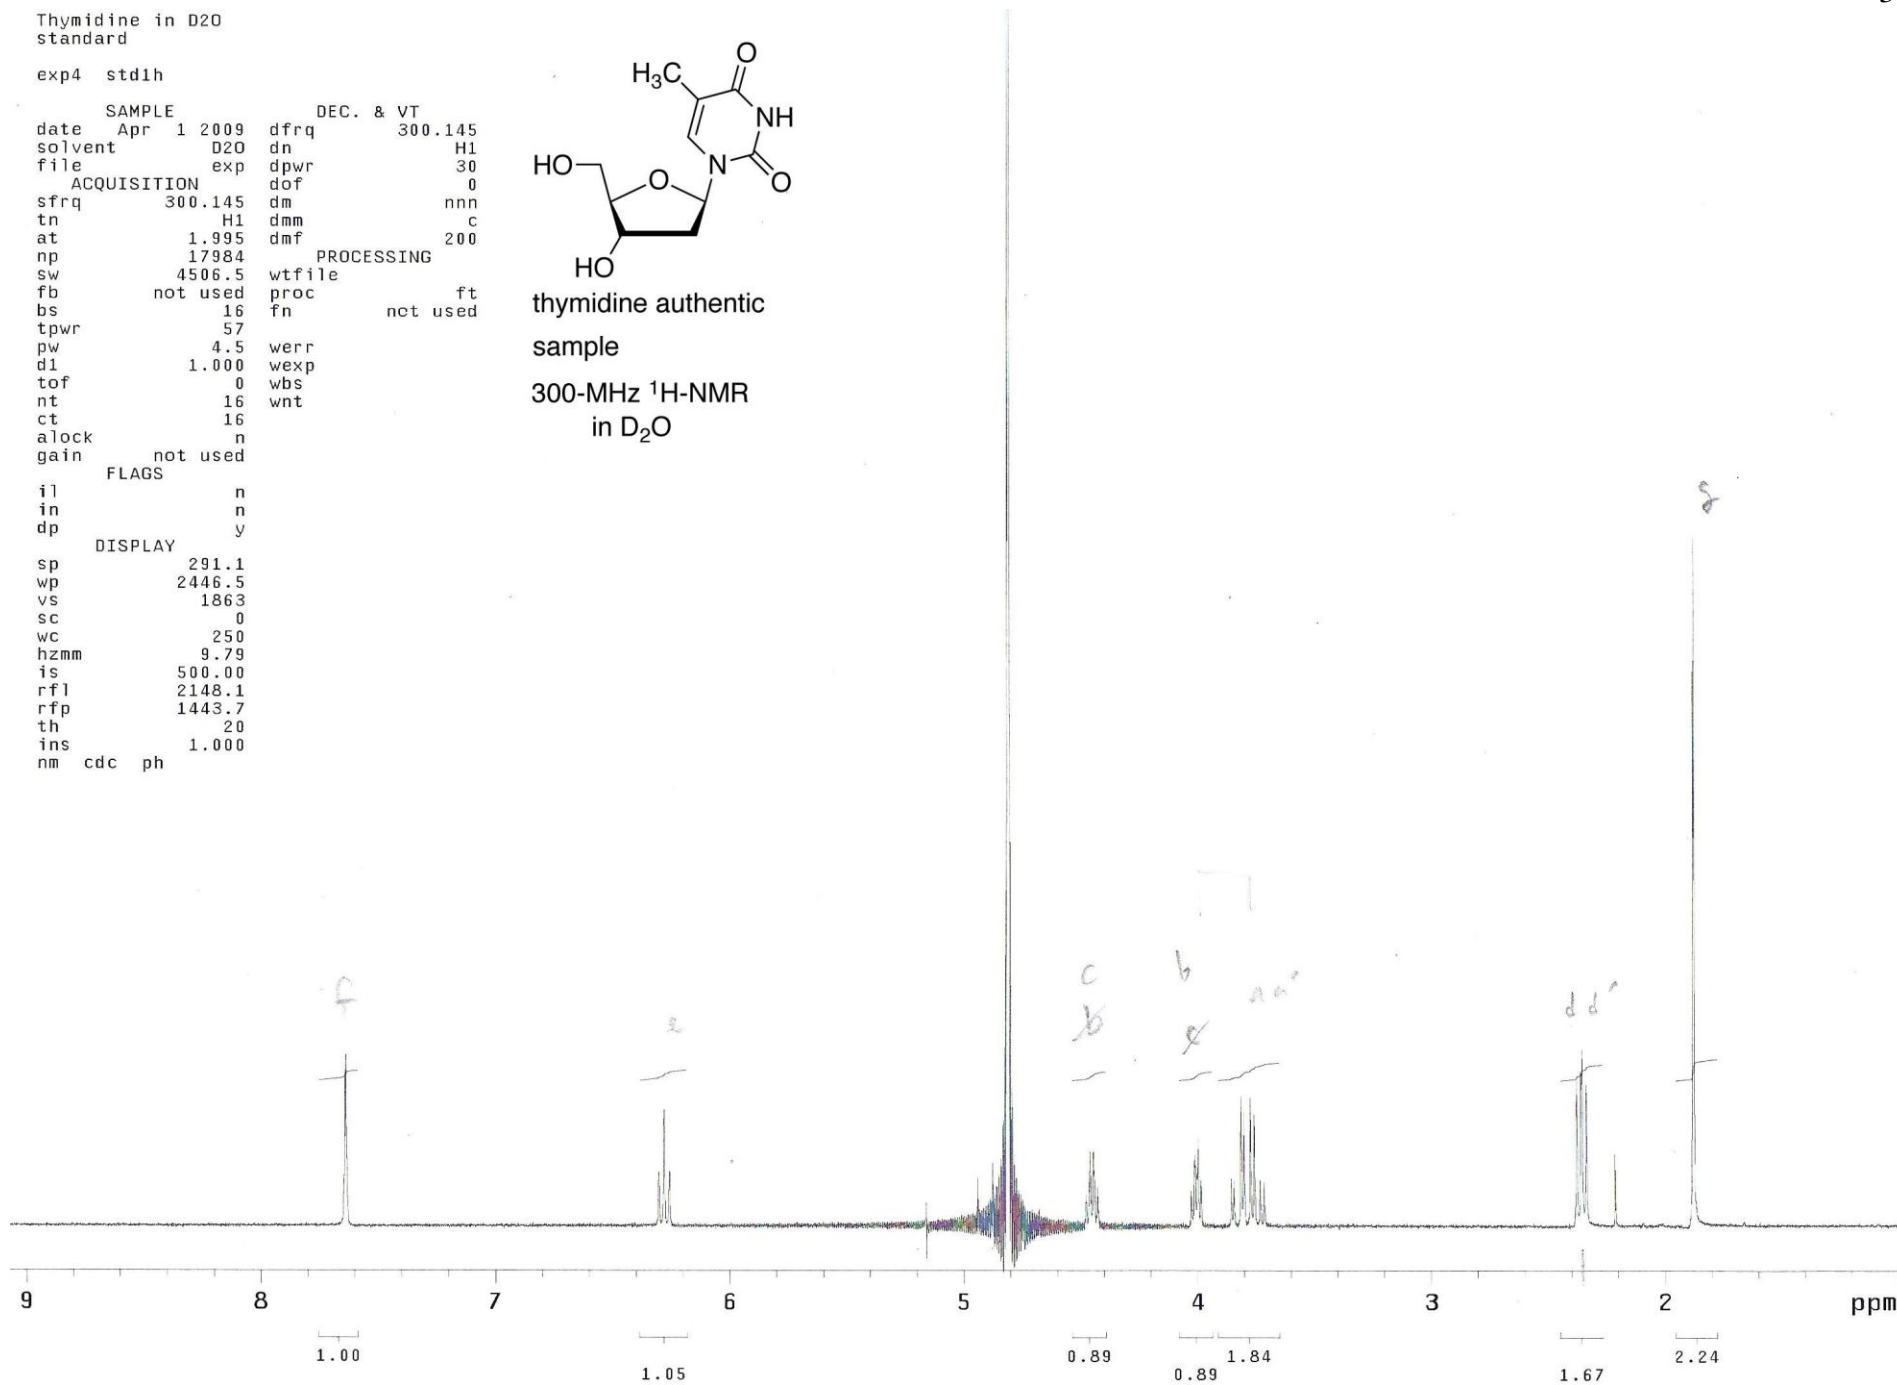

Fluorouridine boronate  
PLC purified, 30mg

exp1 std1h

|             |            |            |          |
|-------------|------------|------------|----------|
| SAMPLE      |            | DEC. & VT  |          |
| date        | Jul 4 2009 | dfrq       | 300.144  |
| solvent     | CDC13      | dn         | H1       |
| file        | exp        | dpwr       | 30       |
| ACQUISITION |            | dof        | 0        |
| sfrq        | 300.144    | dm         | nnn      |
| tn          | H1         | dmm        | c        |
| at          | 1.995      | dmf        | 200      |
| np          | 17984      | PROCESSING |          |
| sw          | 4506.5     | wtfile     |          |
| fb          | not used   | proc       | ft       |
| bs          | 4          | fn         | not used |
| tpwr        | 57         |            |          |
| pw          | 4.5        | werr       |          |
| d1          | 1.000      | wexp       |          |
| tof         | 0          | wbs        |          |
| nt          | 16         | wnt        |          |
| ct          | 16         |            |          |
| alock       | n          |            |          |
| gain        | not used   |            |          |
| FLAGS       |            |            |          |
| il          | n          |            |          |
| in          | n          |            |          |
| dp          | y          |            |          |
| DISPLAY     |            |            |          |
| sp          | -177.4     |            |          |
| wp          | 3313.8     |            |          |
| vs          | 151        |            |          |
| sc          | 0          |            |          |
| wc          | 250        |            |          |
| hzmm        | 13.26      |            |          |
| is          | 82.22      |            |          |
| rfl         | 751.2      |            |          |
| rfp         | 0          |            |          |
| th          | 4          |            |          |
| ins         | 2.000      |            |          |
| nm          | cdc ph     |            |          |

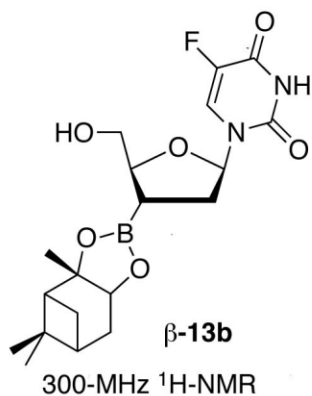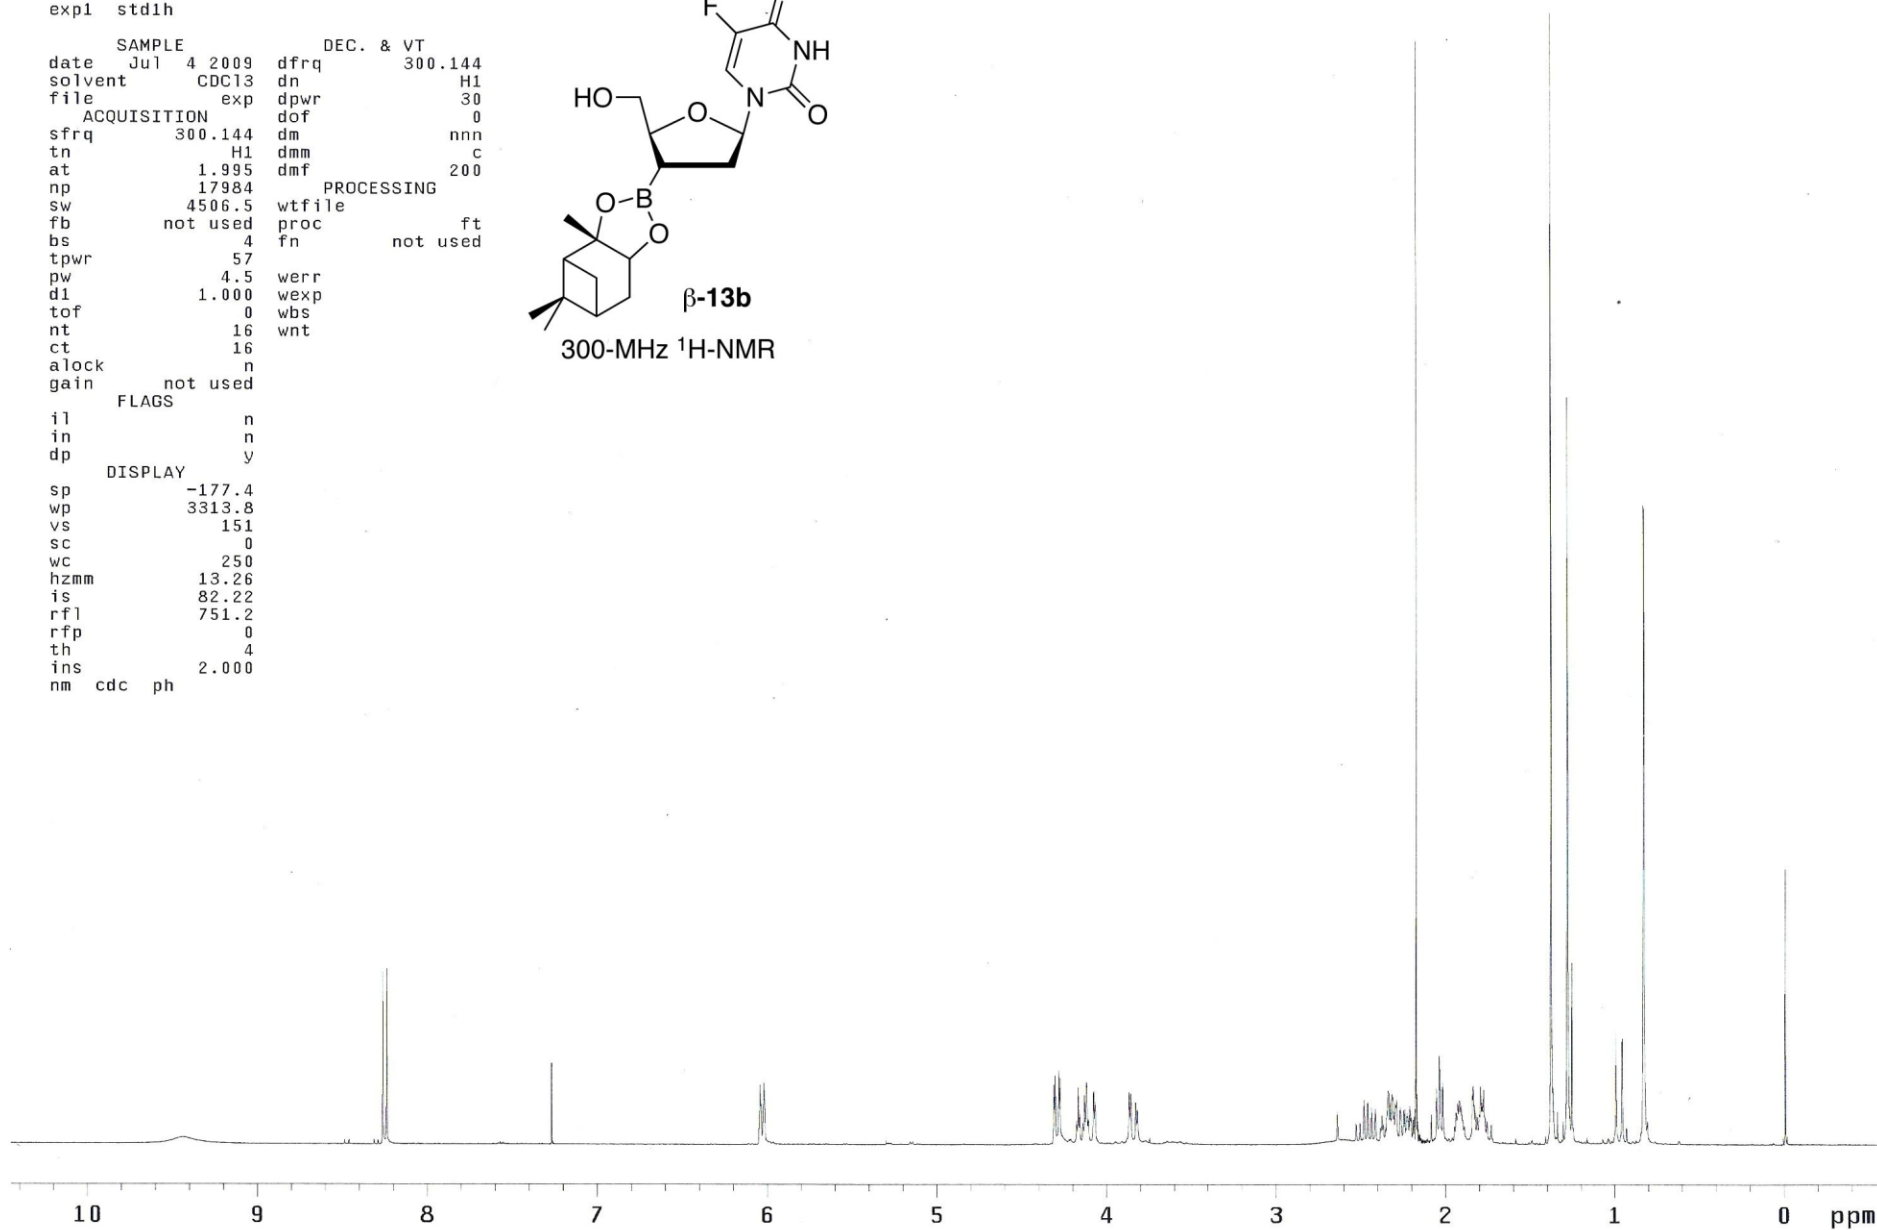

FUridine Boronic ester, B11

exp3 s2pu1

| SAMPLE              |                | DEC. & VT  |         |
|---------------------|----------------|------------|---------|
| date                | Jul 13 2009    | dfrq       | 499.859 |
| solvent             | CDCl3          | dn         | H1      |
| file                | /net/work6/da~ | dpwr       | 43      |
| ta/NMRC300/matteso~ |                | dof        | 0       |
| n/Tommy_Kim_Folder~ |                | dm         | nyy     |
| /Uridine_B11/Furid~ |                | dmm        | w       |
| ine_BP_std.fid      |                | dmf        | 9940    |
| ACQUISITION         |                |            |         |
| sfrq                | 160.377        | dres       | 1.0     |
| tn                  | B11            | homo       | n       |
| at                  | 0.200          | temp       | 22.0    |
| np                  | 10000          | DEC2       |         |
| sw                  | 25000.0        | dfrq2      | 0       |
| fb                  | 14000          | dn2        |         |
| bs                  | 32             | dpwr2      | 1       |
| tpwr                | 57             | dof2       | 0       |
| pw                  | 5.5            | dm2        | n       |
| d1                  | 1.000          | dmm2       | c       |
| tof                 | 7915.4         | dmf2       | 9900    |
| nt                  | 1000           | dseq2      |         |
| ct                  | 1000           | dres2      | 1.0     |
| alock               | n              | homo2      | n       |
| gain                | not used       | DEC3       |         |
| FLAGS               |                |            |         |
| il                  | n              | dfrq3      | 0       |
| in                  | n              | dn3        |         |
| dp                  | y              | dpwr3      | 1       |
| hs                  | nn             | dof3       | 0       |
|                     |                | dm3        | n       |
|                     |                | dmm3       | c       |
| DISPLAY             |                |            |         |
| sp                  | -9564.2        | dmf3       | 9900    |
| wp                  | 24998.5        | dseq3      |         |
| vs                  | 664            | dres3      | 1.0     |
| sc                  | 0              | homo3      | n       |
| wc                  | 250            | PROCESSING |         |
| hzmm                | 99.99          | lb         | 7.80    |
| is                  | 500.00         | wtfile     |         |
| rfl                 | 9565.7         | proc       | ft      |
| rfp                 | 0              | fn         | 32768   |
| th                  | 7              | math       | f       |
| ins                 | 100.000        |            |         |
| nm                  | cdc ph         | werr       |         |
|                     |                | wexp       |         |
|                     |                | wbs        |         |
|                     |                | wnt        |         |

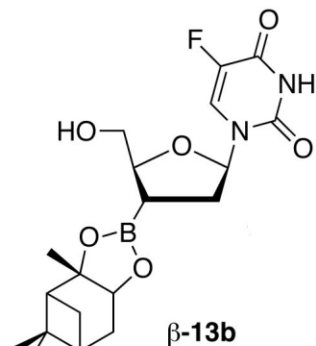

160-MHz <sup>11</sup>B-NMR

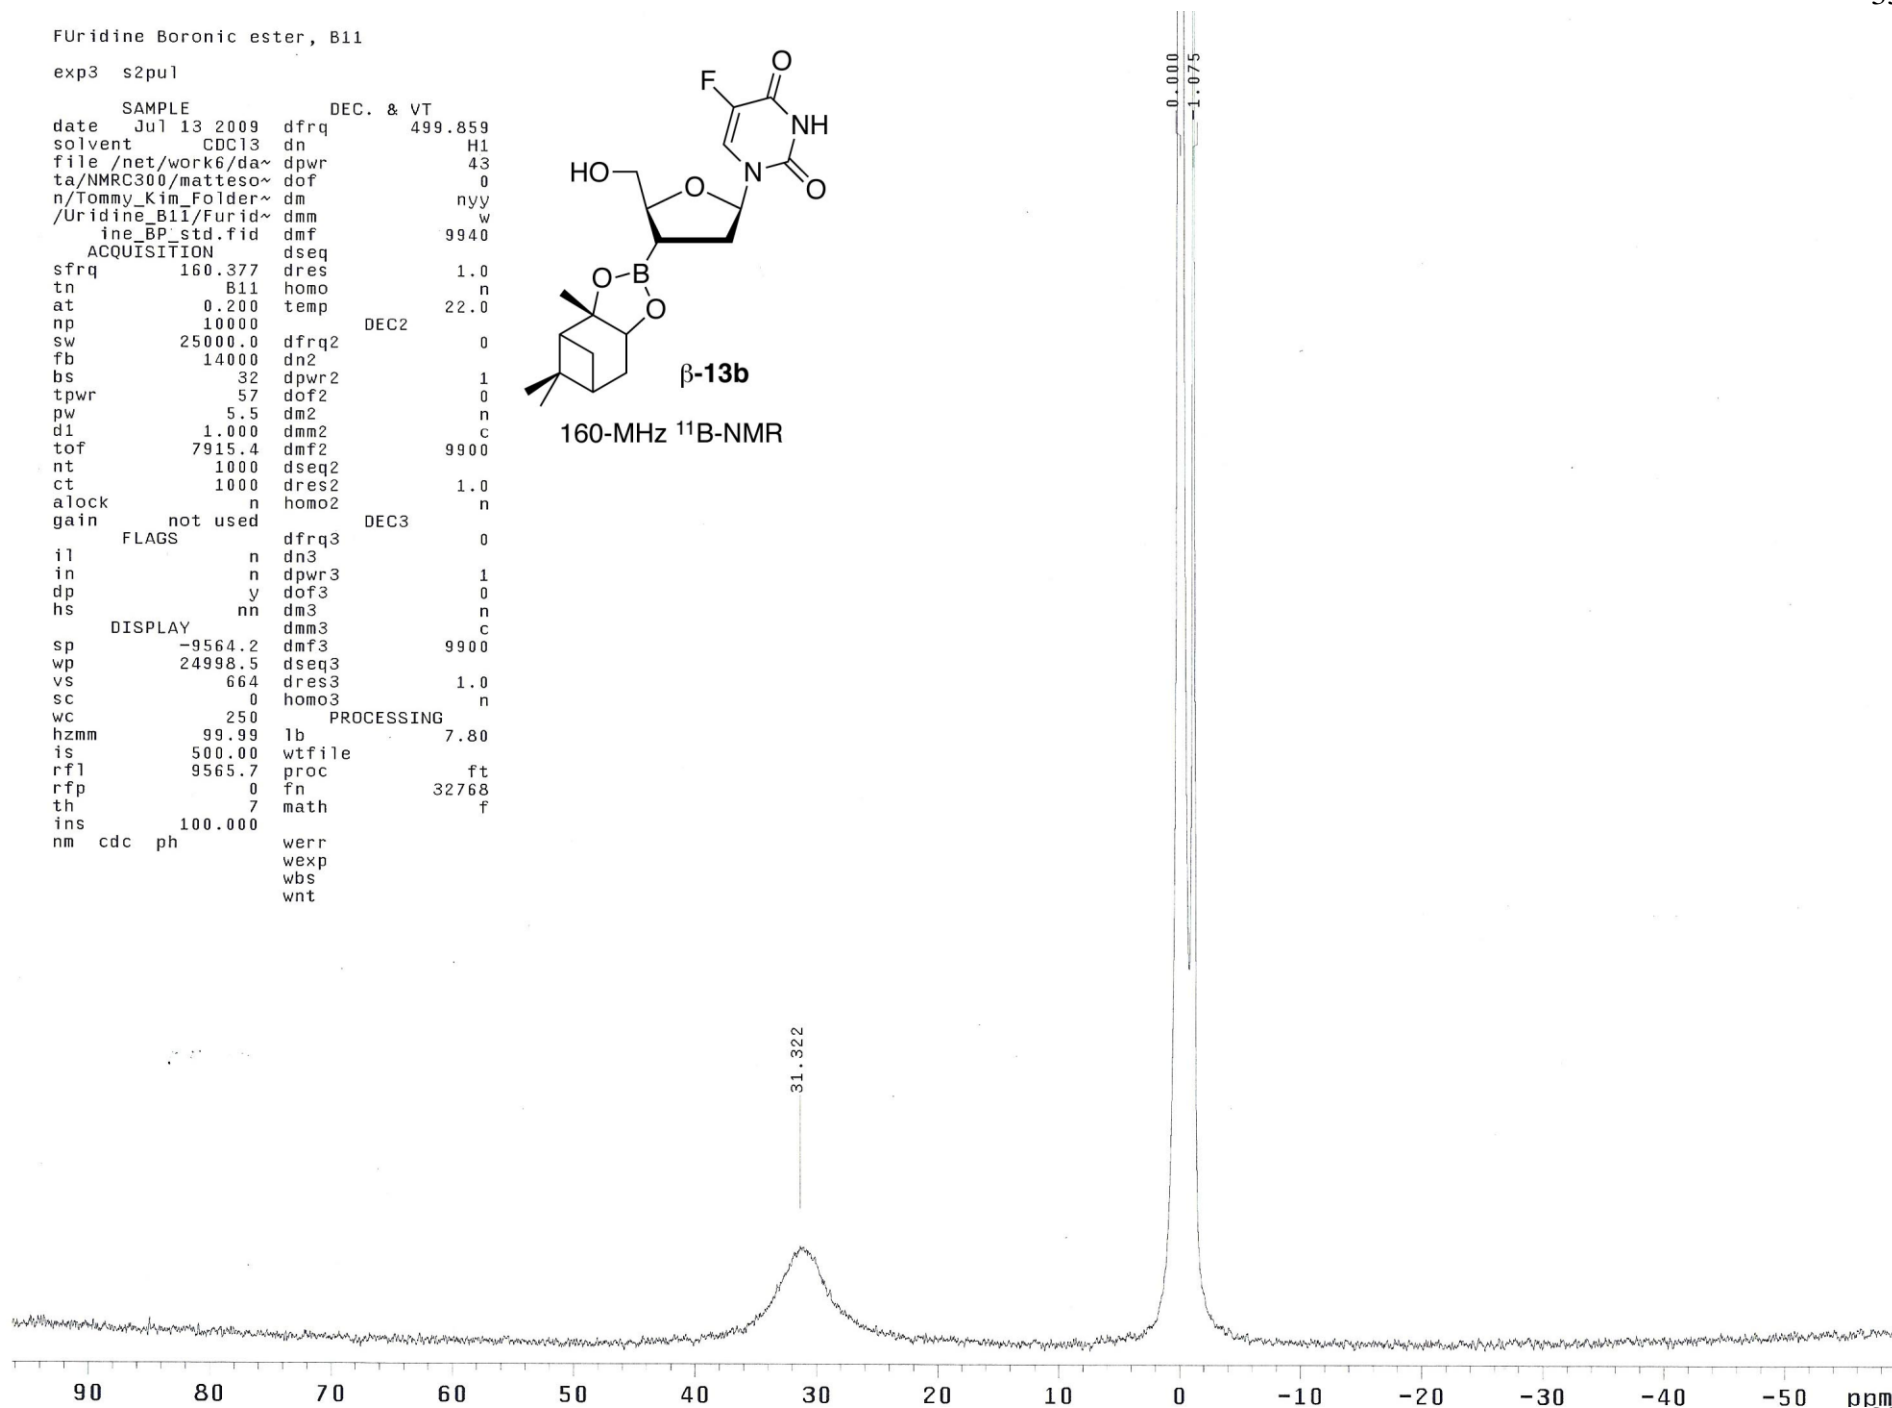

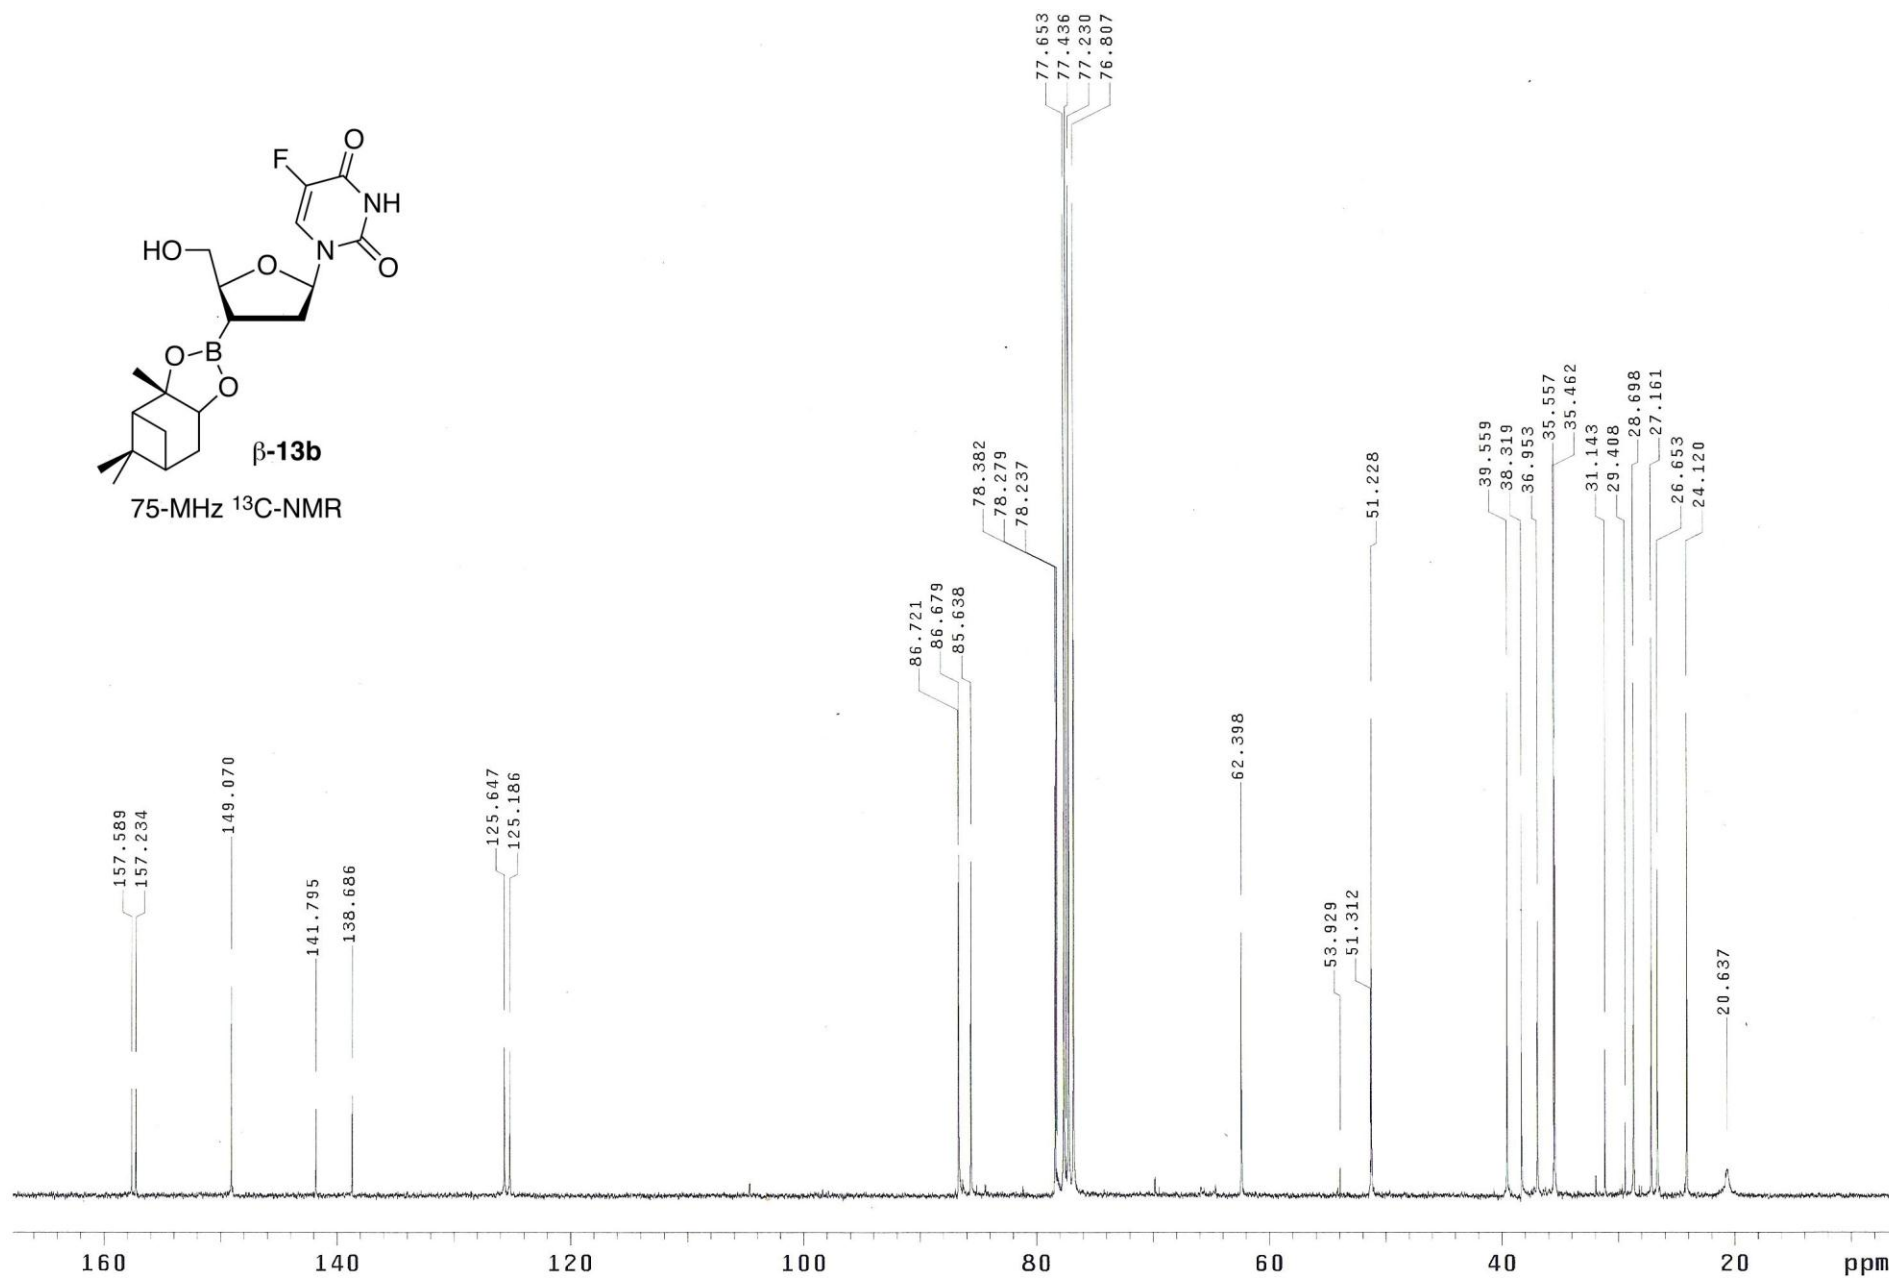

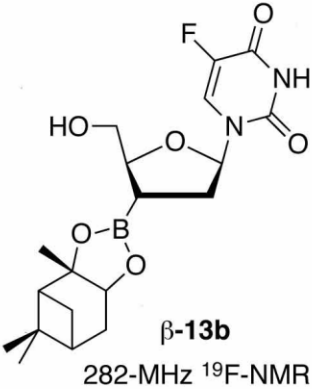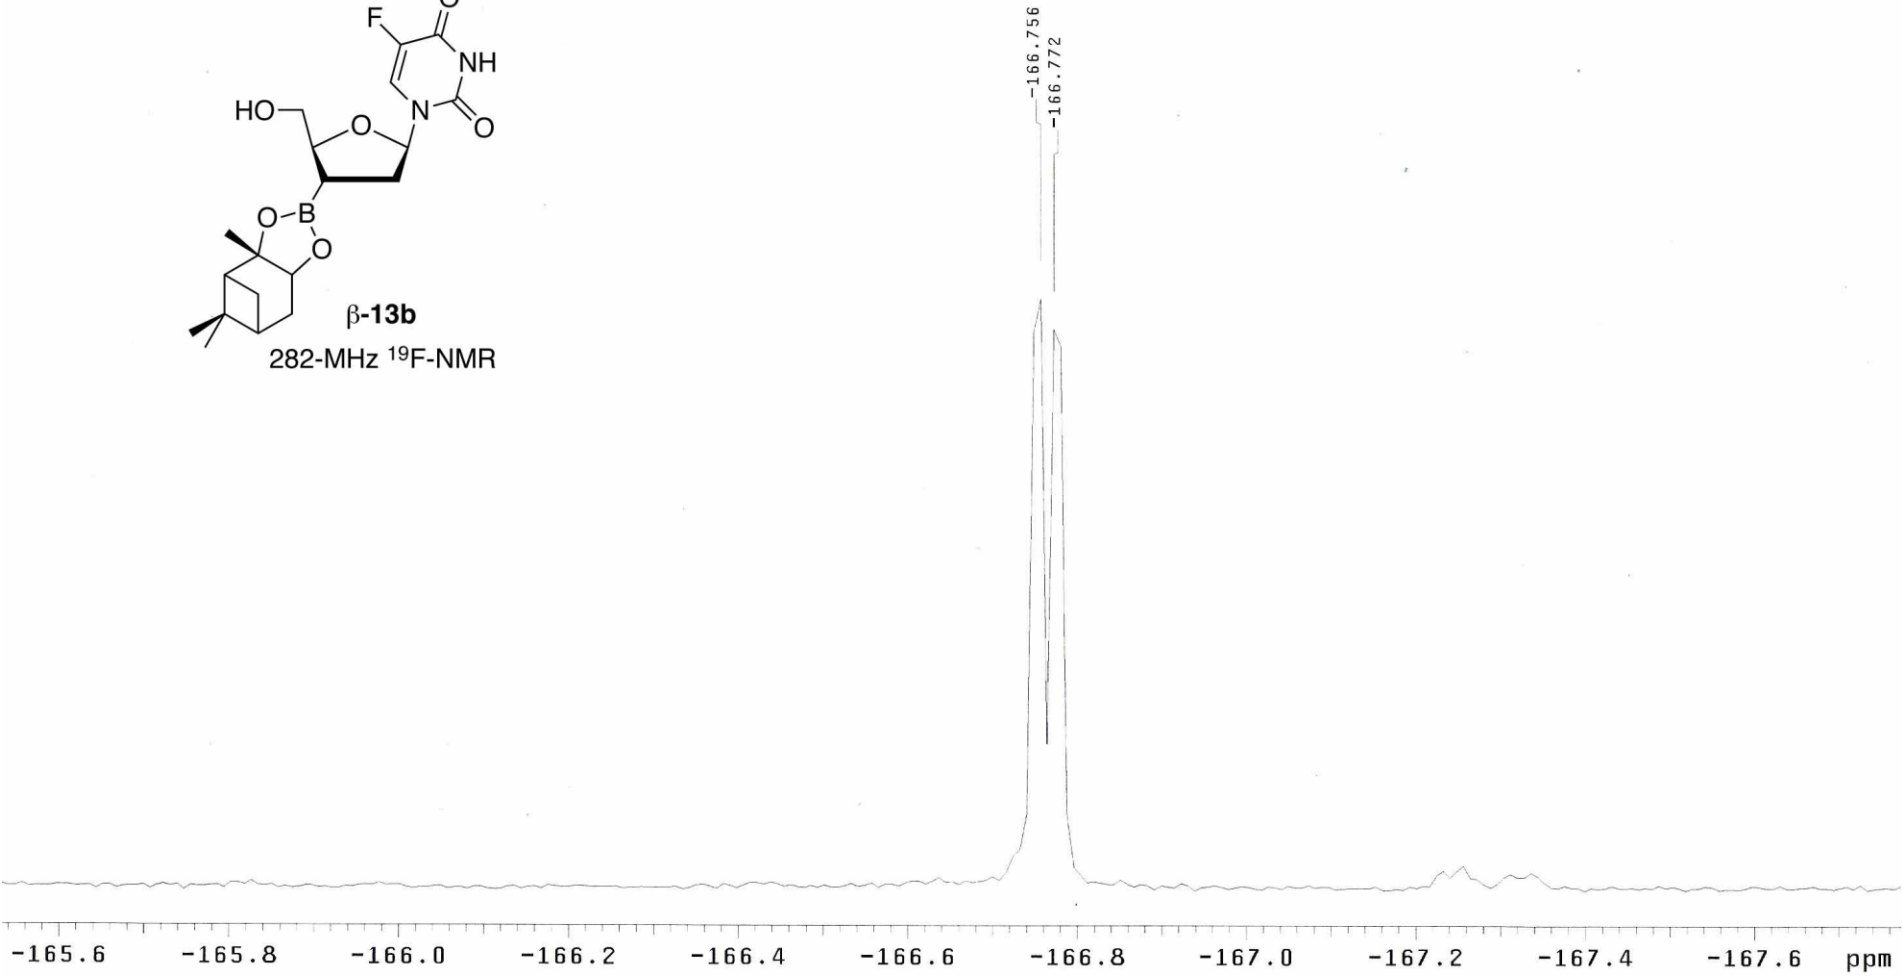

IUridine  
2nd fraction  
after PLC

expl std1h

|             |            |            |          |
|-------------|------------|------------|----------|
| SAMPLE      |            | DEC. & VT  |          |
| date        | Sep 2 2009 | dfrq       | 300.144  |
| solvent     | CDC13      | dn         | H1       |
| file        | exp        | dpwr       | 30       |
| ACQUISITION |            | dof        | 0        |
| sfrq        | 300.144    | dm         | nnn      |
| tn          | H1         | dmm        | c        |
| at          | 1.995      | dmf        | 200      |
| np          | 17984      | PROCESSING |          |
| sw          | 4506.5     | wtfile     |          |
| fb          | not used   | proc       | ft       |
| bs          | 4          | fn         | not used |
| tpwr        | 57         |            |          |
| pw          | 4.5        | werr       |          |
| d1          | 1.000      | wexp       |          |
| tof         | 0          | wbs        |          |
| nt          | 16         | wnt        |          |
| ct          | 16         |            |          |
| alock       | n          |            |          |
| gain        | not used   |            |          |
| FLAGS       |            |            |          |
| il          | n          |            |          |
| in          | n          |            |          |
| dp          | y          |            |          |
| DISPLAY     |            |            |          |
| sp          | -82.8      |            |          |
| wp          | 3139.1     |            |          |
| vs          | 157        |            |          |
| sc          | 0          |            |          |
| wc          | 250        |            |          |
| hzmm        | 12.56      |            |          |
| is          | 129.66     |            |          |
| rfl         | 746.3      |            |          |
| rfp         | 0          |            |          |
| th          | 3          |            |          |
| ins         | 1.000      |            |          |
| nm          | cdc ph     |            |          |

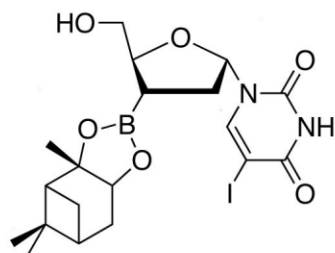

**α-13c**  
300-MHz <sup>1</sup>H-NMR

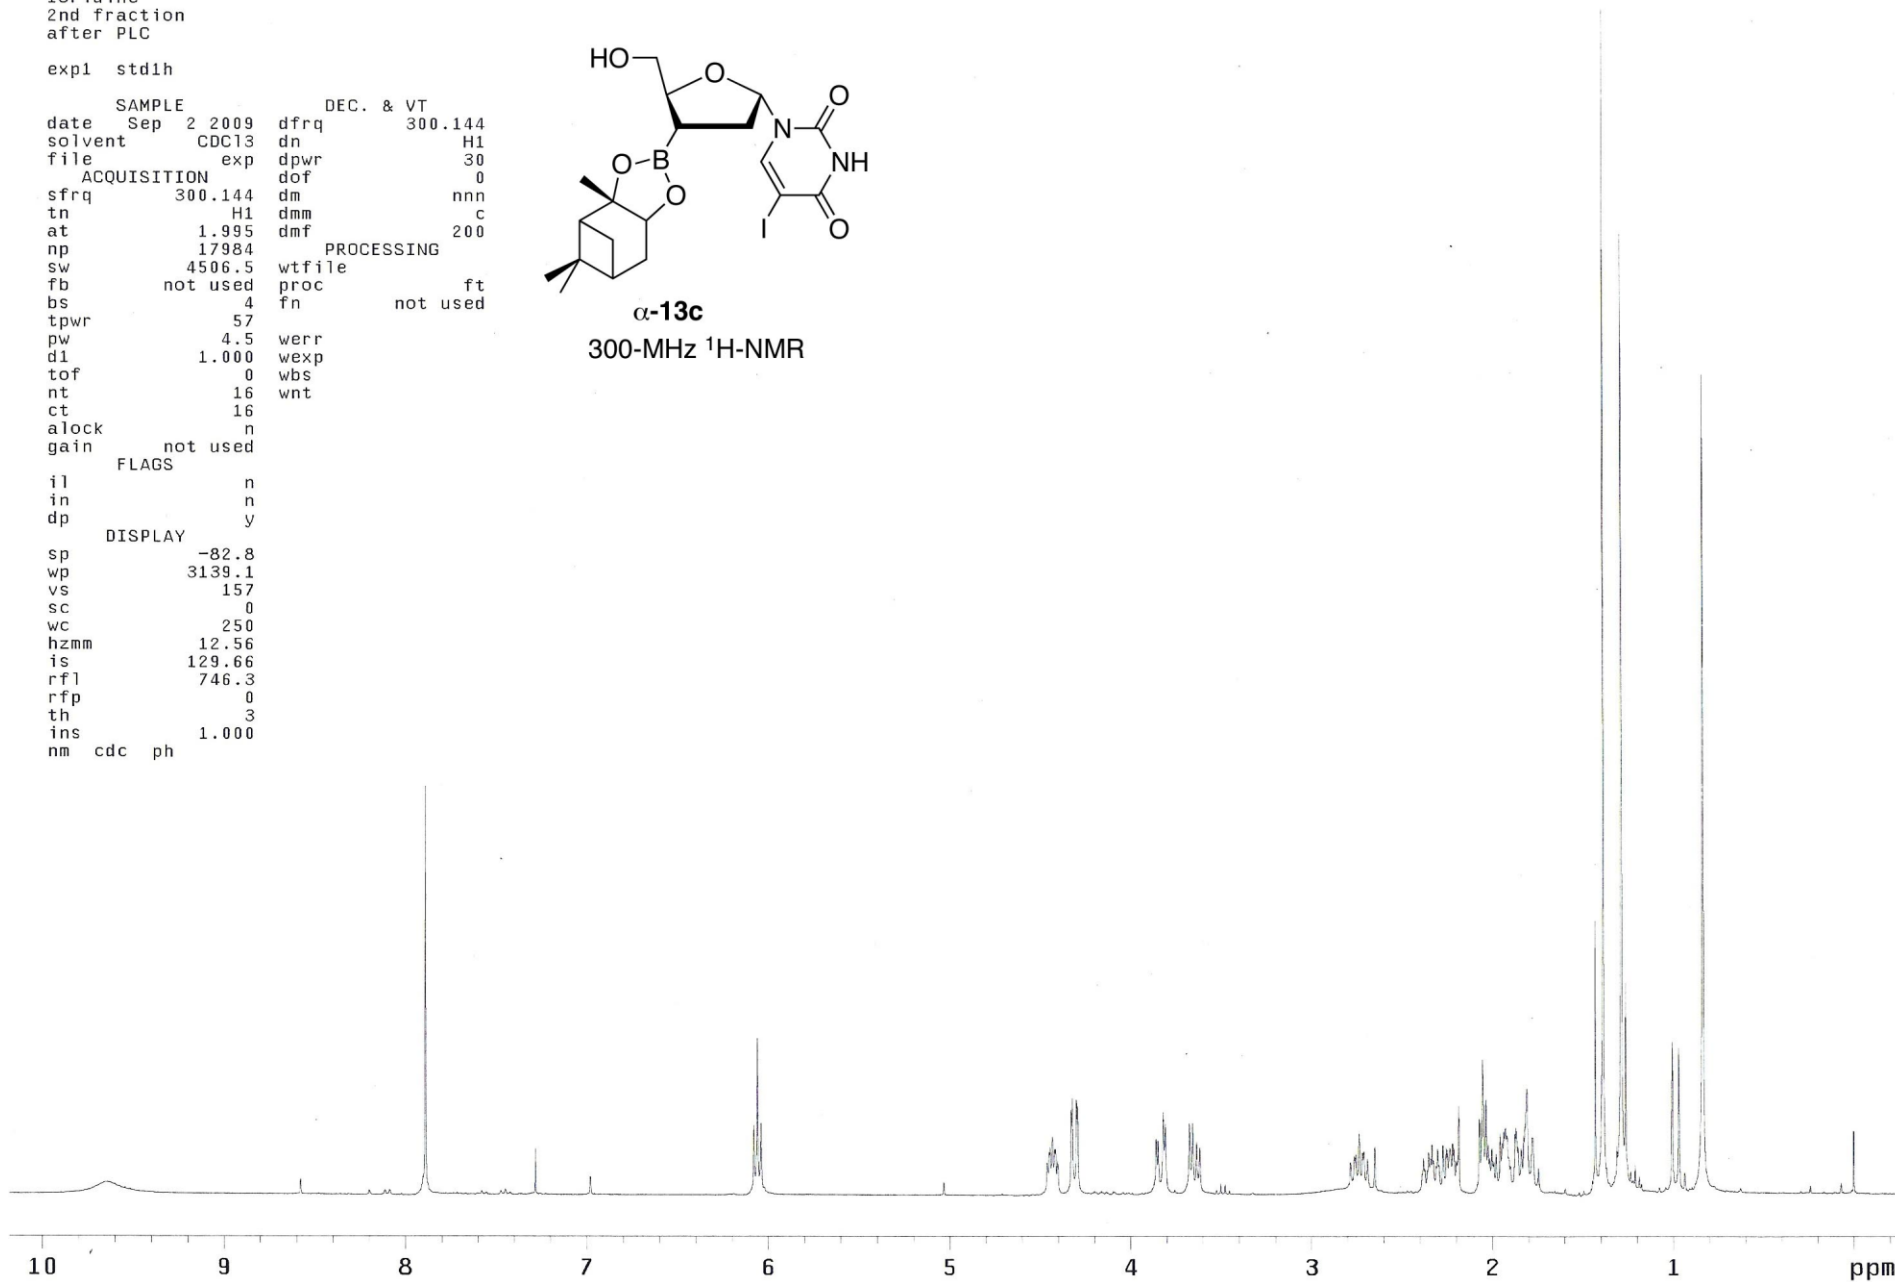

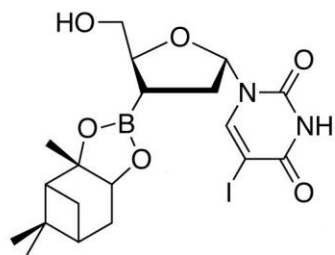

**α-13c**

75-MHz <sup>13</sup>C-NMR

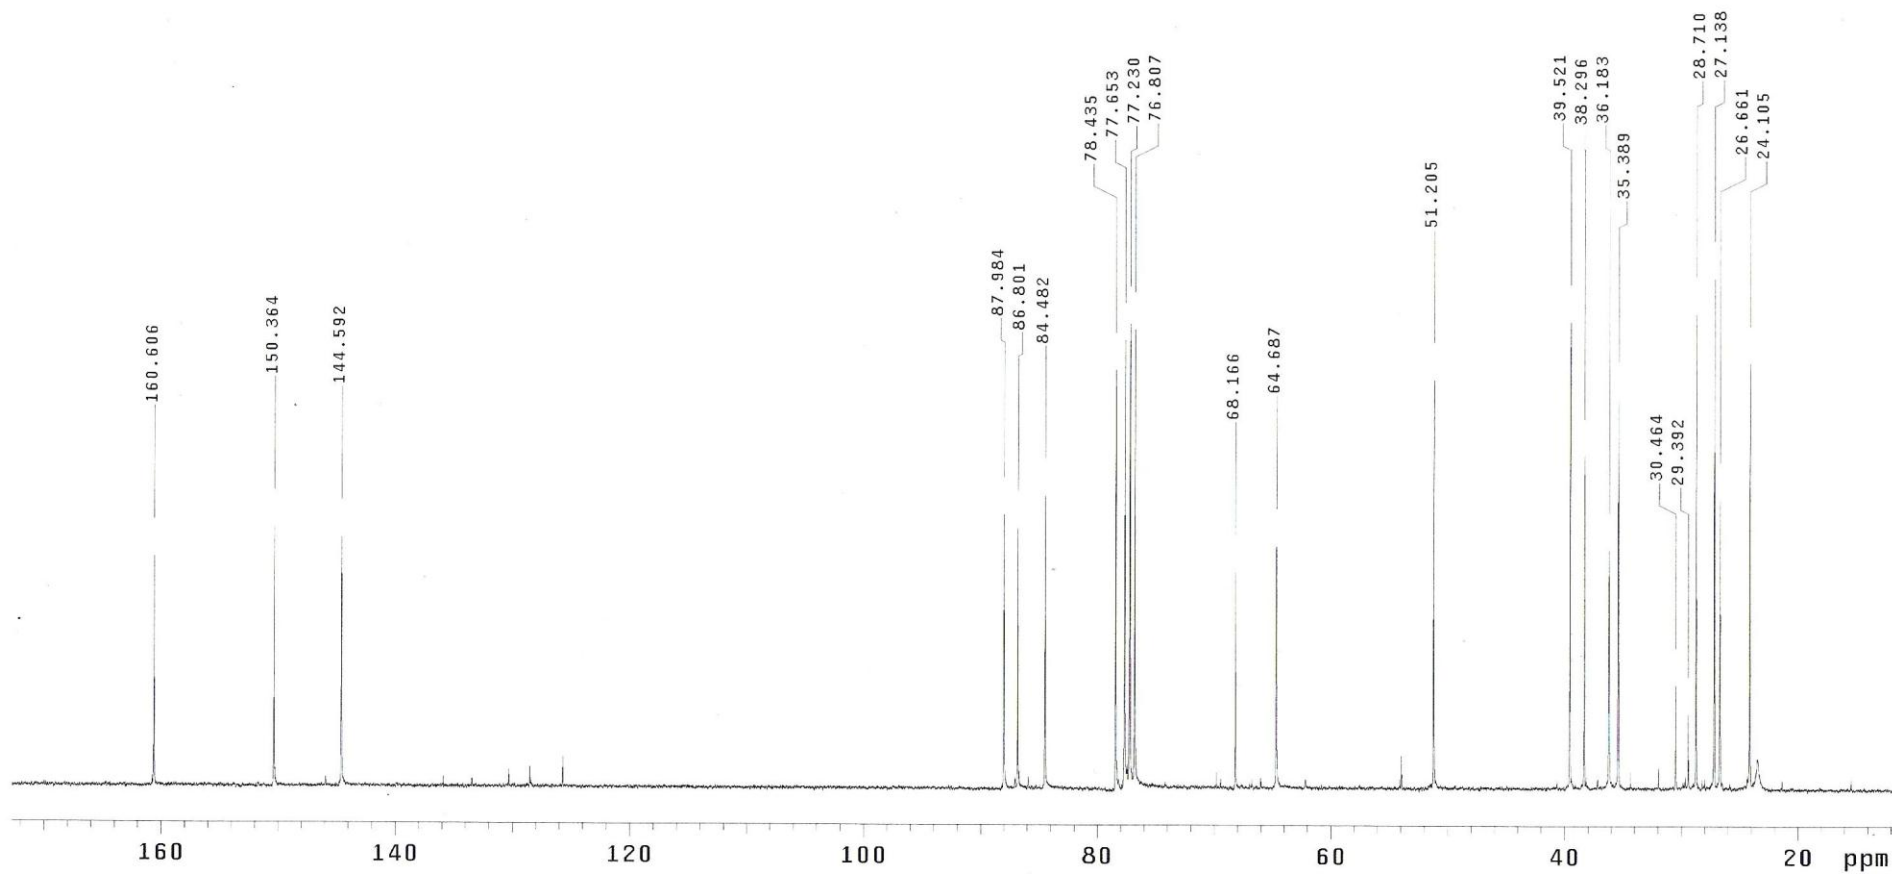

IUridine  
first fraction  
after PLC

exp1 std1h

|             |            |            |          |
|-------------|------------|------------|----------|
| SAMPLE      |            | DEC. & VT  |          |
| date        | Sep 1 2009 | dfrq       | 300.144  |
| solvent     | CDC13      | dn         | H1       |
| file        | exp        | dpwr       | 30       |
| ACQUISITION |            | dof        | 0        |
| sfrq        | 300.144    | dm         | nnn      |
| tn          | H1         | dmm        | c        |
| at          | 1.995      | dmf        | 200      |
| np          | 17984      | PROCESSING |          |
| sw          | 4506.5     | wtfile     |          |
| fb          | not used   | proc       | ft       |
| bs          | 4          | fn         | not used |
| tpwr        | 57         |            |          |
| pw          | 4.5        | werr       |          |
| d1          | 1.000      | wexp       |          |
| tof         | 0          | wbs        |          |
| nt          | 16         | wnt        |          |
| ct          | 16         |            |          |
| alock       | n          |            |          |
| gain        | not used   |            |          |
| FLAGS       |            |            |          |
| il          | n          |            |          |
| in          | n          |            |          |
| dp          | y          |            |          |
| DISPLAY     |            |            |          |
| sp          | -170.5     |            |          |
| wp          | 3165.8     |            |          |
| vs          | 157        |            |          |
| sc          | 0          |            |          |
| wc          | 250        |            |          |
| hzmm        | 12.66      |            |          |
| is          | 129.66     |            |          |
| rfl         | 747.9      |            |          |
| rfp         | 0          |            |          |
| th          | 3          |            |          |
| ins         | 1.000      |            |          |
| nm          | cdc ph     |            |          |

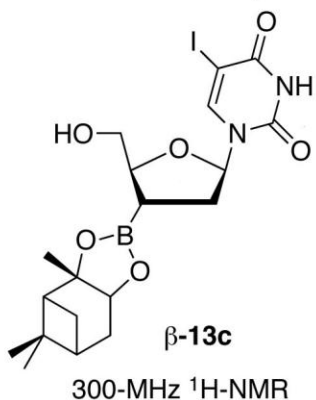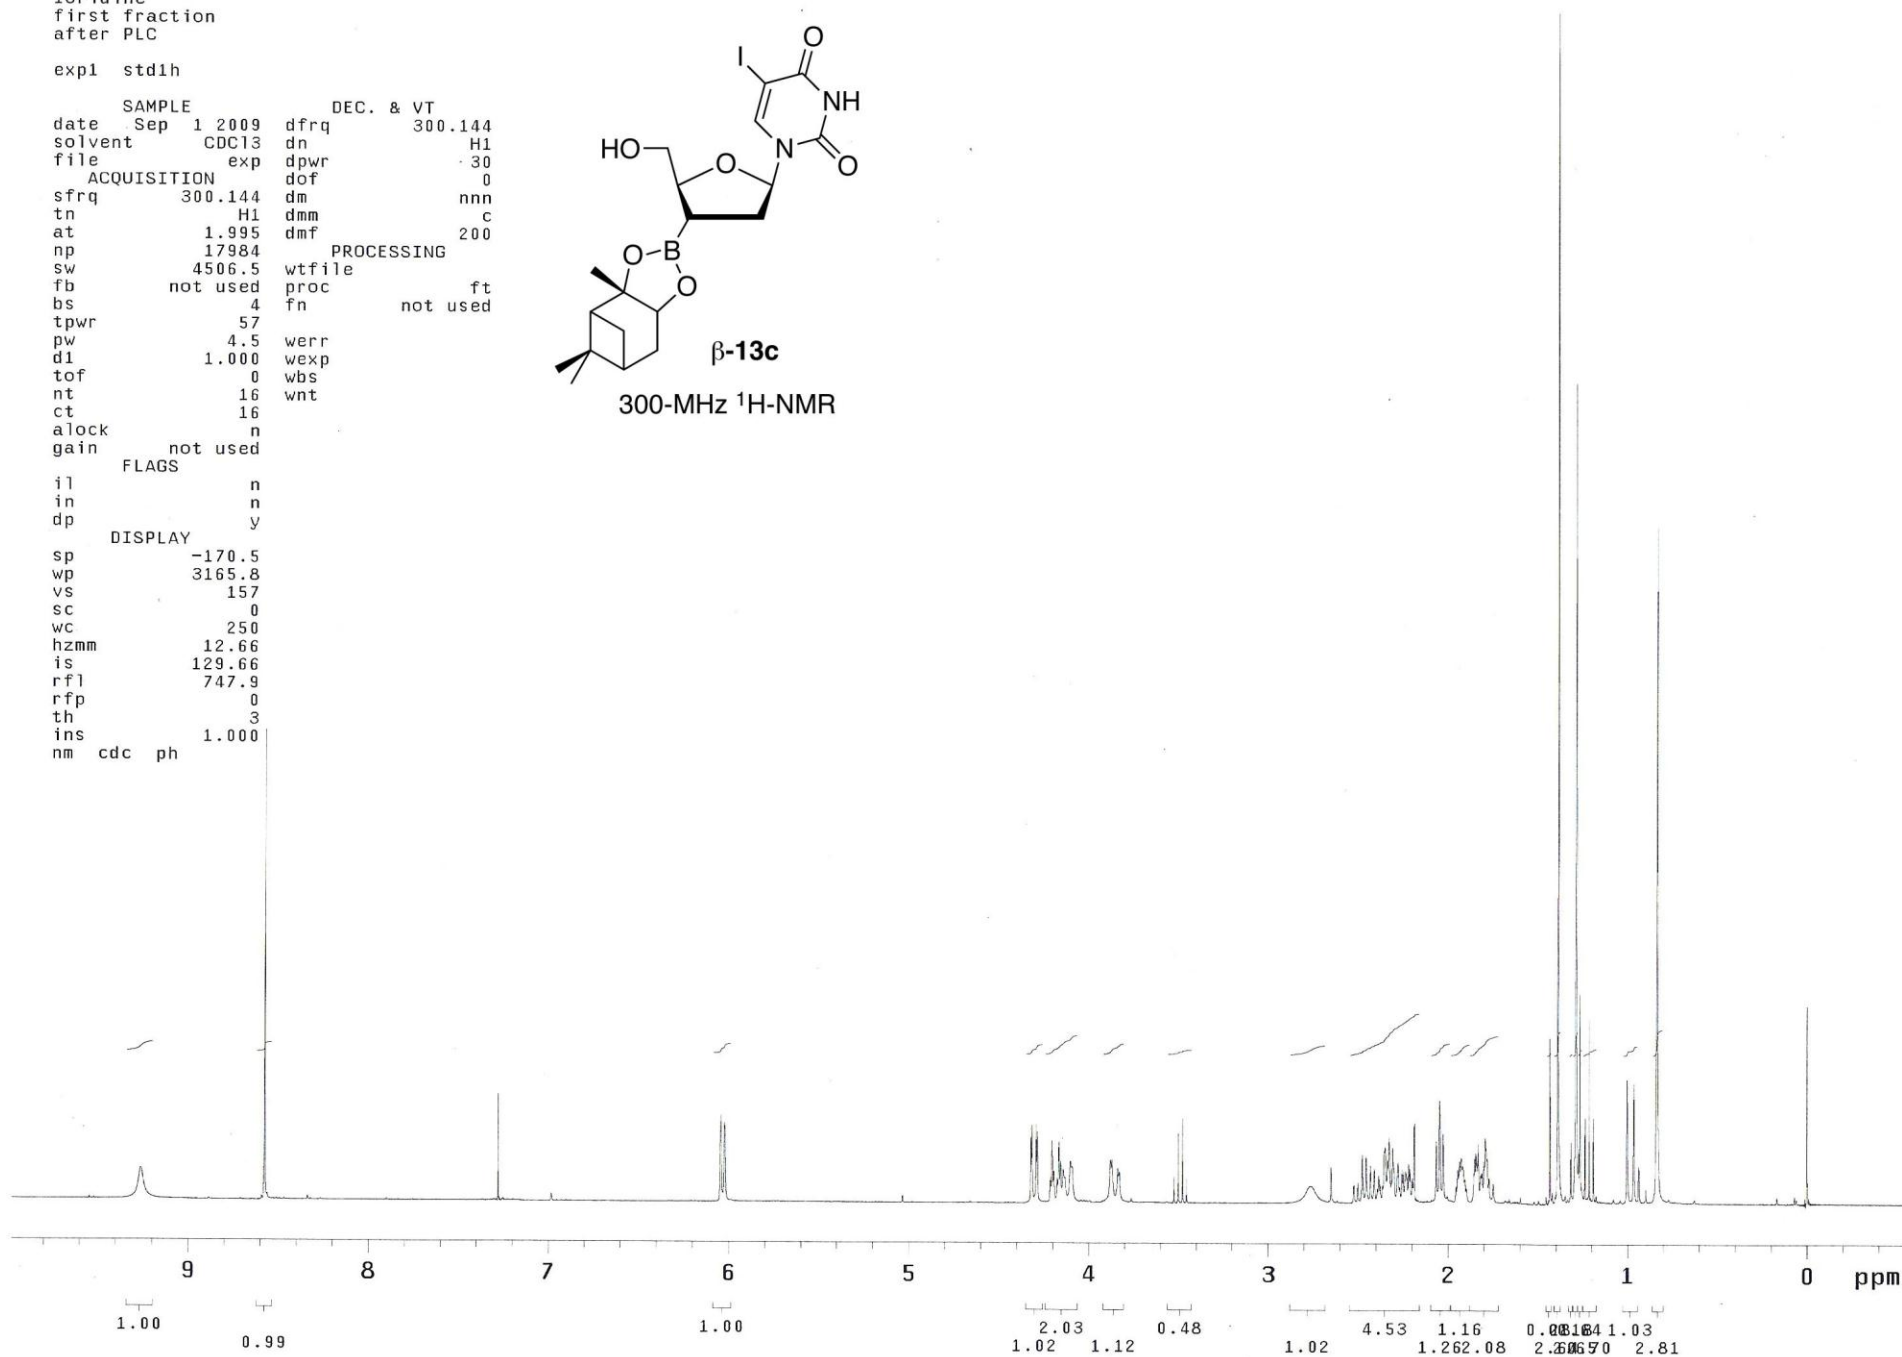

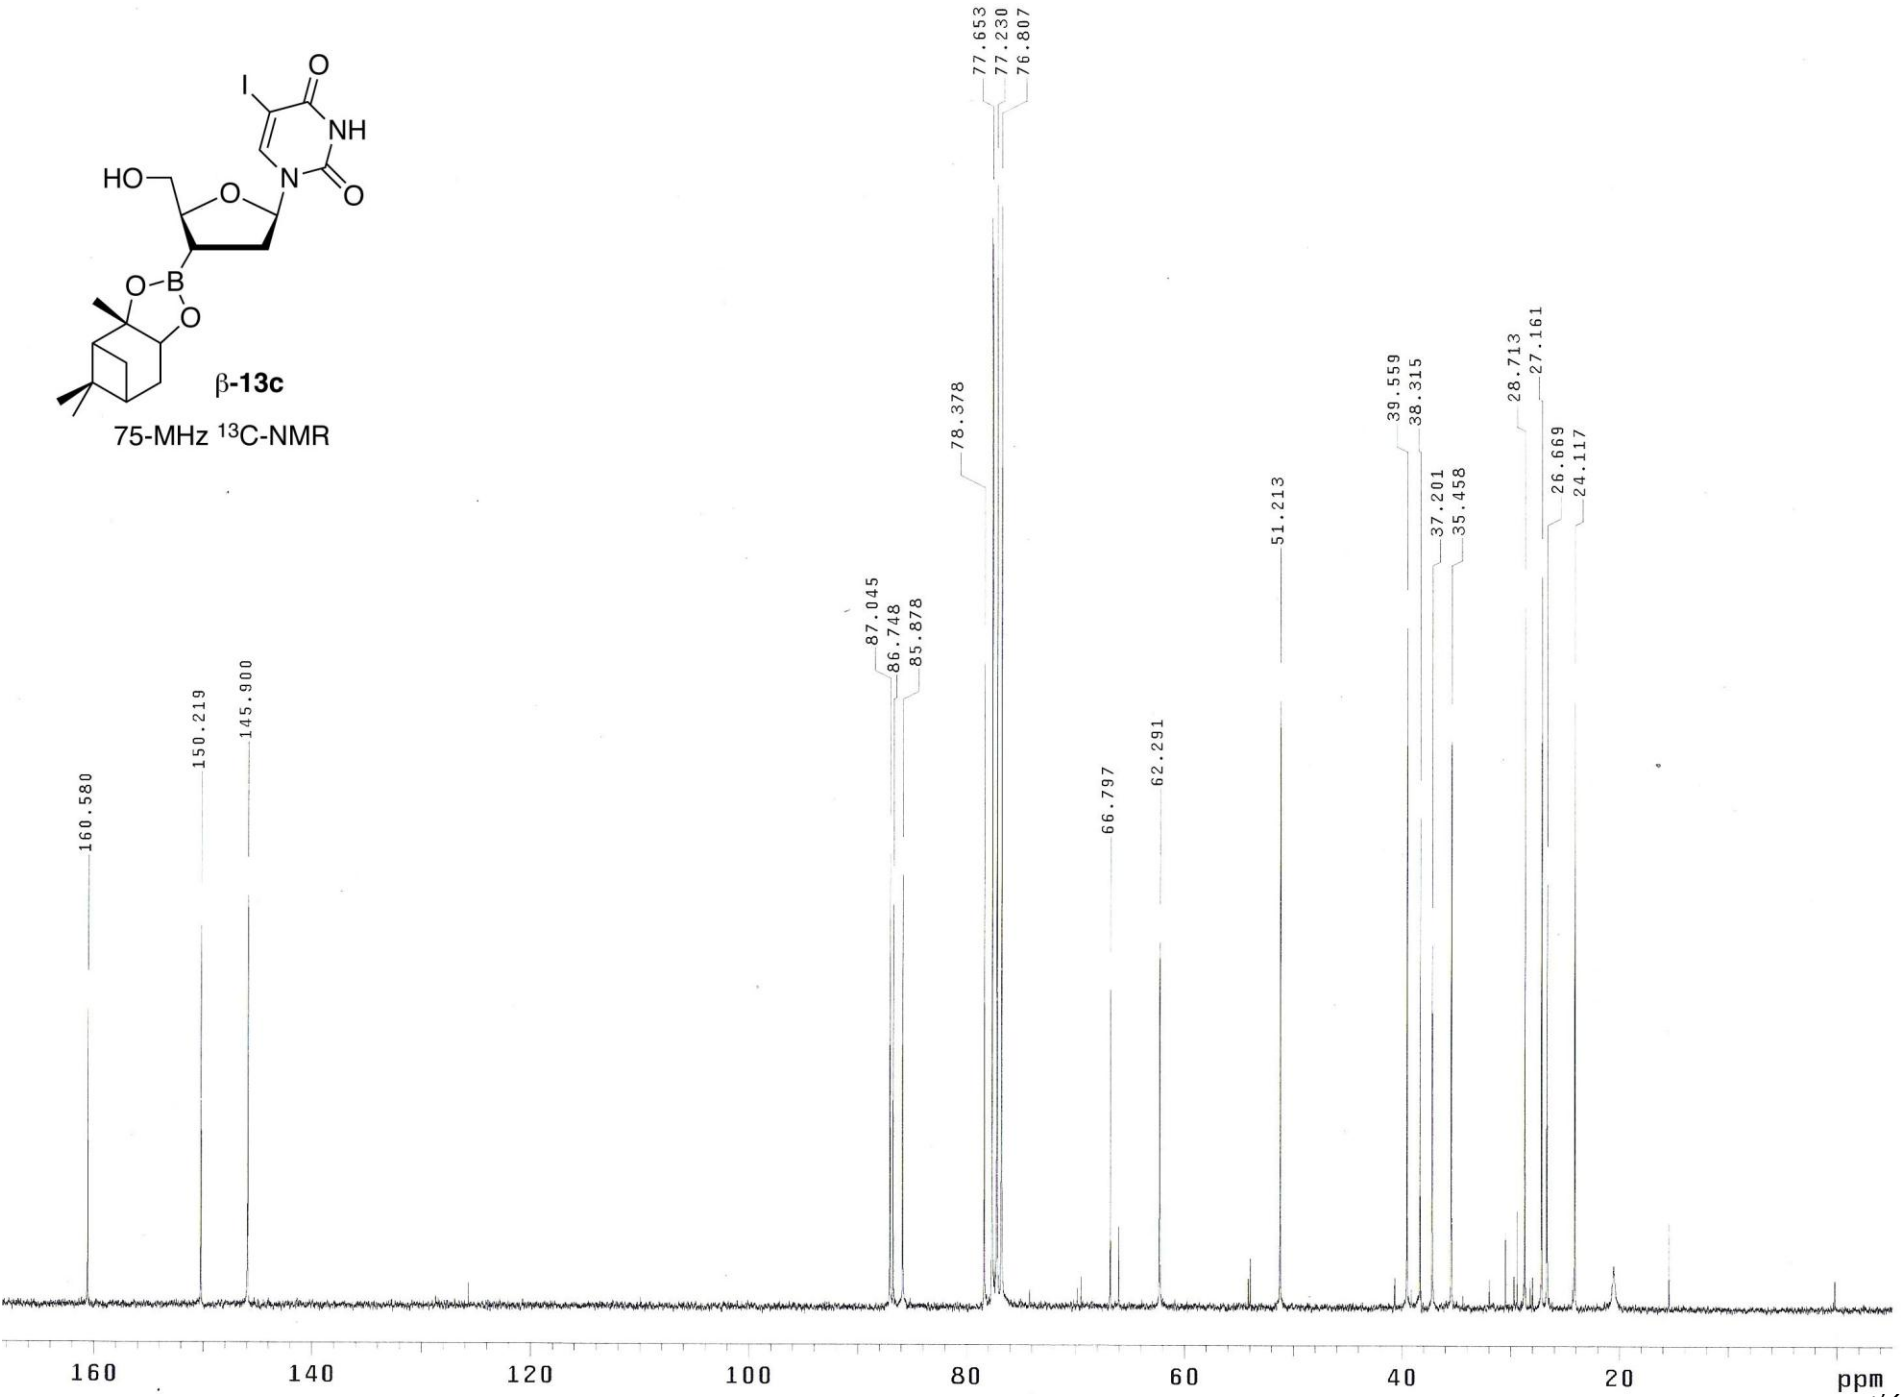

Desilated cytidine boronate  
HCl salt

exp5 s2pul

|             |             |            |          |
|-------------|-------------|------------|----------|
| SAMPLE      |             | SPECIAL    |          |
| date        | Oct 13 2009 | temp       | not used |
| solvent     | CD300       | gain       | not used |
| file        | exp         | spin       | not used |
| ACQUISITION |             | hst        | 0.008    |
| sw          | 4803.1      | pw90       | 9.800    |
| at          | 1.998       | alfa       | 20.000   |
| np          | 19192       | FLAGS      |          |
| fb          | not used    | il         | n        |
| bs          | 4           | in         | n        |
| d1          | 1.000       | dp         | y        |
| nt          | 16          | hs         | nn       |
| ct          | 16          | PROCESSING |          |
| TRANSMITTER |             | fn         | not used |
| tn          | H1          | DISPLAY    |          |
| sfrq        | 300.145     | sp         | -899.8   |
| tof         | 1.3         | wp         | 4803.1   |
| tpwr        | 57          | rfl        | 899.8    |
| pw          | 4.900       | rfl        | 0        |
| DECOUPLER   |             | rp         | 62.3     |
| dn          | C13         | lp         | -60.2    |
| dof         | 0           | PLOT       |          |
| dm          | nnn         | wc         | 250      |
| dmm         | c           | sc         | 0        |
| dpwr        | 39          | vs         | 126      |
| dmf         | 13100       | th         | 15       |
|             |             | ai         | cdc ph   |

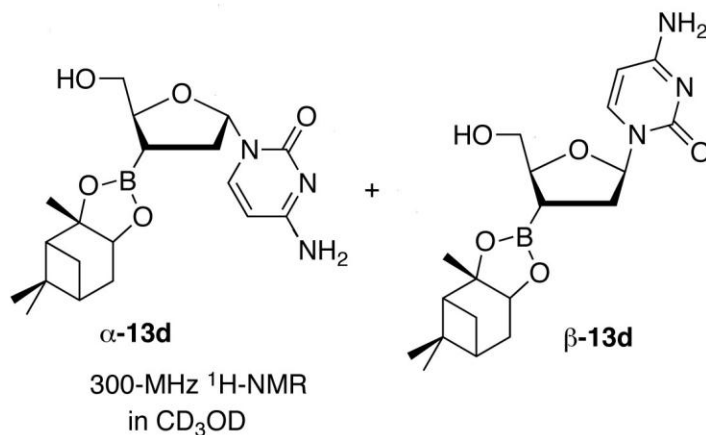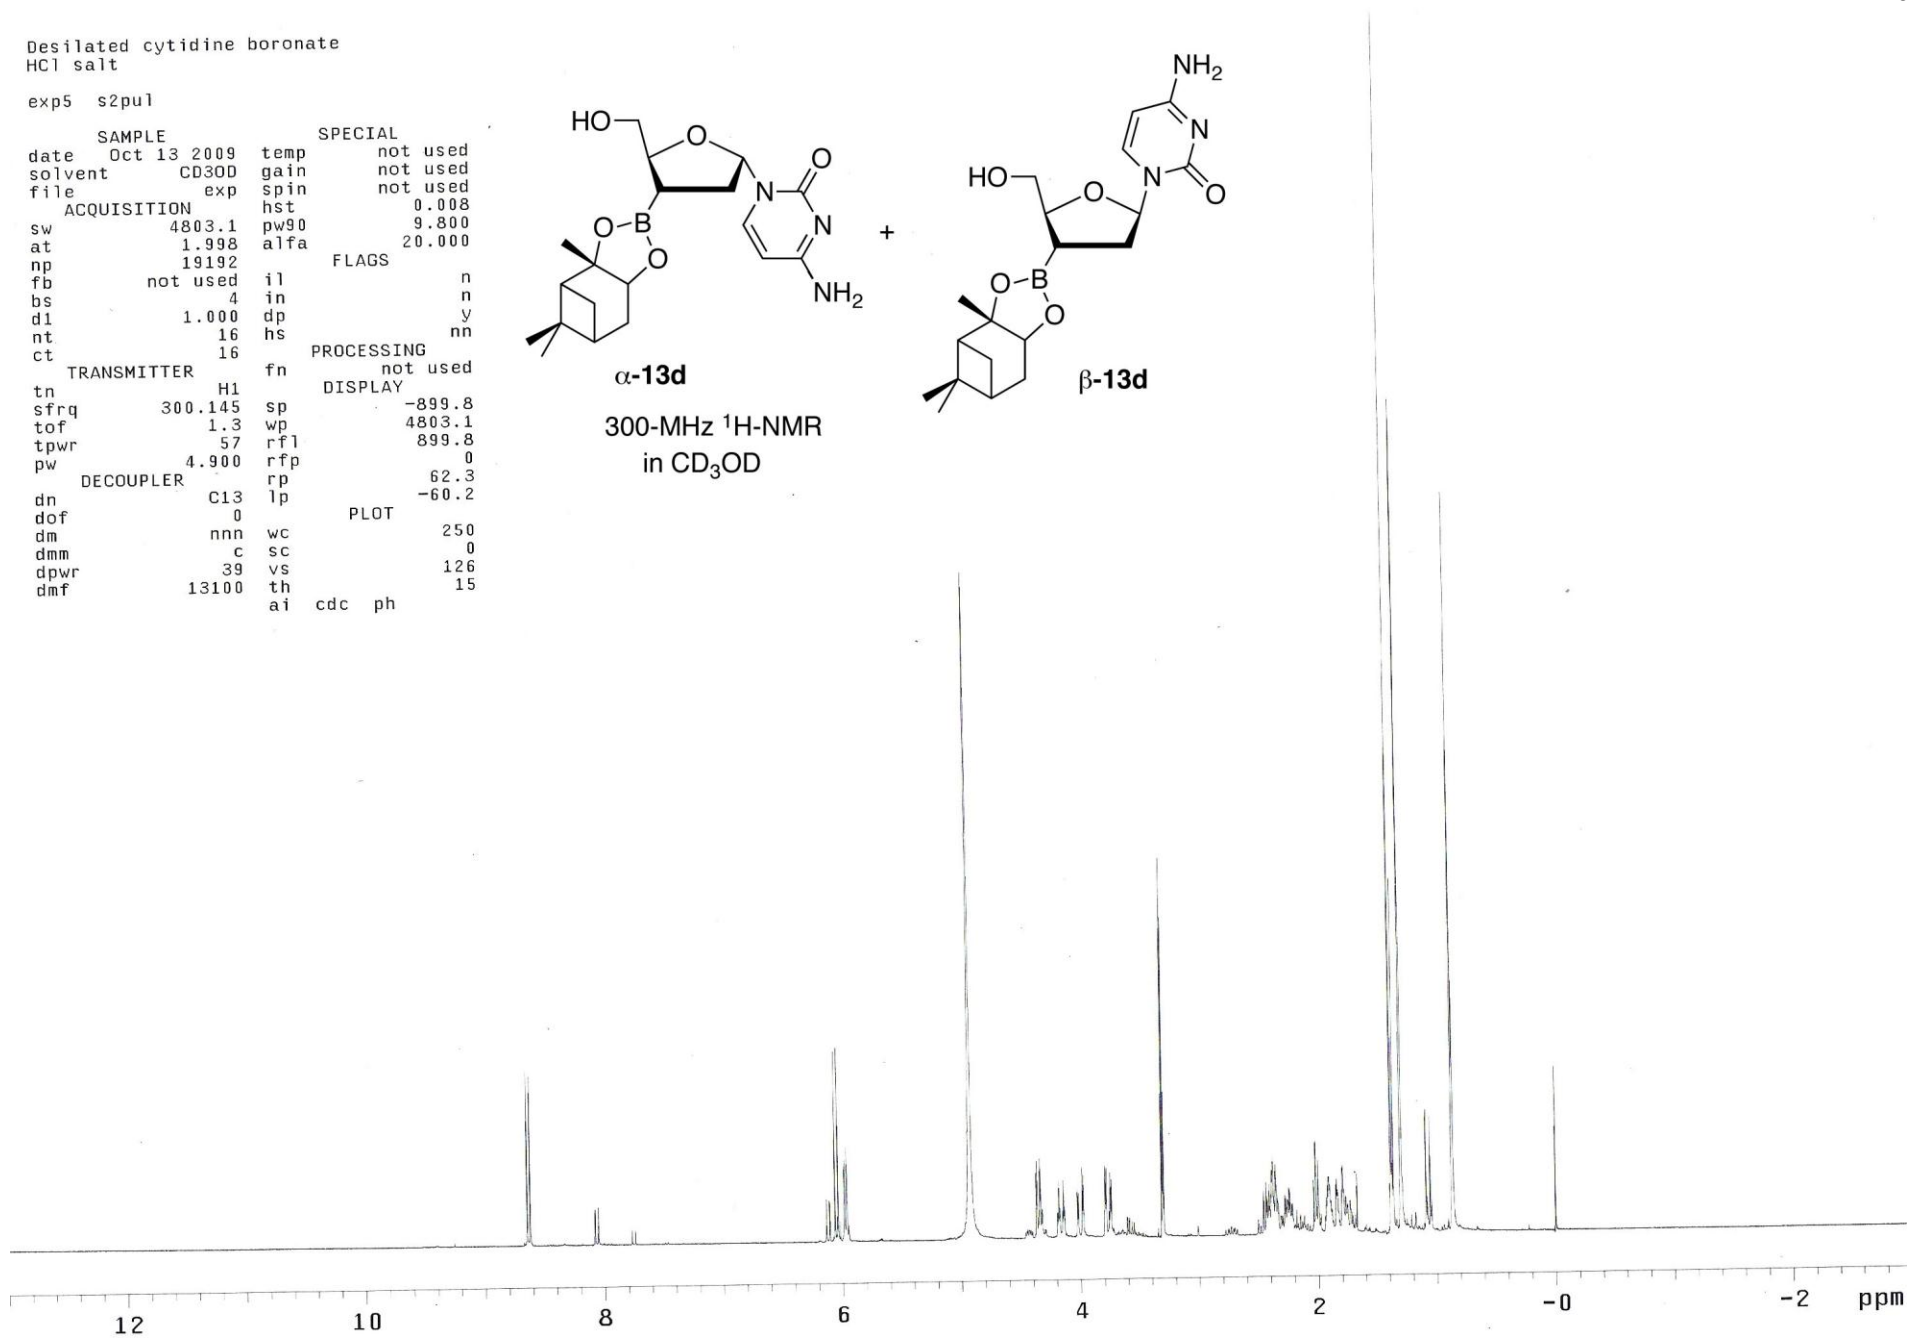

3-DeoxyThymidine boronic acid  
2nd batch  
300\_Thymidine\_BOH\_H

exp5 s2pu1

| SAMPLE      |             | SPECIAL    |          |
|-------------|-------------|------------|----------|
| date        | May 12 2009 | temp       | not used |
| solvent     | CD3OD       | gain       | not used |
| file        | exp         | spin       | not used |
| ACQUISITION |             |            |          |
| sw          | 4803.1      | hst        | 0.008    |
| at          | 1.998       | pw90       | 9.800    |
| np          | 19192       | alfa       | 20.000   |
| TRANSMITTER |             | PROCESSING |          |
| tn          | H1          | fn         | not used |
| sfrq        | 300.145     | DISPLAY    |          |
| tof         | 1.3         | sp         | 225.9    |
| tpwr        | 57          | wp         | 2440.4   |
| pw          | 4.900       | rfl        | 898.7    |
| DECOUPLER   |             | rpf        | 0        |
| dn          | C13         | rp         | 67.2     |
| dof         | 0           | lp         | -51.8    |
| dm          | nnn         | PLOT       |          |
| dmm         | c           | wc         | 250      |
| dpwr        | 39          | sc         | 0        |
| dmf         | 13100       | vs         | 113      |
|             |             | th         | 3        |
|             |             | ai         | cdc ph   |

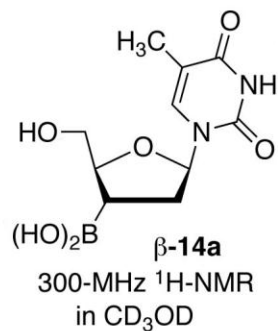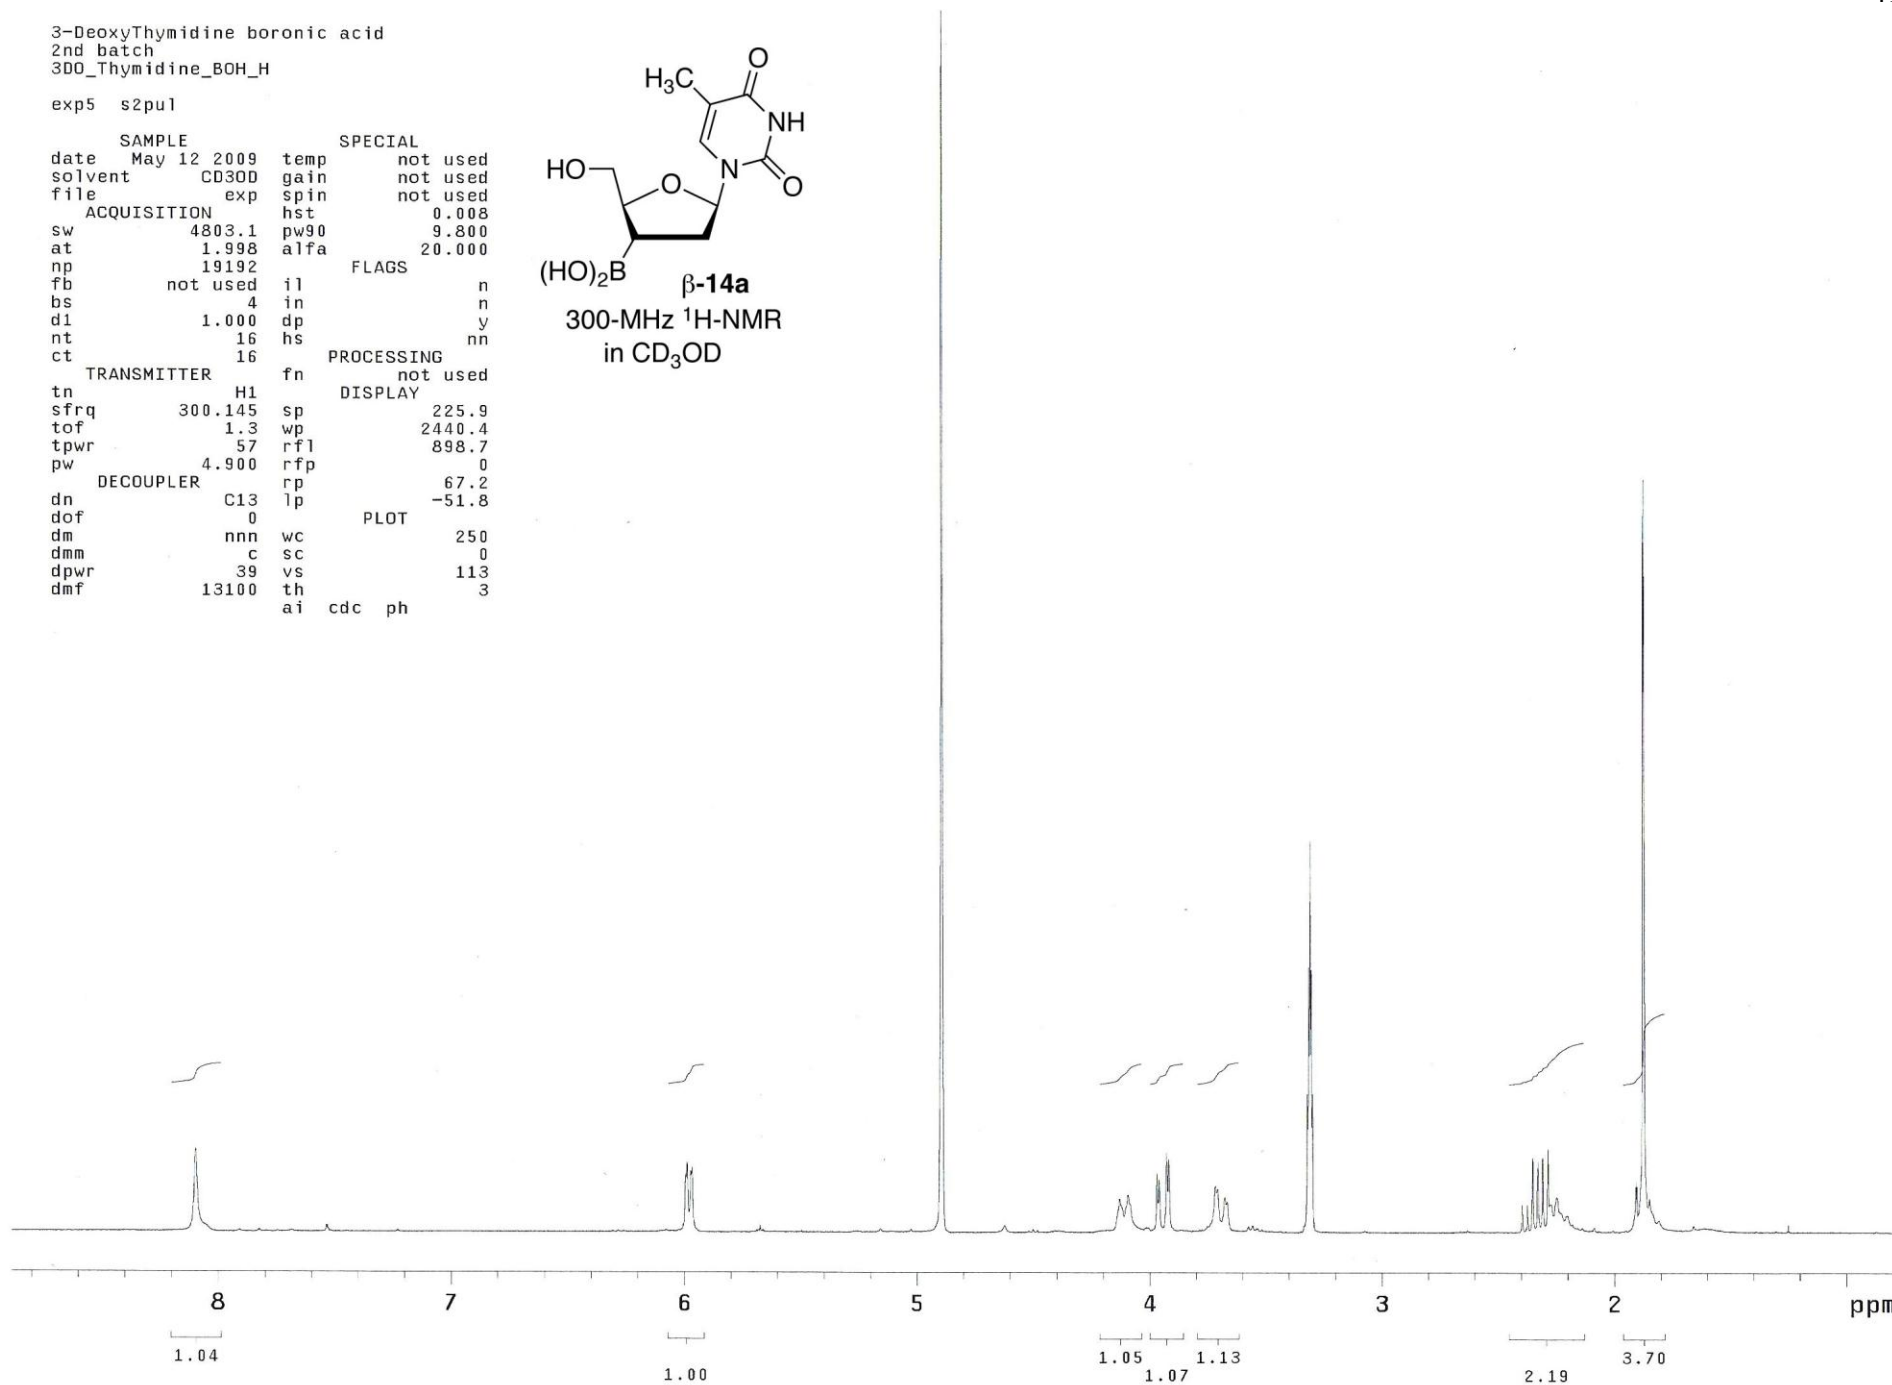

Thymidine boronic acid **a** in D<sub>2</sub>O  
After transesterification w/o acid

Pulse Sequence: s2pu1

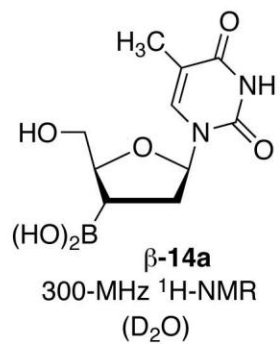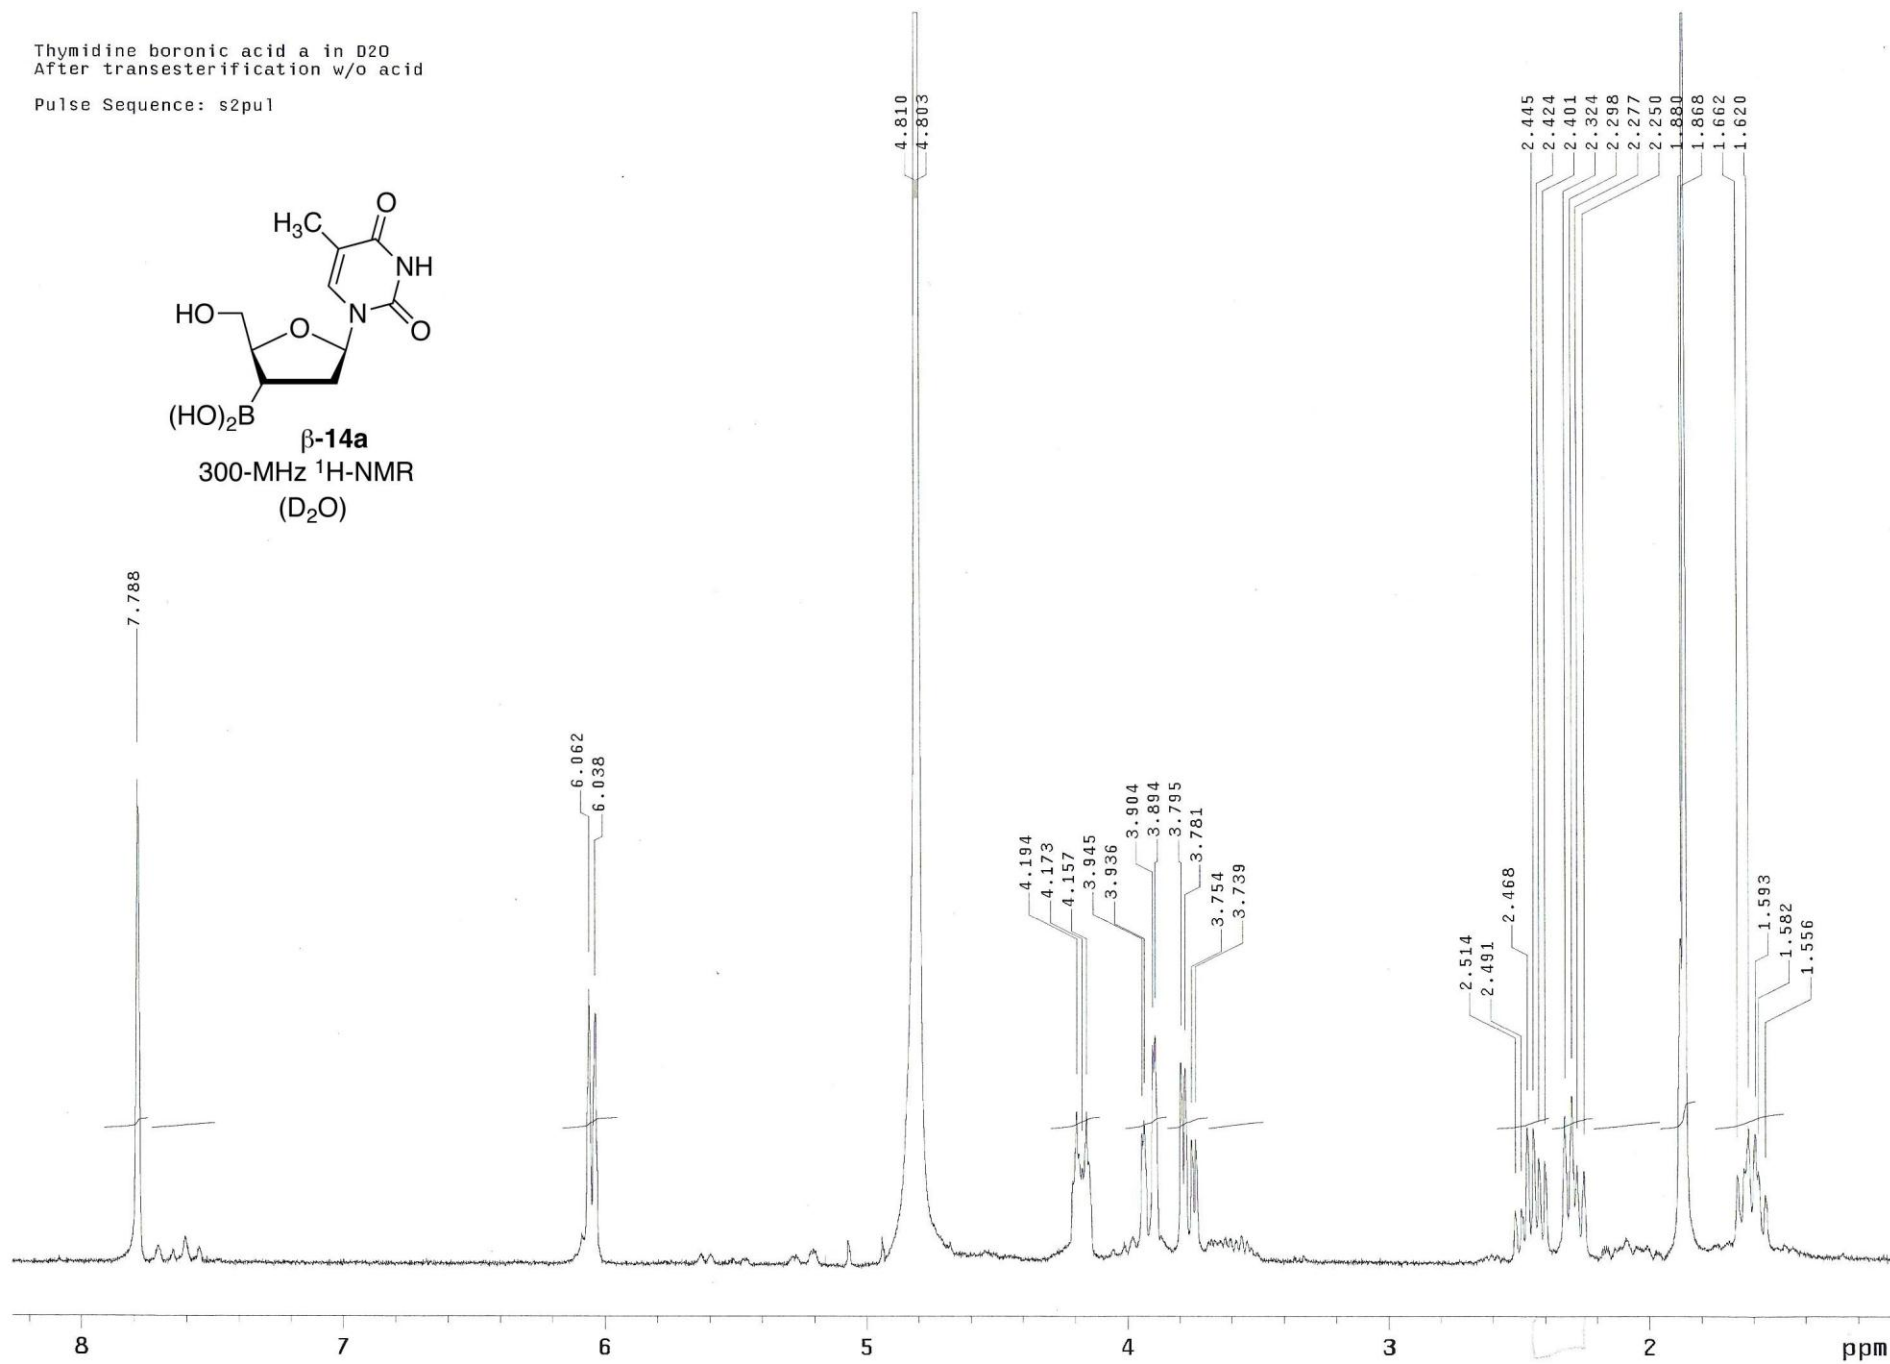

b-Thymidine boronic acid, 11B

exp3 s2pul

|             |             |           |            |
|-------------|-------------|-----------|------------|
| SAMPLE      |             | DEC. & VT |            |
| date        | Jul 13 2009 | dfrq      | 499.861    |
| solvent     | CD3OD       | dn        | H1         |
| file        | exp         | dpwr      | 43         |
| ACQUISITION |             | dof       | 0          |
| sfrq        | 160.377     | dm        | nyy        |
| tn          | 811         | dmm       | w          |
| at          | 0.200       | dmf       | 9940       |
| np          | 10000       | dseq      |            |
| sw          | 25000.0     | dres      | 1.0        |
| fb          | 14000       | homo      | n          |
| bs          | 32          | temp      | 22.0       |
| tpwr        | 57          |           | DEC2       |
| pw          | 5.5         | dfrq2     | 0          |
| d1          | 1.000       | dn2       |            |
| tof         | 7915.4      | dpwr2     | 1          |
| nt          | 1000        | dof2      | 0          |
| ct          | 672         | dm2       | n          |
| alock       | n           | dmm2      | c          |
| gain        | not used    | dmf2      | 9900       |
| FLAGS       |             | dseq2     |            |
| il          | n           | dres2     | 1.0        |
| in          | n           | homo2     | n          |
| dp          | y           |           | DEC3       |
| hs          | nn          | dfrq3     | 0          |
| DISPLAY     |             | dn3       |            |
| sp          | -9448.2     | dpwr3     | 1          |
| wp          | 24998.5     | dof3      | 0          |
| vs          | 140         | dm3       | n          |
| sc          | 0           | dmm3      | c          |
| wc          | 250         | dmf3      | 9900       |
| hzmm        | 99.99       | dseq3     |            |
| is          | 500.00      | dres3     | 1.0        |
| rfl         | 9449.8      | homo3     | n          |
| rtp         | 0           |           | PROCESSING |
| th          | 6           | lb        | 7.80       |
| ins         | 100.000     | wtfile    |            |
| nm          | cdc ph      | proc      | ft         |
|             |             | fn        | 32768      |
|             |             | math      | f          |
|             |             | werr      |            |
|             |             | wexp      |            |
|             |             | wbs       |            |
|             |             | wnt       |            |

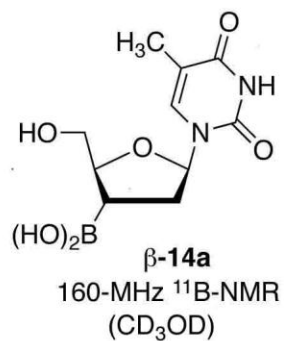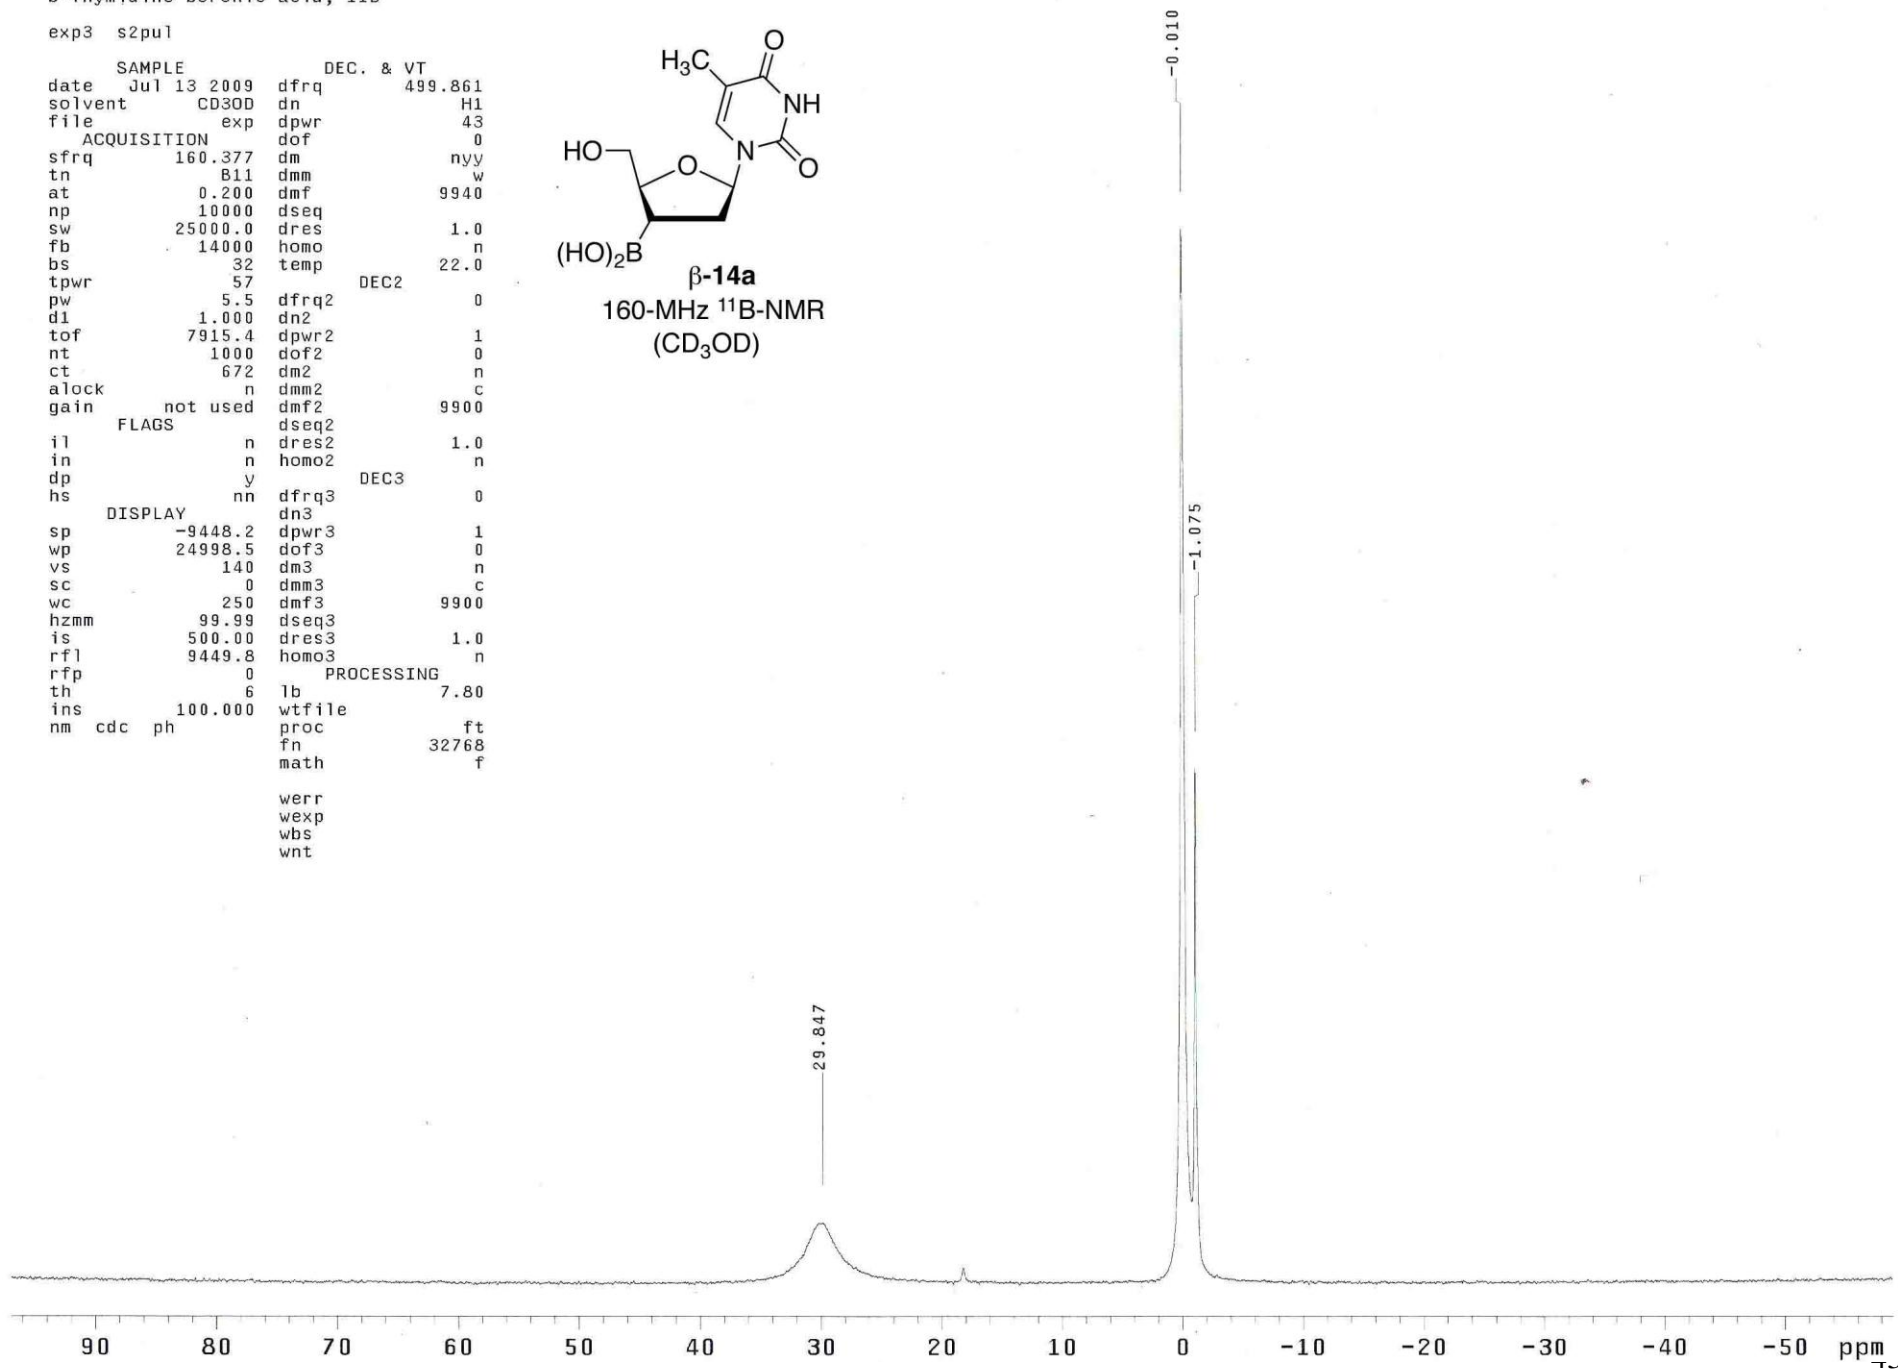

3-Deoxythymidine boronic acid  
in CD<sub>3</sub>OH for <sup>13</sup>C

Archive directory: /export/home/kim/vnmrsys/data  
Sample directory: 300\_Thymidine\_BOH\_C\_12May2009  
File: CARBON

Pulse Sequence: s2pu1

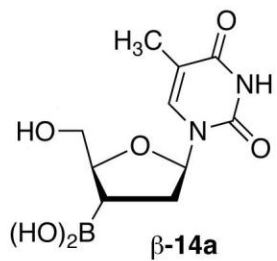

75-MHz <sup>13</sup>C-NMR  
(CD<sub>3</sub>OD)

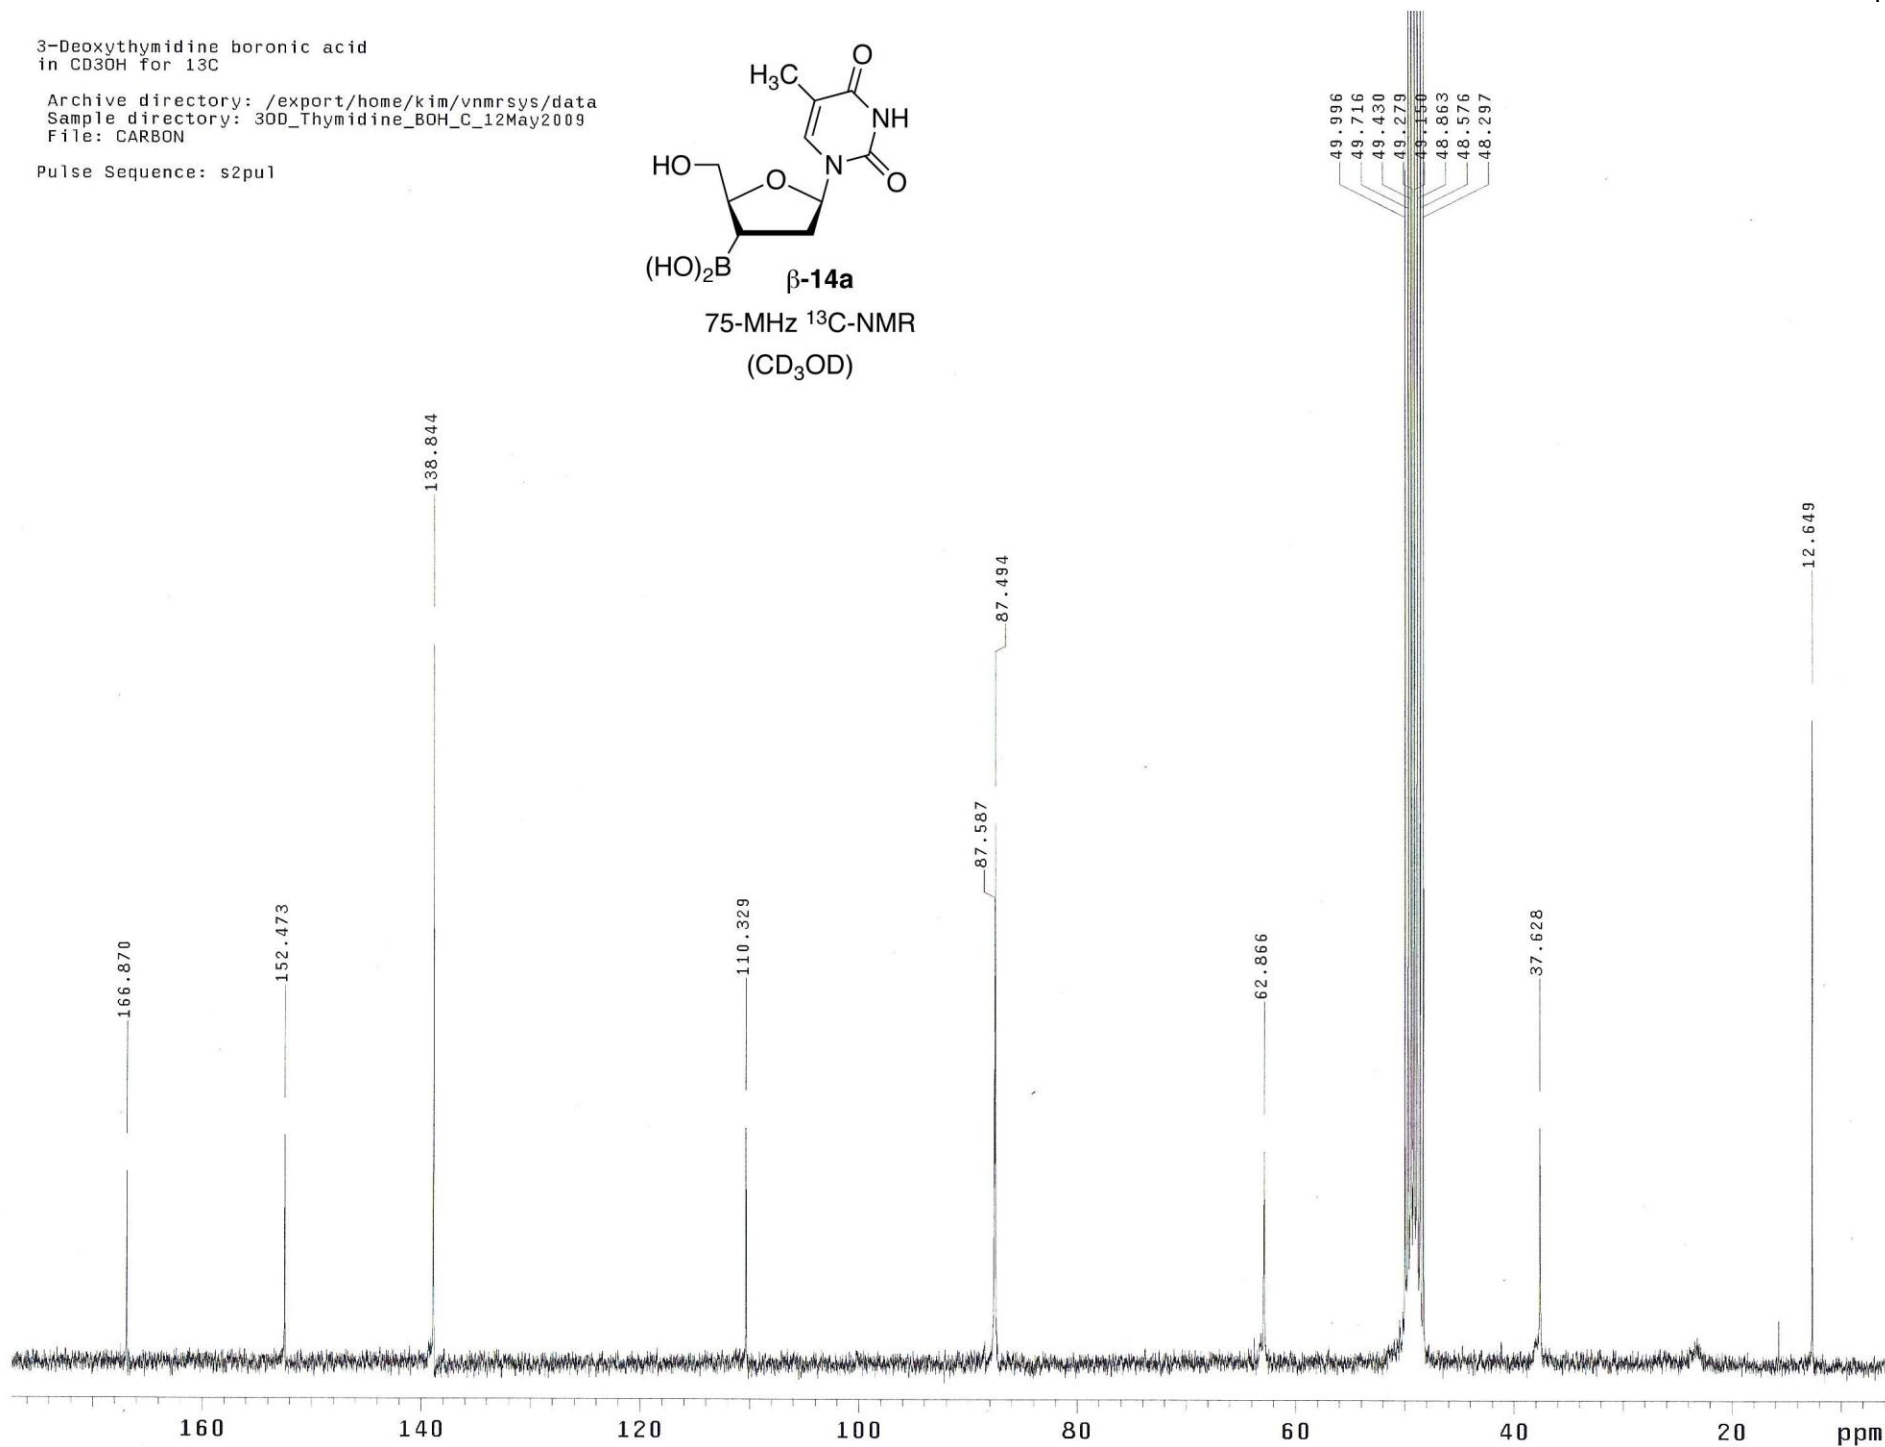

3'-Deoxy-5-fluorouridine  
Stability test on 8/16/09  
1300

exp4 std1h

|             |             |            |          |
|-------------|-------------|------------|----------|
| SAMPLE      |             | DEC. & VT  |          |
| date        | Aug 16 2009 | dfrq       | 300.145  |
| solvent     | D2O         | dn         | H1       |
| file        | exp         | dpwr       | 30       |
| ACQUISITION |             | dof        | 0        |
| sfrq        | 300.145     | dm         | nnn      |
| tn          | H1          | dmm        | c        |
| at          | 1.995       | dmf        | 200      |
| np          | 17984       | PROCESSING |          |
| sw          | 4506.5      | wtfile     |          |
| fb          | not used    | proc       | ft       |
| bs          | 4           | fn         | not used |
| tpwr        | 57          |            |          |
| pw          | 4.5         | werr       |          |
| d1          | 1.000       | wexp       |          |
| tof         | 0           | wbs        |          |
| nt          | 16          | wnt        |          |
| ct          | 16          |            |          |
| alock       | n           |            |          |
| gain        | not used    |            |          |
| FLAGS       |             |            |          |
| il          | n           |            |          |
| in          | n           |            |          |
| dp          | y           |            |          |
| DISPLAY     |             |            |          |
| sp          | 175.3       |            |          |
| wp          | 2687.7      |            |          |
| vs          | 11995       |            |          |
| sc          | 0           |            |          |
| wc          | 250         |            |          |
| hzmm        | 10.75       |            |          |
| is          | 409.58      |            |          |
| rfl         | 707.4       |            |          |
| rfp         | 0           |            |          |
| th          | 4           |            |          |
| ins         | 1.000       |            |          |
| nm          | cdc ph      |            |          |

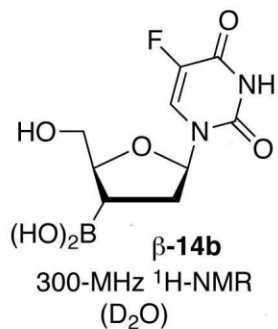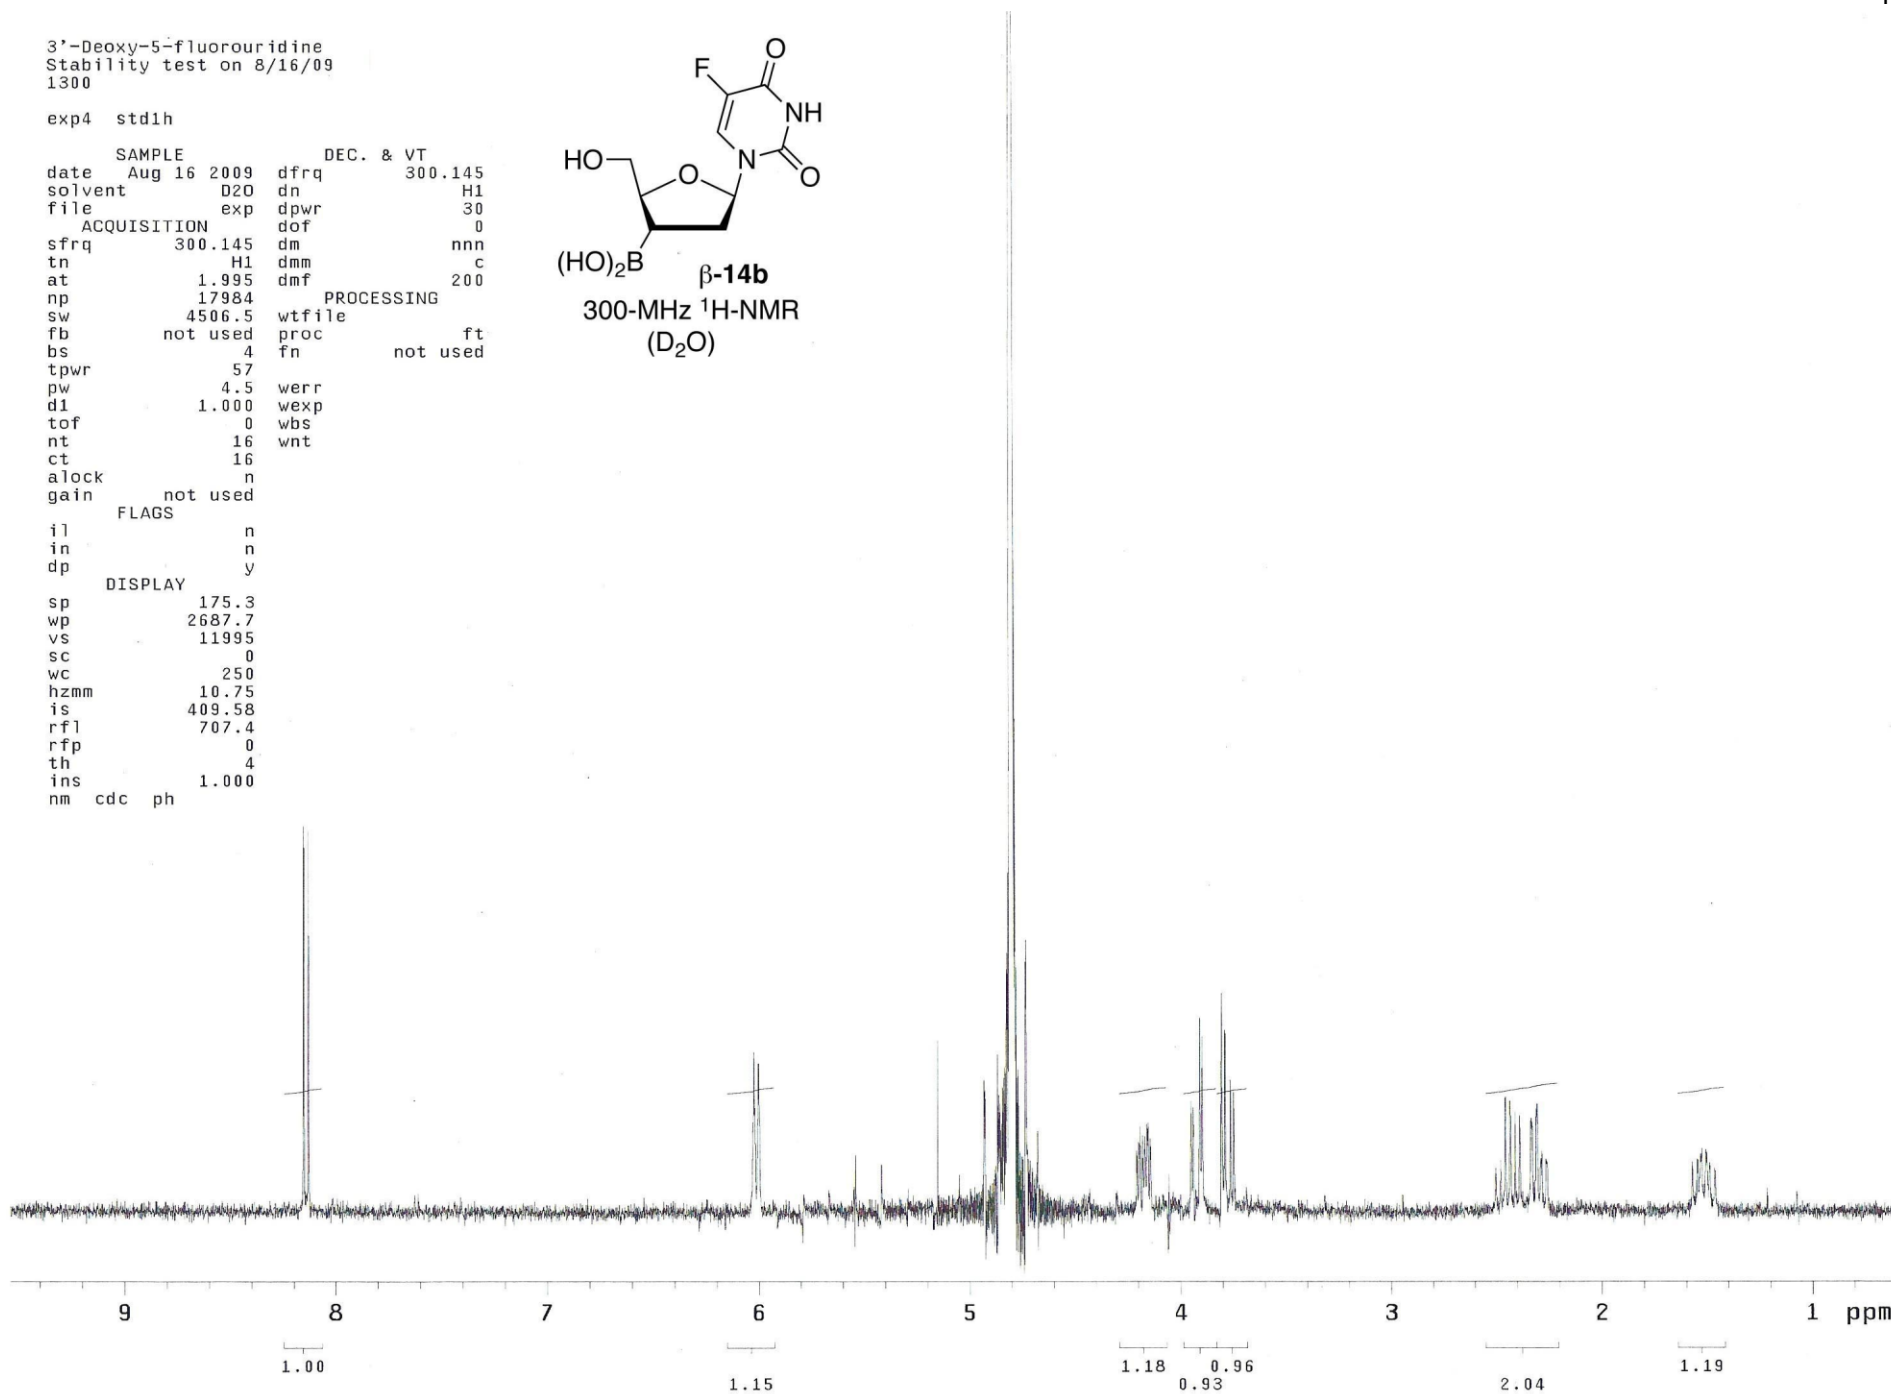

Furidine boronic acid, 11B

exp3 s2pu1

| SAMPLE      |             | DEC. & VT  |         |
|-------------|-------------|------------|---------|
| date        | Jul 13 2009 | dfrq       | 499.861 |
| solvent     | CD3OD       | dn         | H1      |
| file        | exp         | dpwr       | 43      |
| ACQUISITION |             |            |         |
| sfrq        | 160.377     | dm         | nyy     |
| tn          | 811         | dmm        | w       |
| at          | 0.200       | dmf        | 9940    |
| np          | 10000       | dseq       |         |
| sw          | 25000.0     | dres       | 1.0     |
| fb          | 14000       | homo       | n       |
| bs          | 32          | temp       | 22.0    |
| tpwr        | 57          |            |         |
| pw          | 5.5         | dfrq2      | 0       |
| d1          | 1.000       | dn2        |         |
| tof         | 7915.4      | dpwr2      | 1       |
| nt          | 1000        | dof2       | 0       |
| ct          | 128         | dm2        | n       |
| alock       | n           | dmm2       | c       |
| gain        | not used    | dmf2       | 9900    |
| FLAGS       |             |            |         |
| il          | n           | dseq2      |         |
| in          | n           | dres2      | 1.0     |
| dp          | y           | homo2      | n       |
| hs          | nn          |            |         |
| DISPLAY     |             | DEC3       |         |
| sp          | -9446.7     | dfrq3      | 0       |
| wp          | 24998.5     | dn3        |         |
| vs          | 218         | dpwr3      | 1       |
| sc          | 0           | dof3       | 0       |
| wc          | 250         | dm3        | n       |
| hzmm        | 99.99       | dmm3       | c       |
| is          | 500.00      | dmf3       | 9900    |
| rfl         | 9448.2      | dseq3      |         |
| rfl         | 0           | dres3      | 1.0     |
| th          | 6           | homo3      | n       |
| ins         | 100.000     | PROCESSING |         |
| nm          | cdc ph      | lb         | 7.80    |
|             |             | wfile      |         |
|             |             | proc       | ft      |
|             |             | fn         | 32768   |
|             |             | math       | f       |
|             |             | werr       |         |
|             |             | wexp       |         |
|             |             | wbs        |         |
|             |             | wnt        |         |

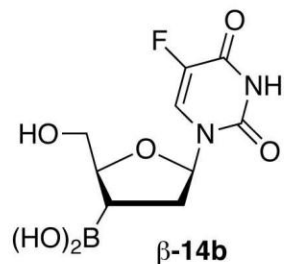

160-MHz <sup>11</sup>B-NMR  
(CD<sub>3</sub>OD)

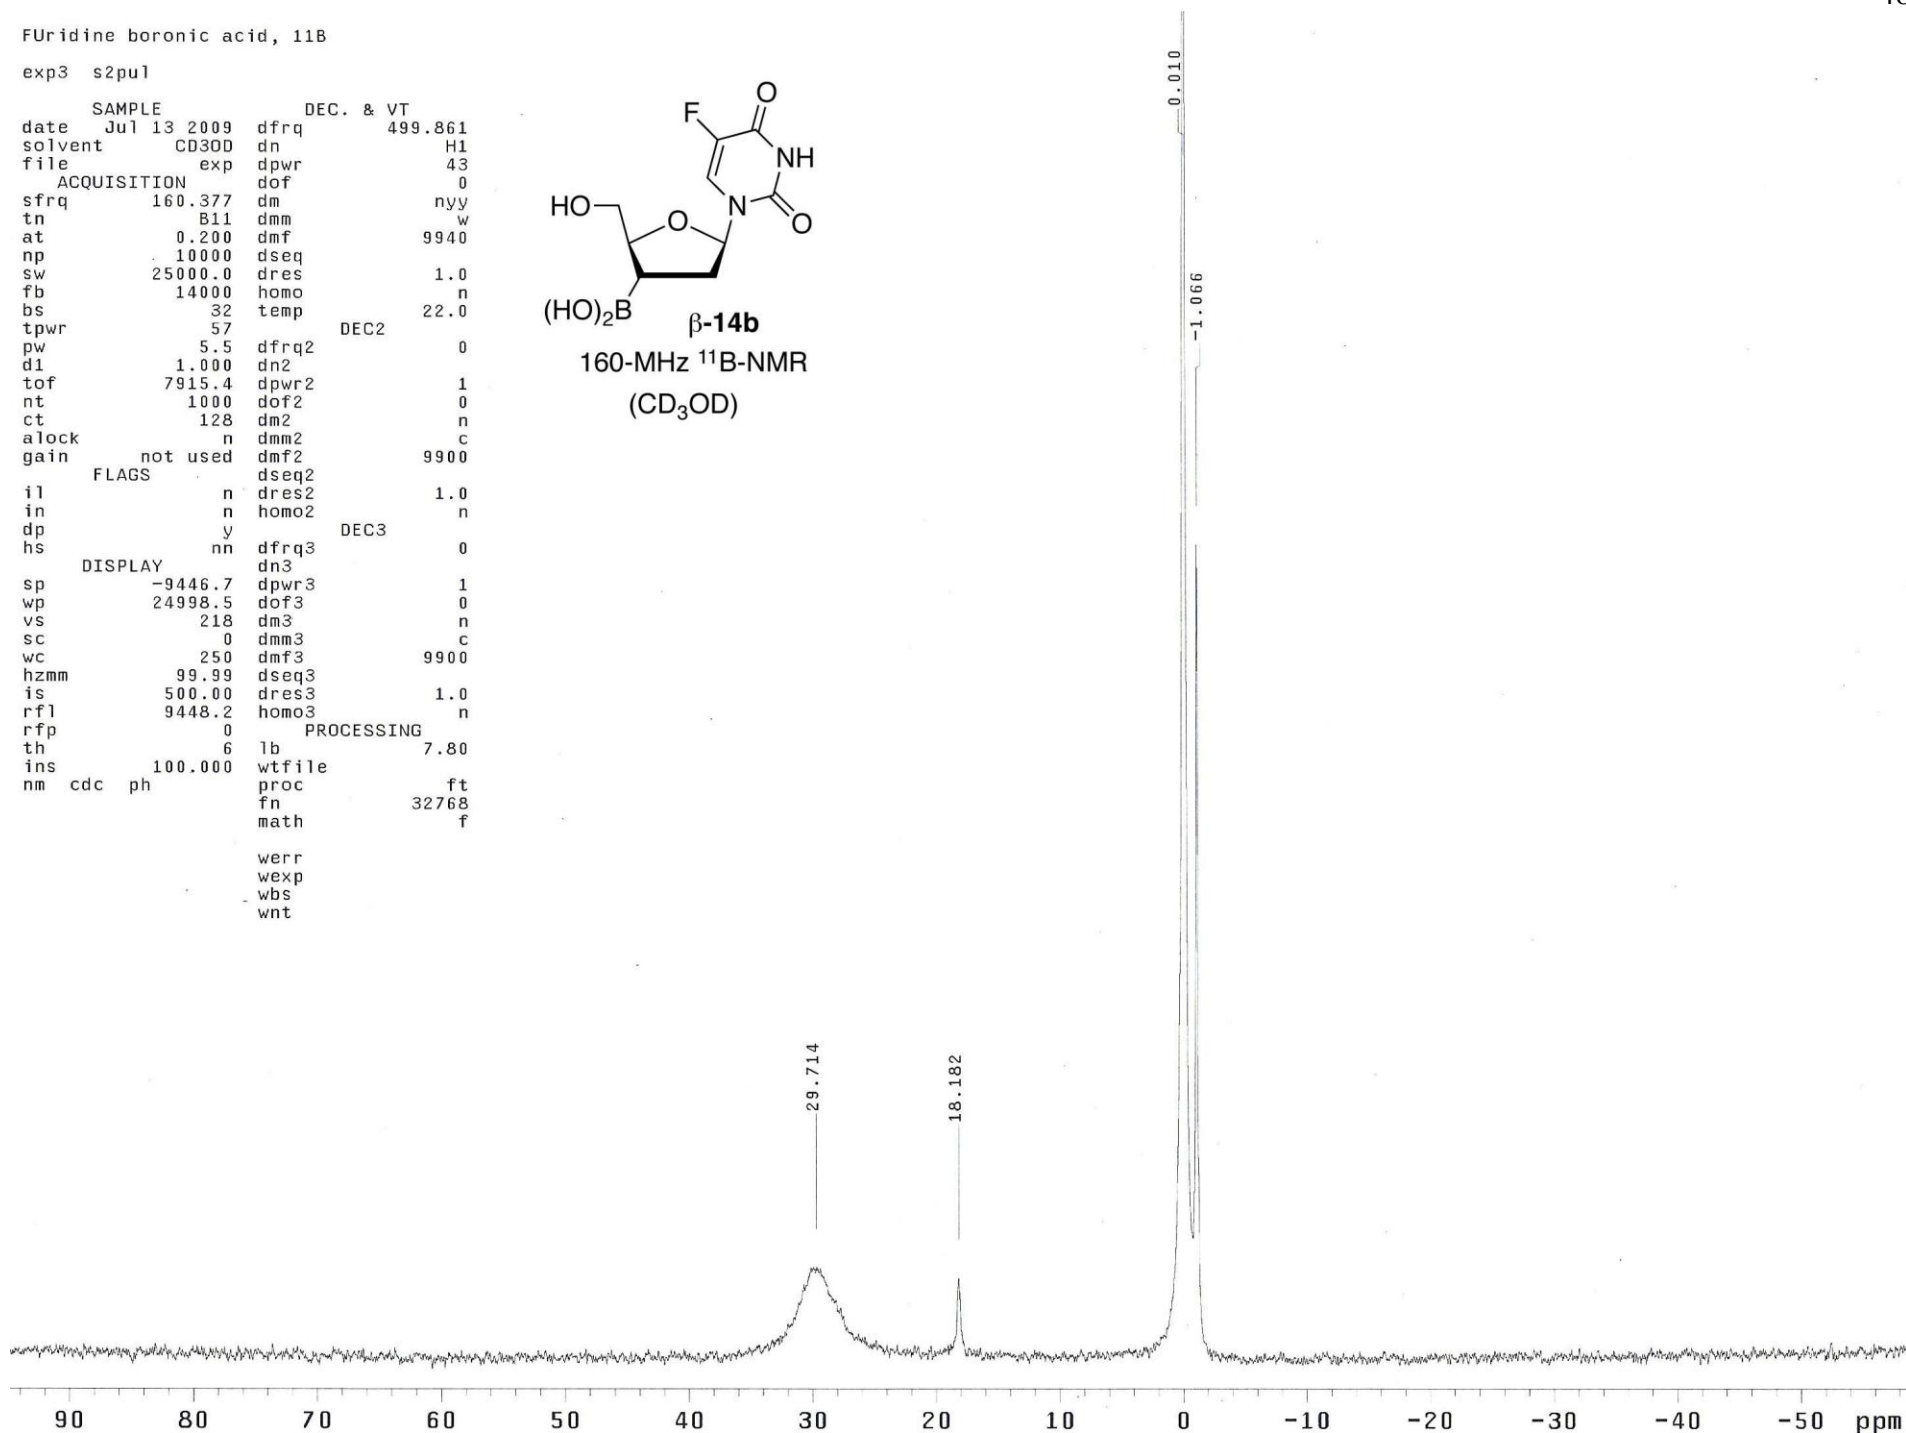

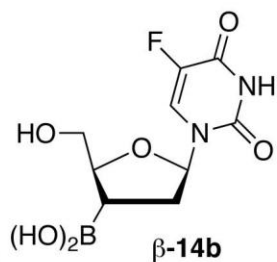

75-MHz <sup>13</sup>C-NMR  
(CD<sub>3</sub>OD)

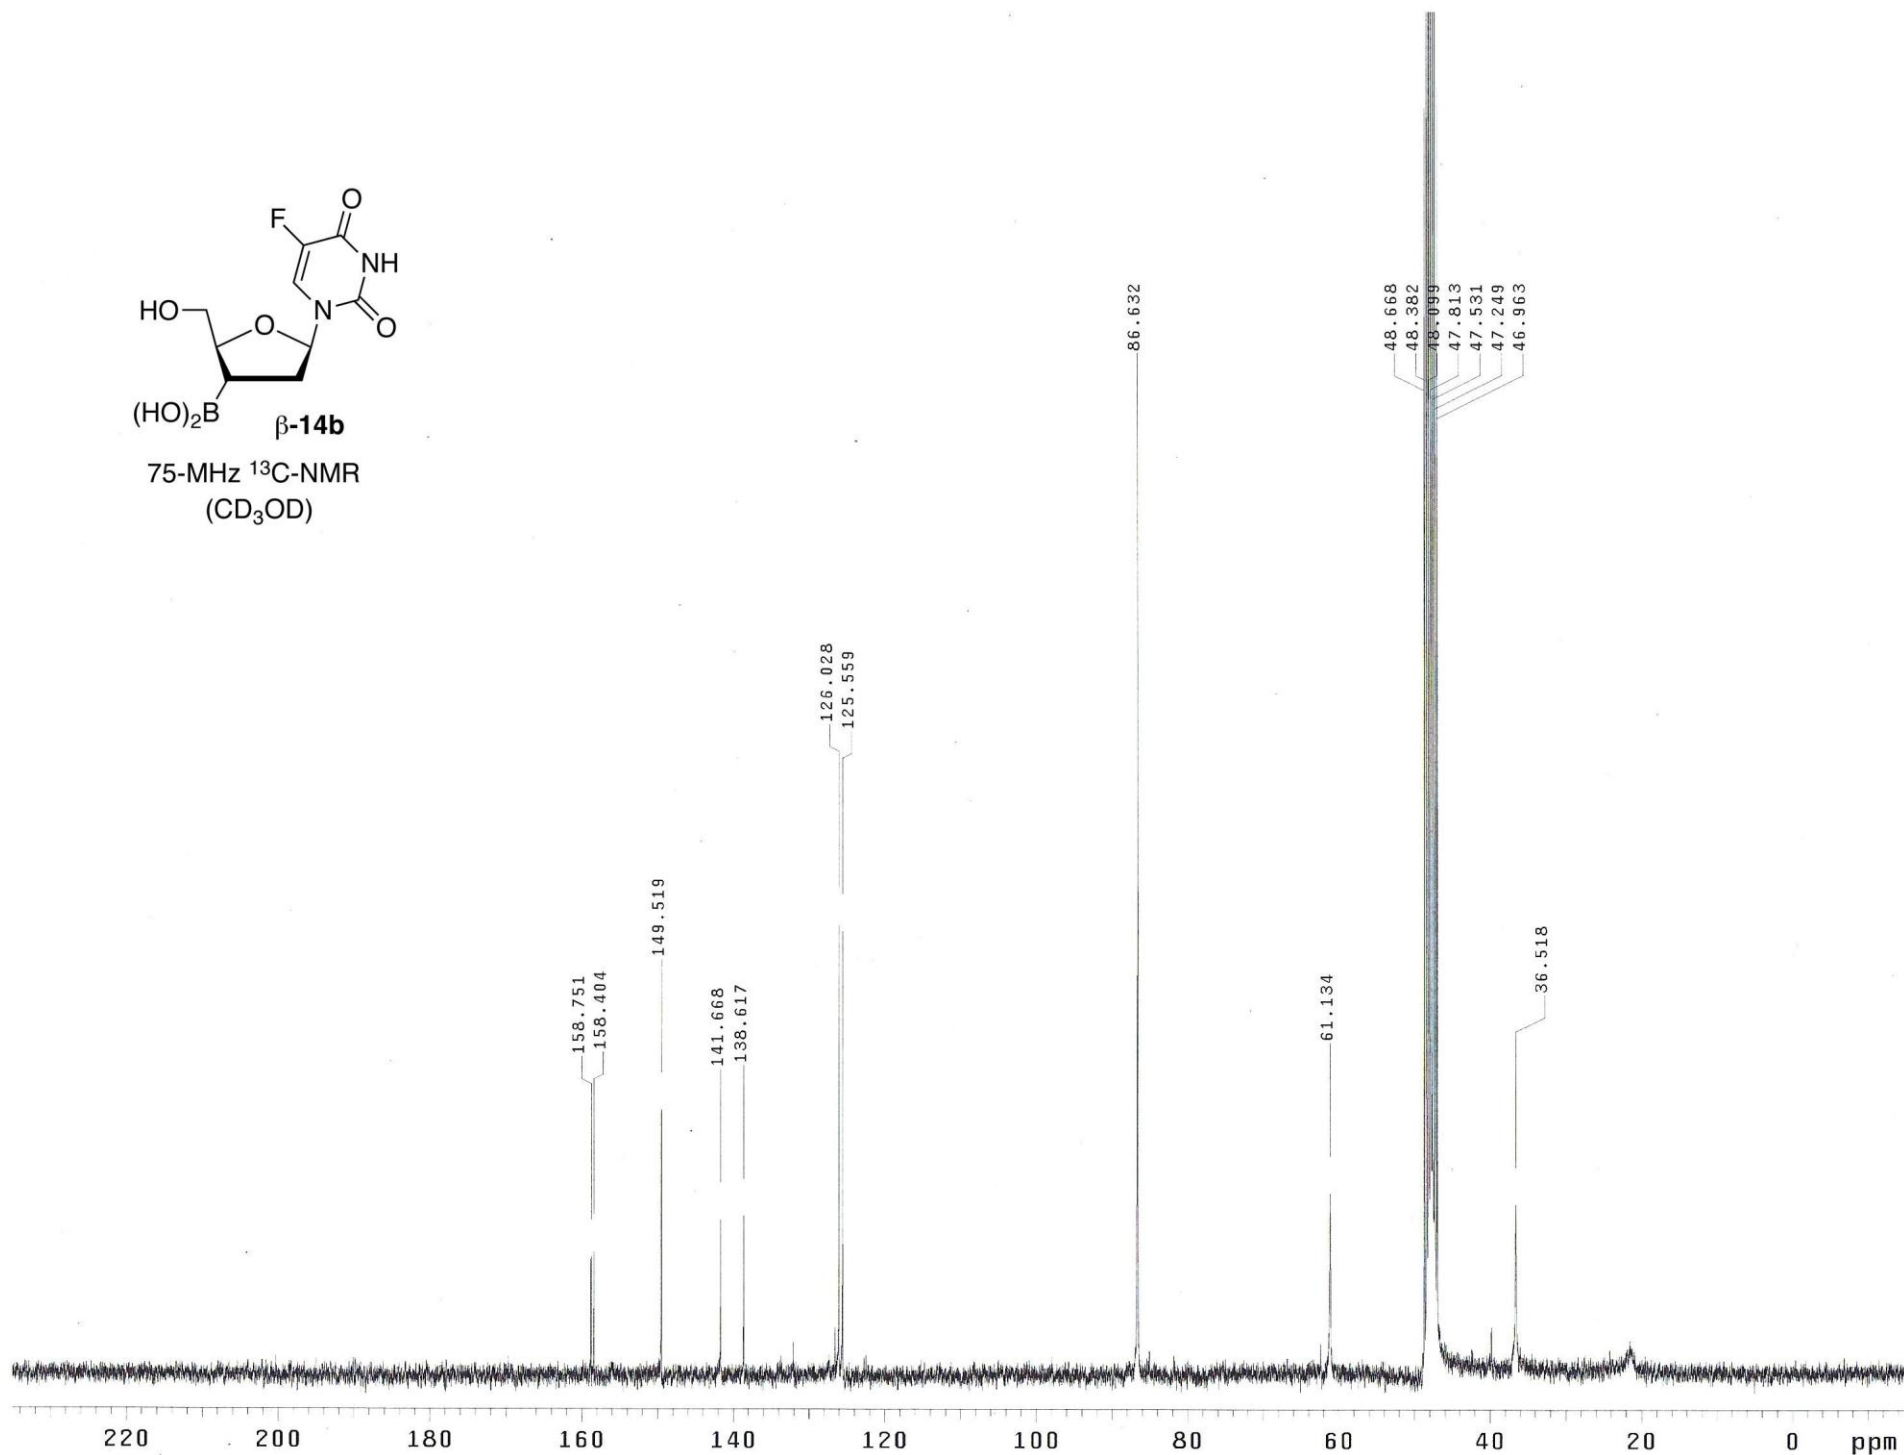

FUridine\_BOH\_F

Archive directory: /export/home/kim/vnmrsys/data  
Sample directory: FUridine\_BOHF\_07Jul2009

Pulse Sequence: s2pu1

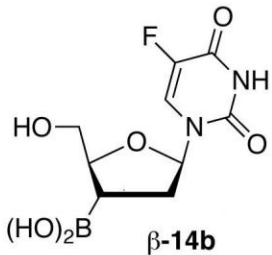

282-MHz <sup>19</sup>F-NMR  
(CD<sub>3</sub>OD)

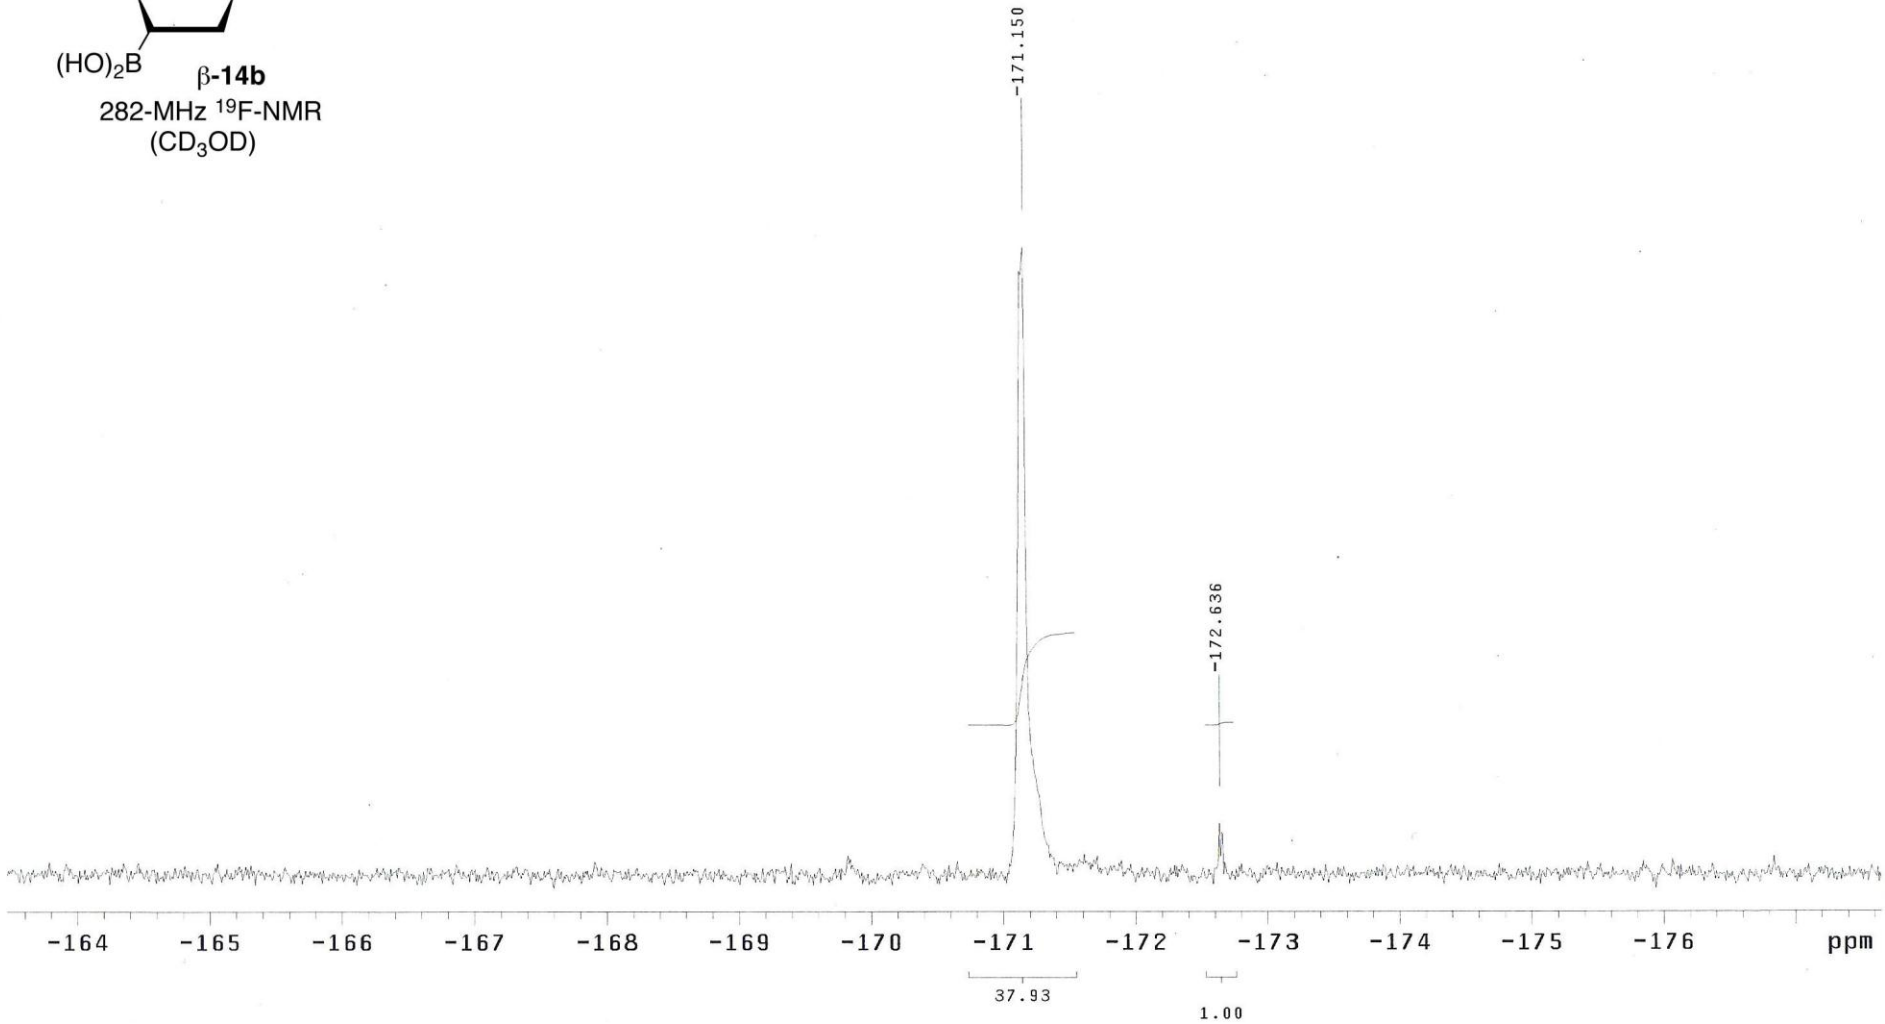

3'-deoxyiodouridine boronic acid  
a anomer

Archive directory: /export/home/kim/vnmr/sys/data  
Sample directory:  
File: PROTON

Pulse Sequence: s2pu1

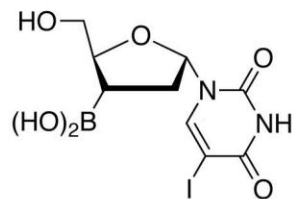

**$\alpha$ -14c**

300-MHz  $^1\text{H}$ -NMR  
( $\text{CD}_3\text{OD}$ )

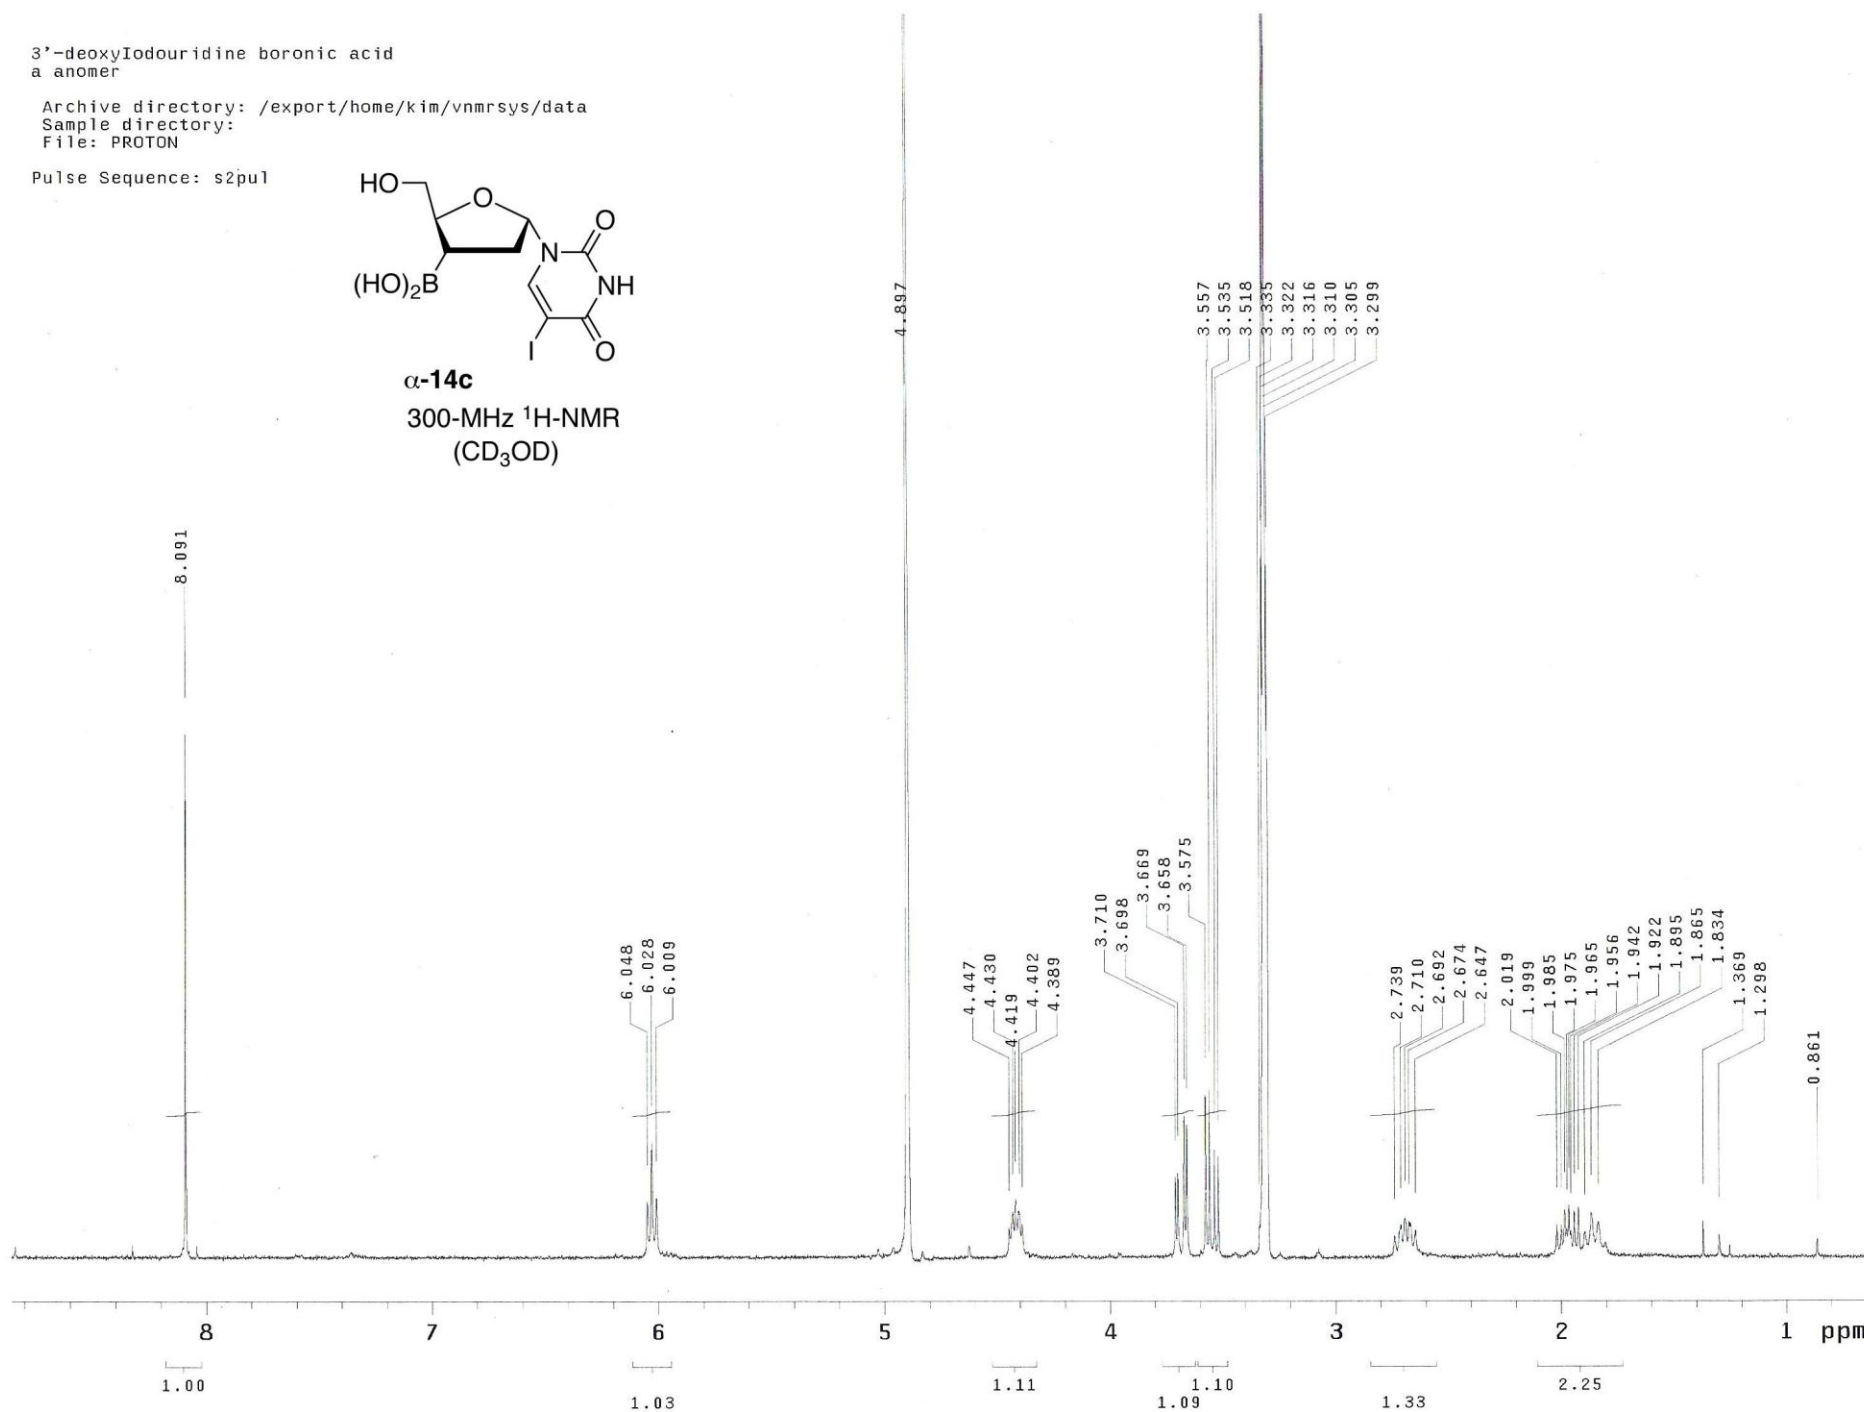

IUridine\_aBOH\_C

Archive directory: /export/home/kim/vnmrsys/data  
Sample directory: IUridine\_aBOH\_C\_12Sep2009  
File: CARBON

Pulse Sequence: s2pu1

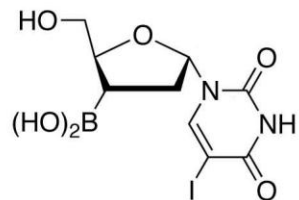

**α-14c**

75-MHz <sup>13</sup>C-NMR  
(CD<sub>3</sub>OD)

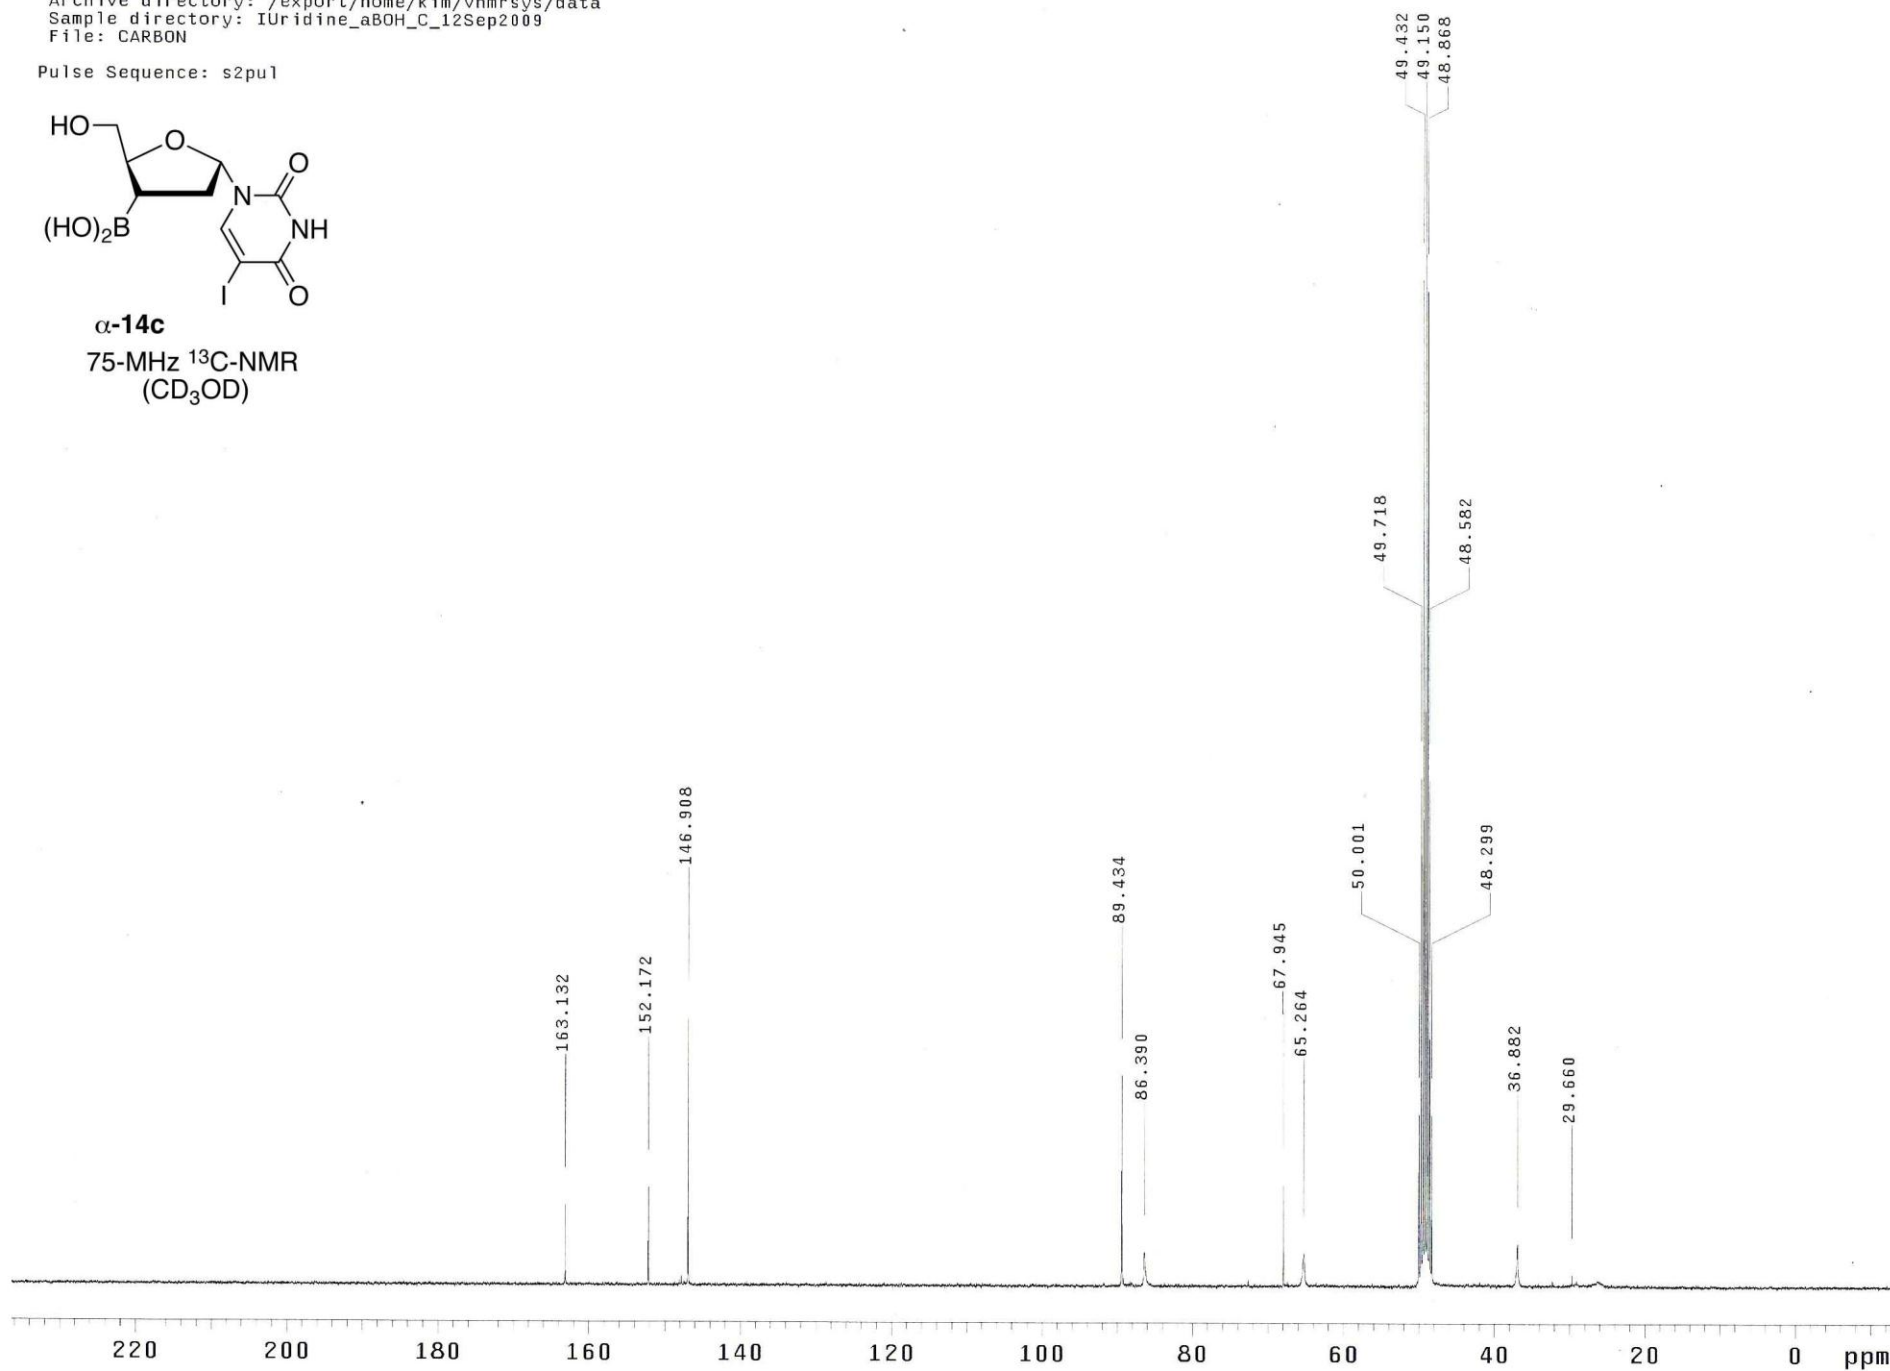

3'-deoxyIodouridine boronic acid  
b anomer

exp5 s2pu1

|             |             |            |          |
|-------------|-------------|------------|----------|
| SAMPLE      |             | SPECIAL    |          |
| date        | Sep 11 2009 | temp       | not used |
| solvent     | CD3OD       | gain       | not used |
| file        | exp         | spin       | not used |
| ACQUISITION |             | hst        | 0.008    |
| sw          | 4803.1      | pw90       | 9.800    |
| at          | 1.998       | alfa       | 20.000   |
| np          | 19192       | FLAGS      |          |
| fb          | not used    | il         | n        |
| bs          | 4           | in         | n        |
| d1          | 1.000       | dp         | y        |
| nt          | 16          | hs         | nn       |
| ct          | 16          | PROCESSING |          |
| TRANSMITTER |             | fn         | not used |
| tn          | H1          | DISPLAY    |          |
| sfrq        | 300.145     | sp         | 466.3    |
| tof         | 1.3         | wp         | 2334.3   |
| tpwr        | 57          | rfl        | 1892.1   |
| pw          | 4.900       | rfp        | 993.5    |
| DECOUPLER   |             | rp         | 60.6     |
| dn          | C13         | lp         | -58.7    |
| dof         | 0           | PLOT       |          |
| dm          | nnn         | wc         | 250      |
| dmm         | c           | sc         | 0        |
| dpwr        | 39          | vs         | 1567     |
| dmf         | 13100       | th         | 6        |
|             | ai          | cdc        | ph       |

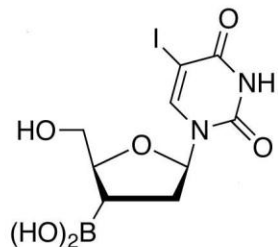

**β-14c**  
300-MHz <sup>1</sup>H-NMR  
(CD<sub>3</sub>OD)

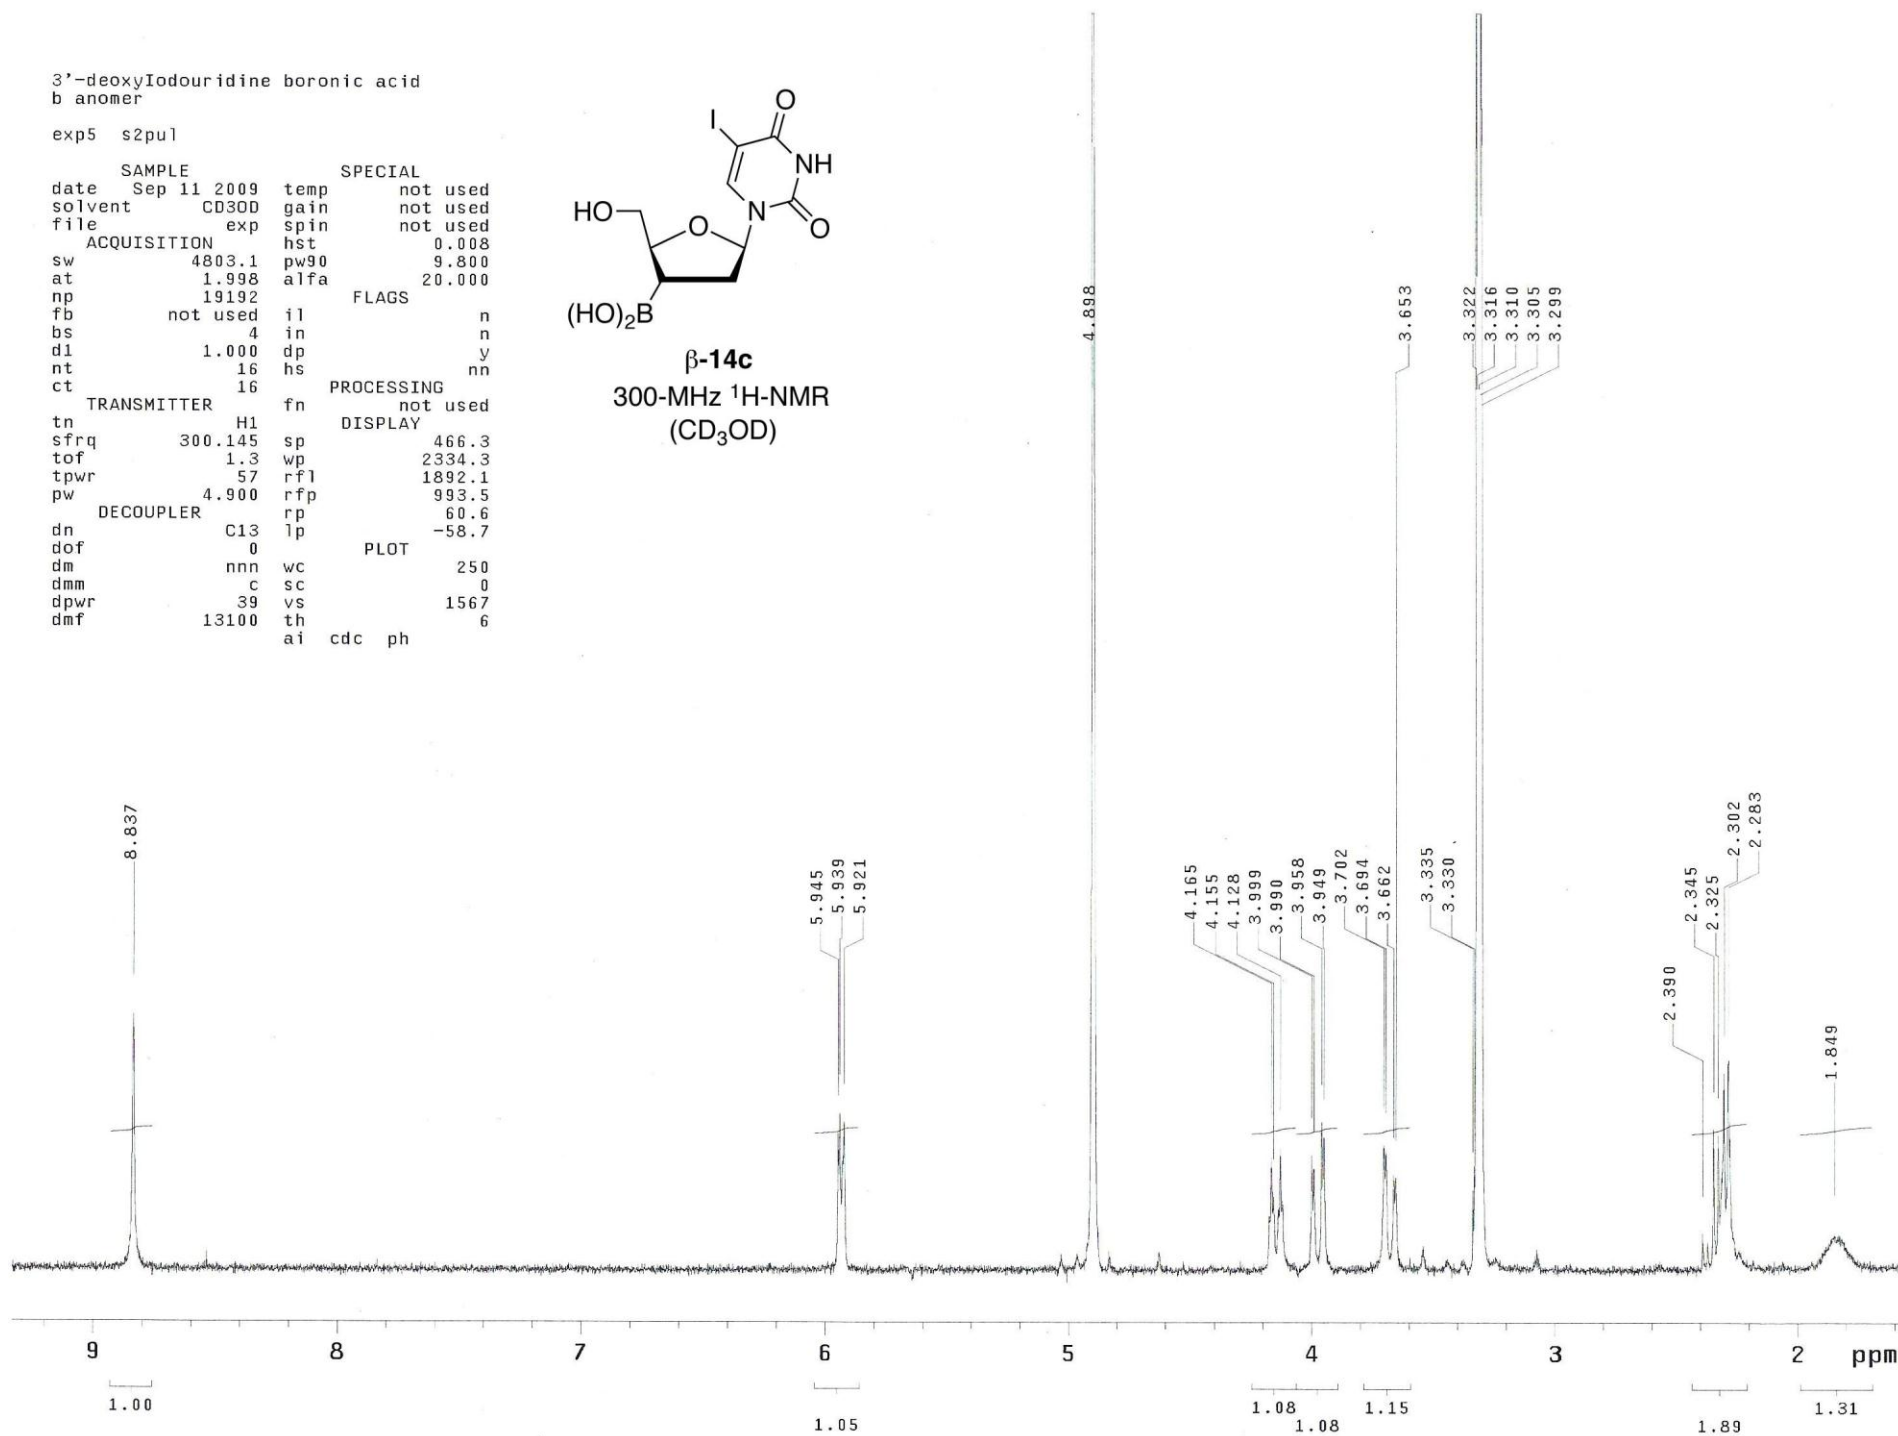

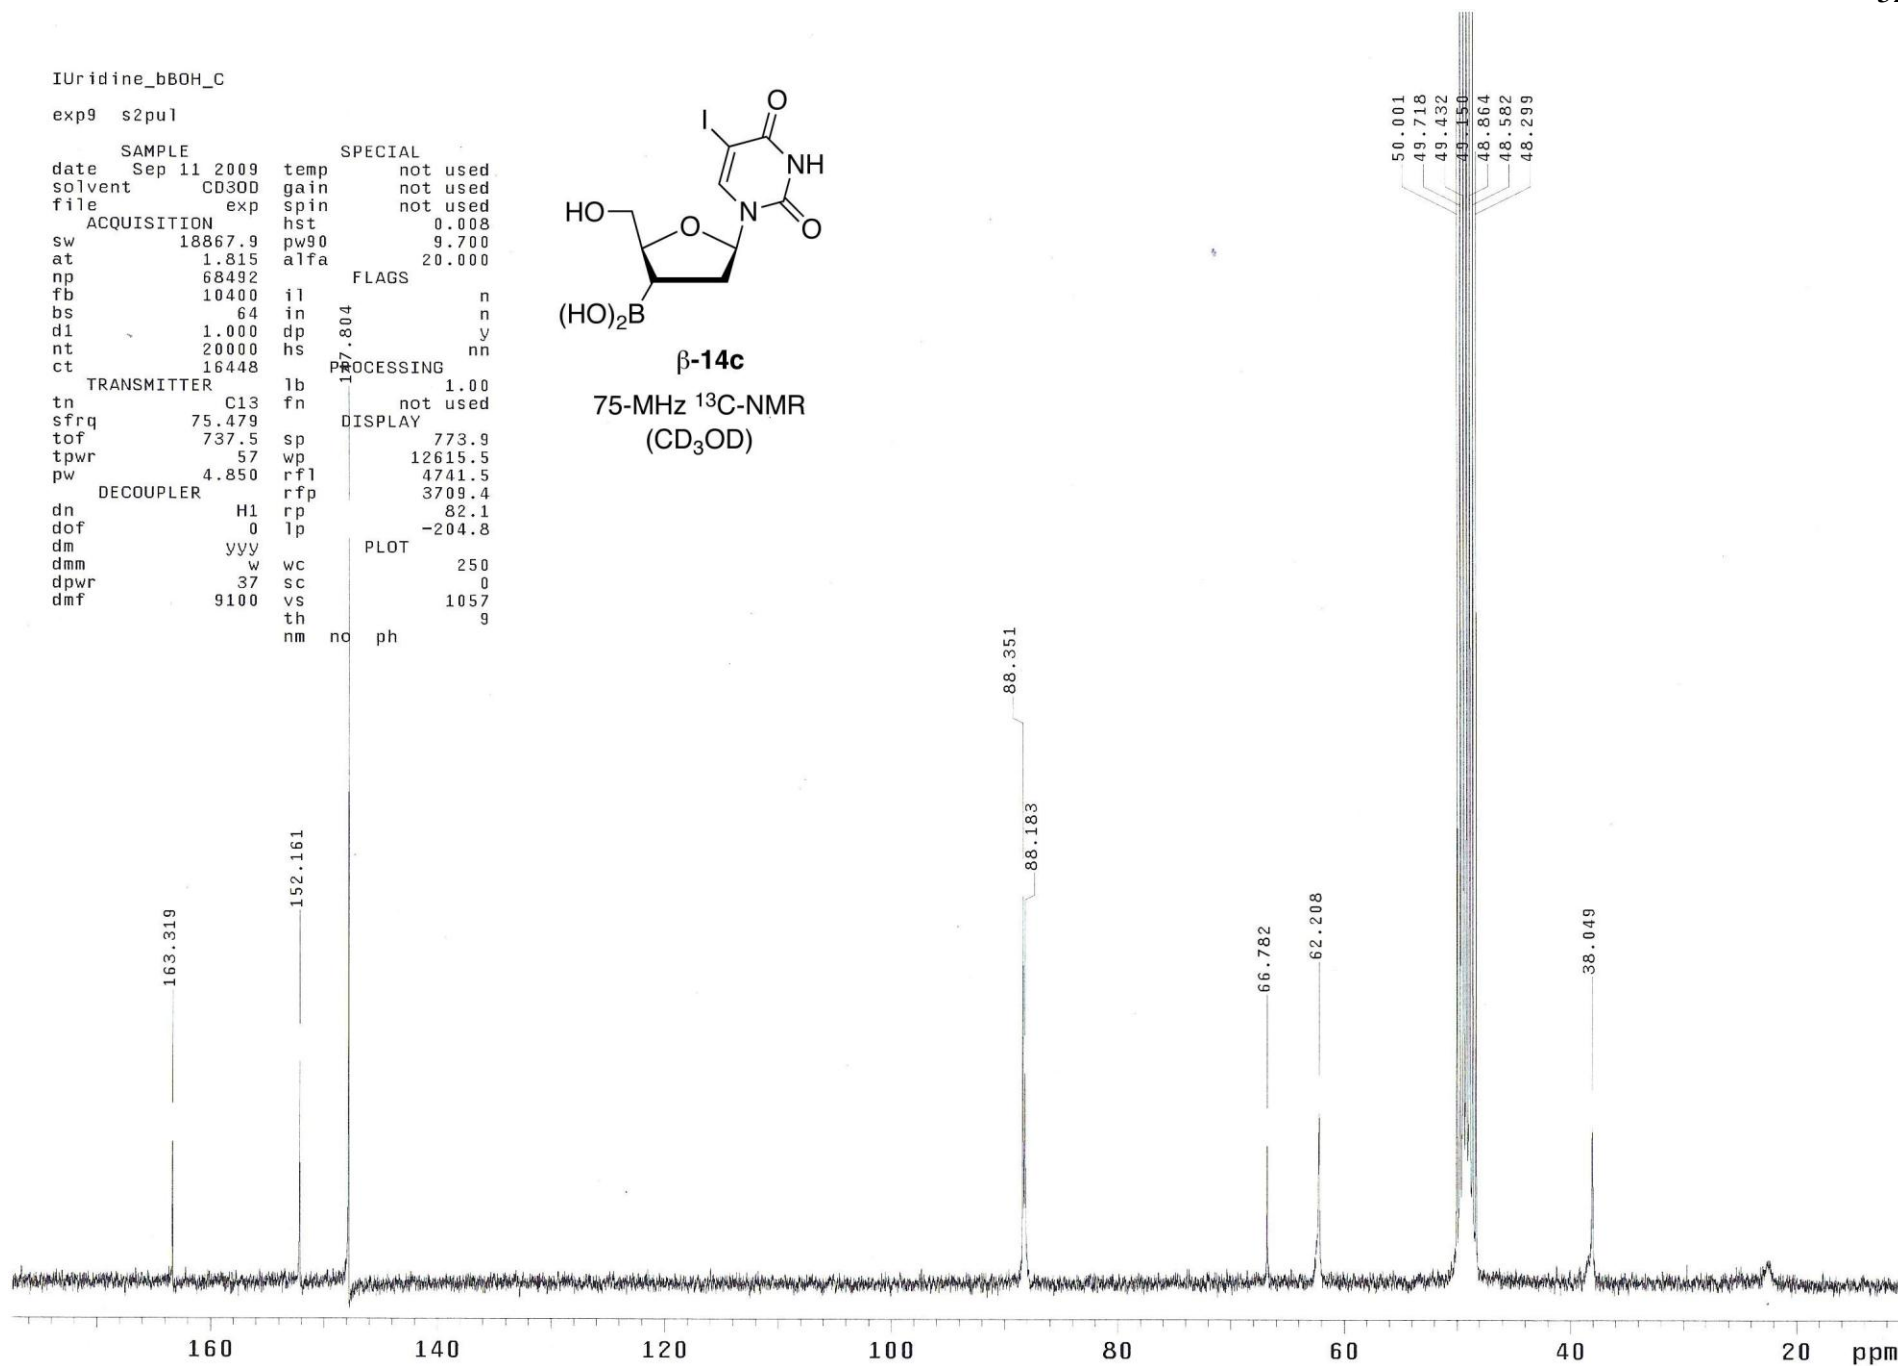

After PLC, Cytidine boronic ester  
fraction 4  
CD3OD:D2O=2:1

Archive directory: /export/home/kim/vnmrsys/data  
Sample directory:  
File: PROTON

Pulse Sequence: s2pu1

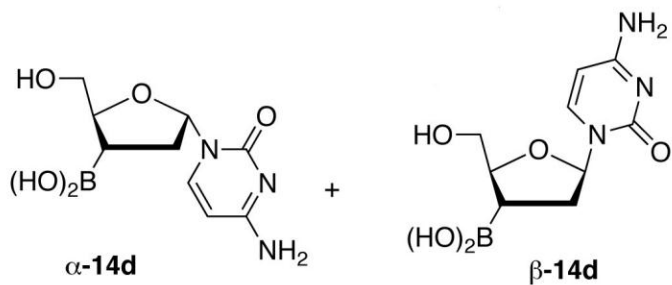

300-MHz  $^1\text{H}$ -NMR ( $\text{CD}_3\text{OD}:\text{D}_2\text{O}$  2:1)

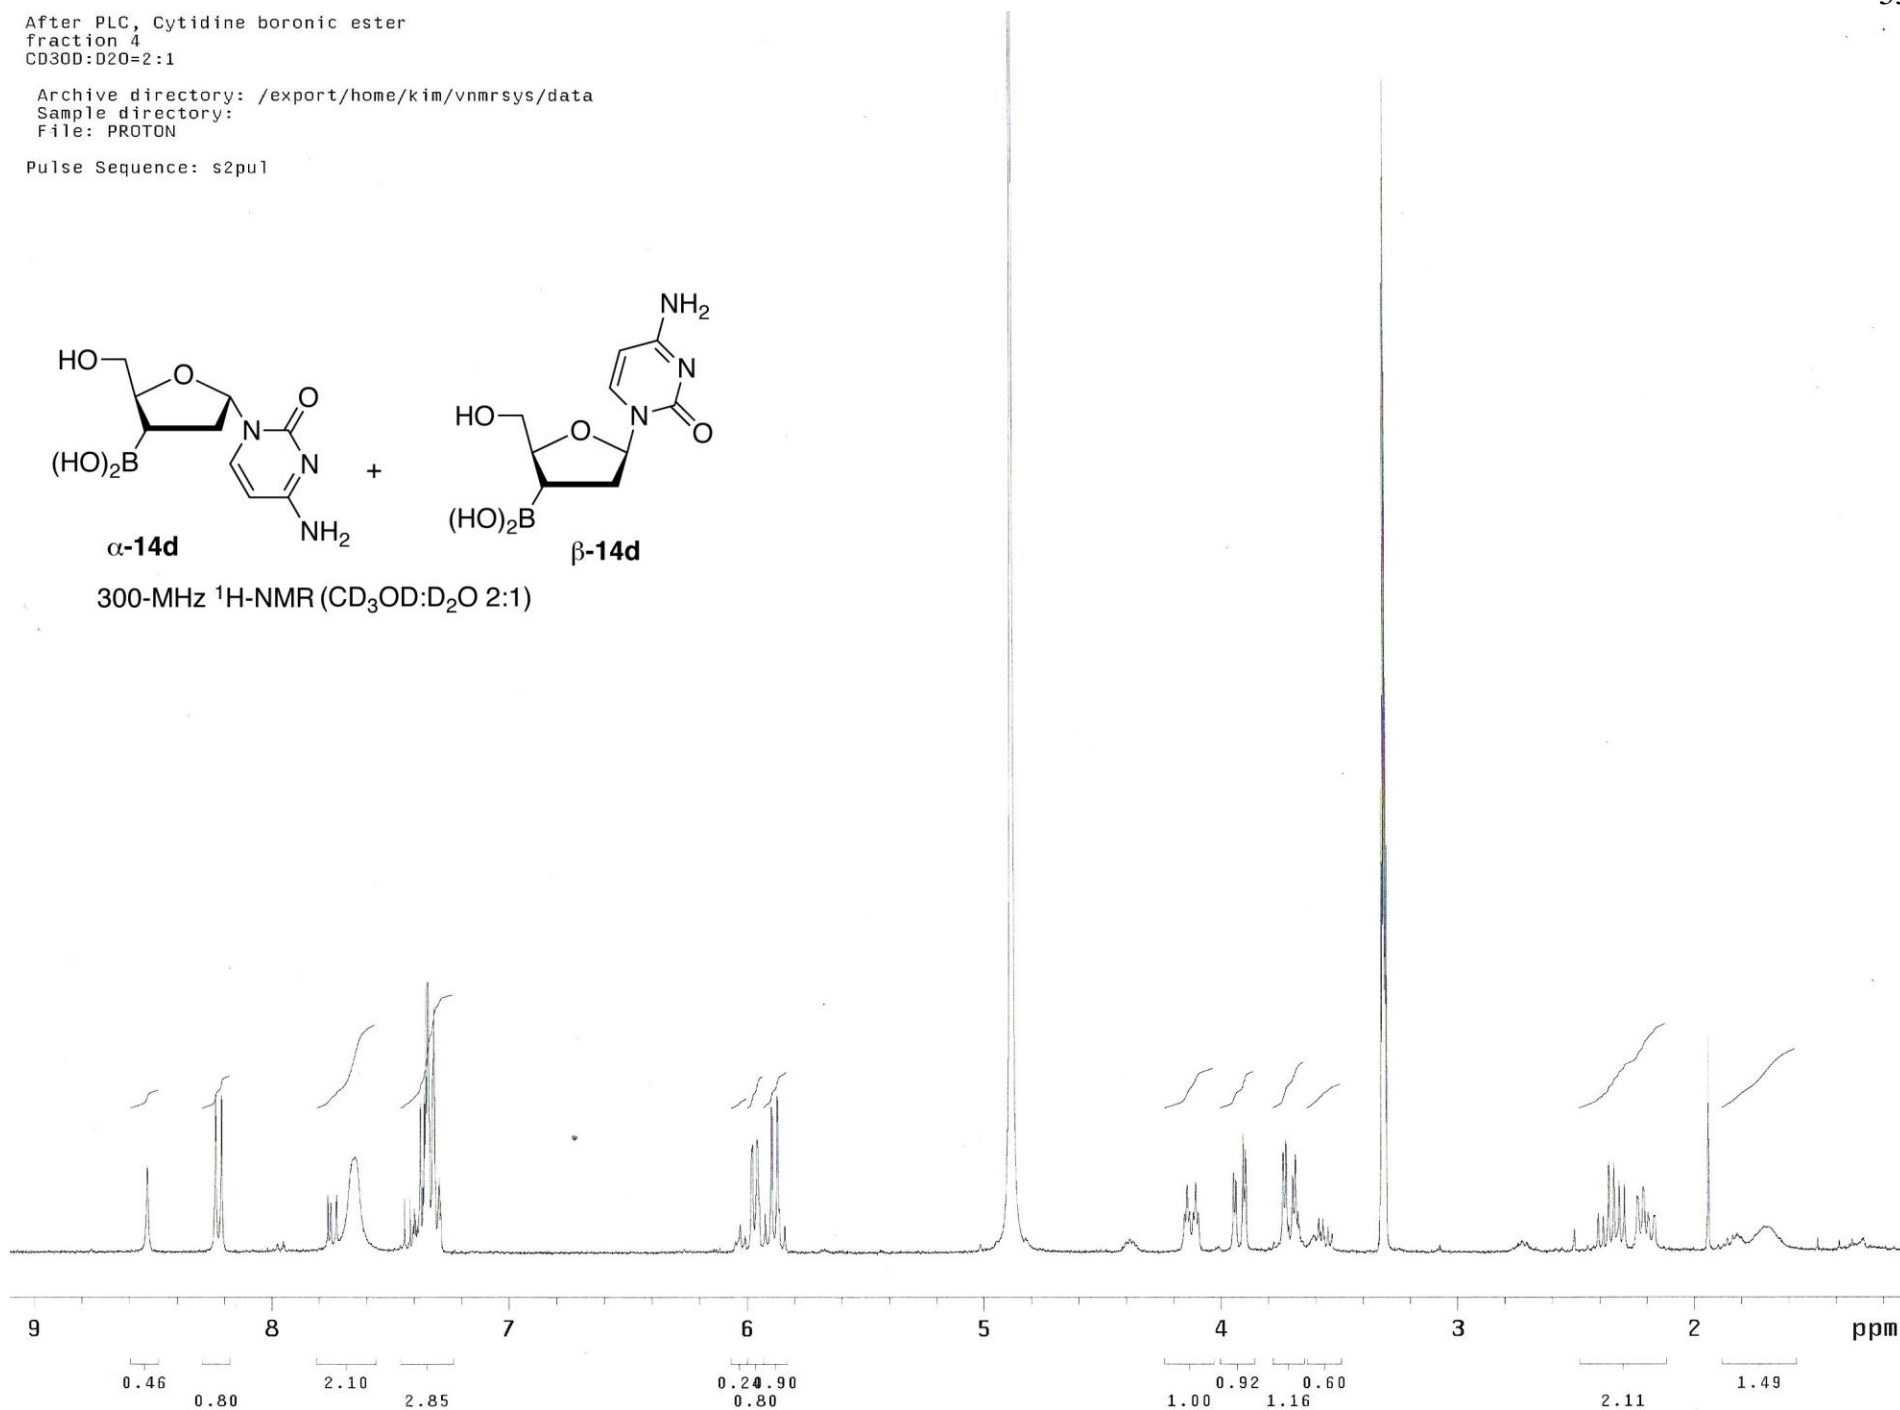

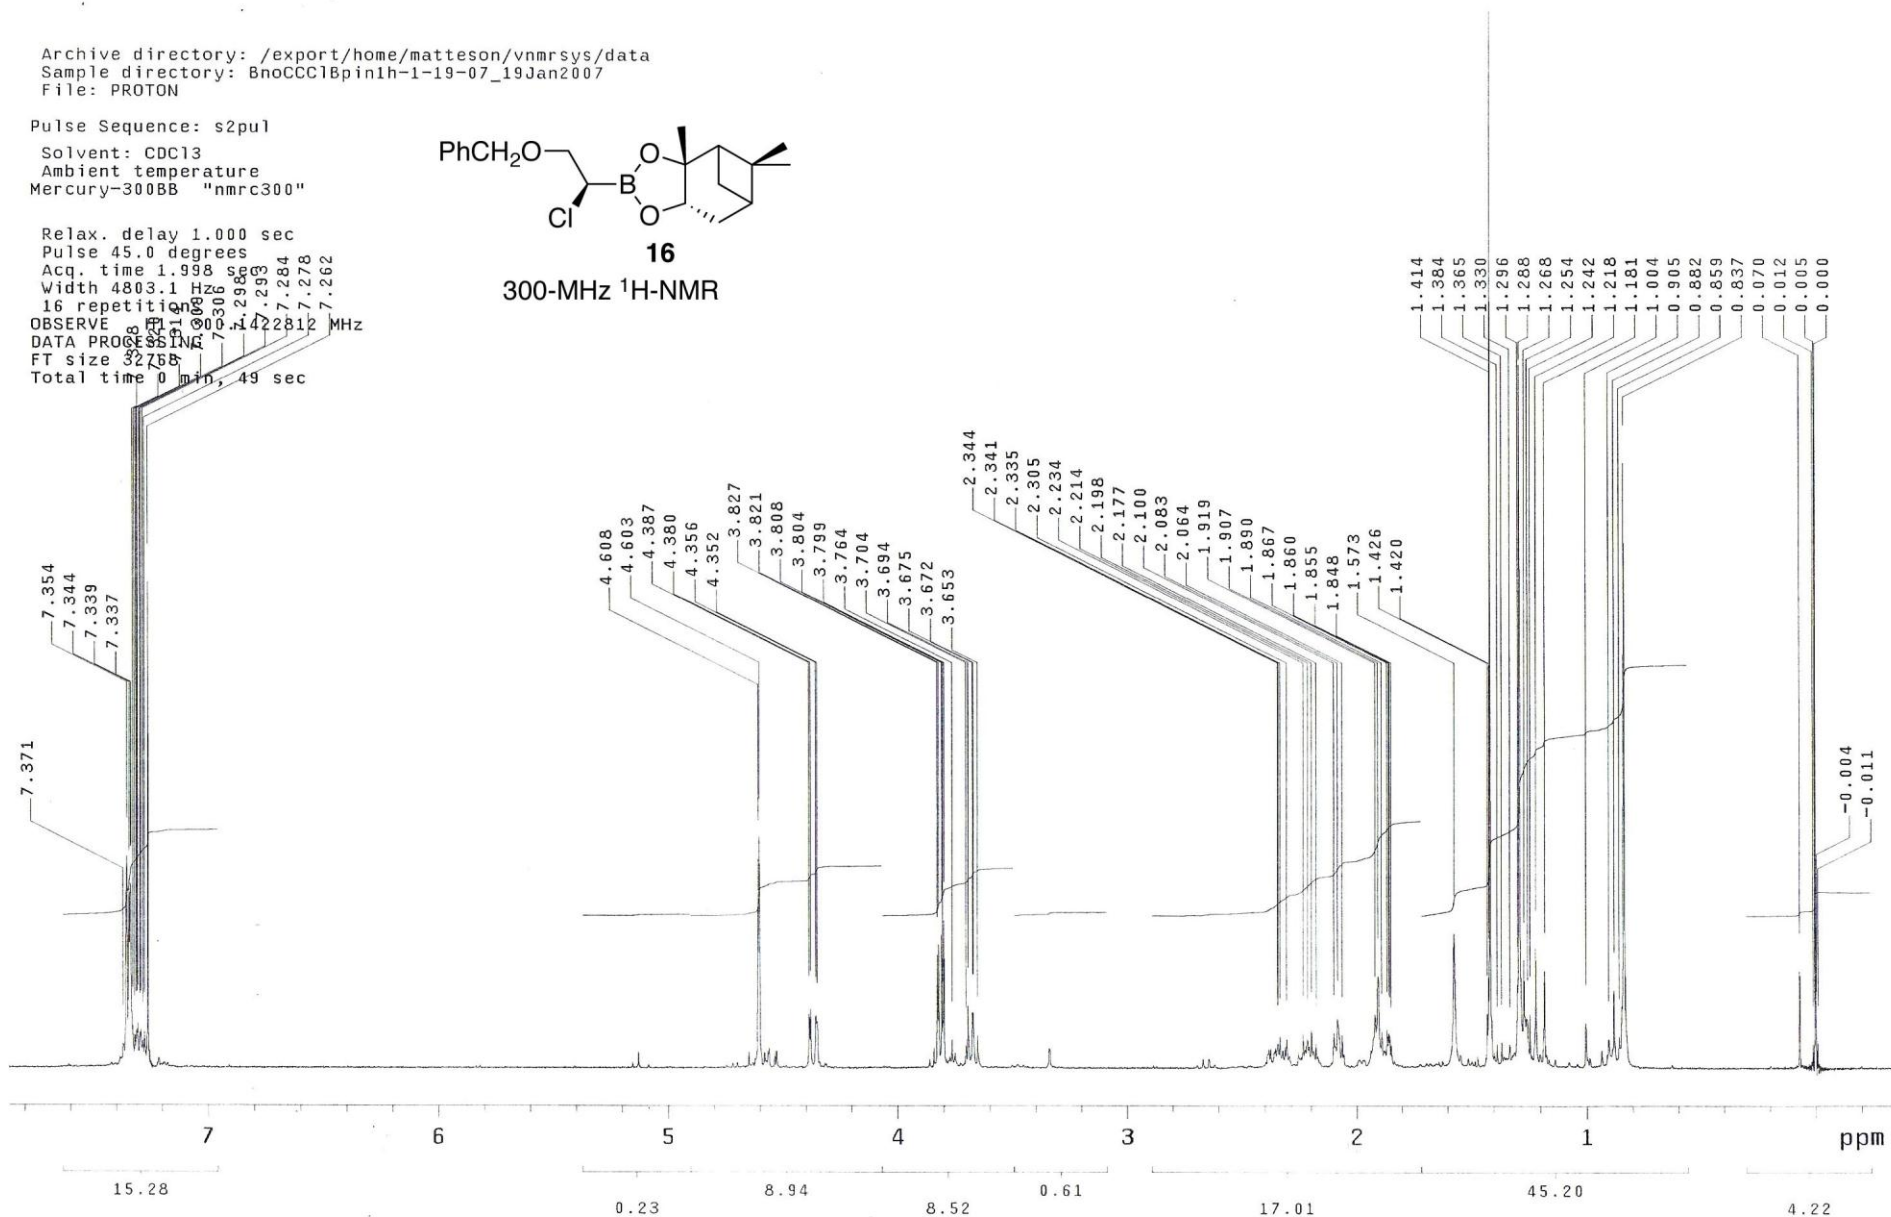

Archive directory: /export/home/matteson/vnmrsys/data  
Sample directory: BnOCH2CHOBnBpin1H\_26Jan2007  
File: PROTON

Pulse Sequence: s2pu1

Solvent: CDCl3  
Ambient temperature  
Mercury-300BB "nmrc300"

Relax. delay 1.000 sec  
Pulse 45.0 degrees  
Acq. time 1.998 sec  
Width 4803.1 Hz  
4 repetitions  
OBSERVE H1, 300.1422818 MHz  
DATA PROCESSING  
FT size 32768  
Total time 0 min, 13 sec

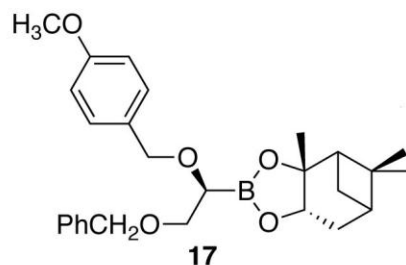

300-MHz <sup>1</sup>H-NMR

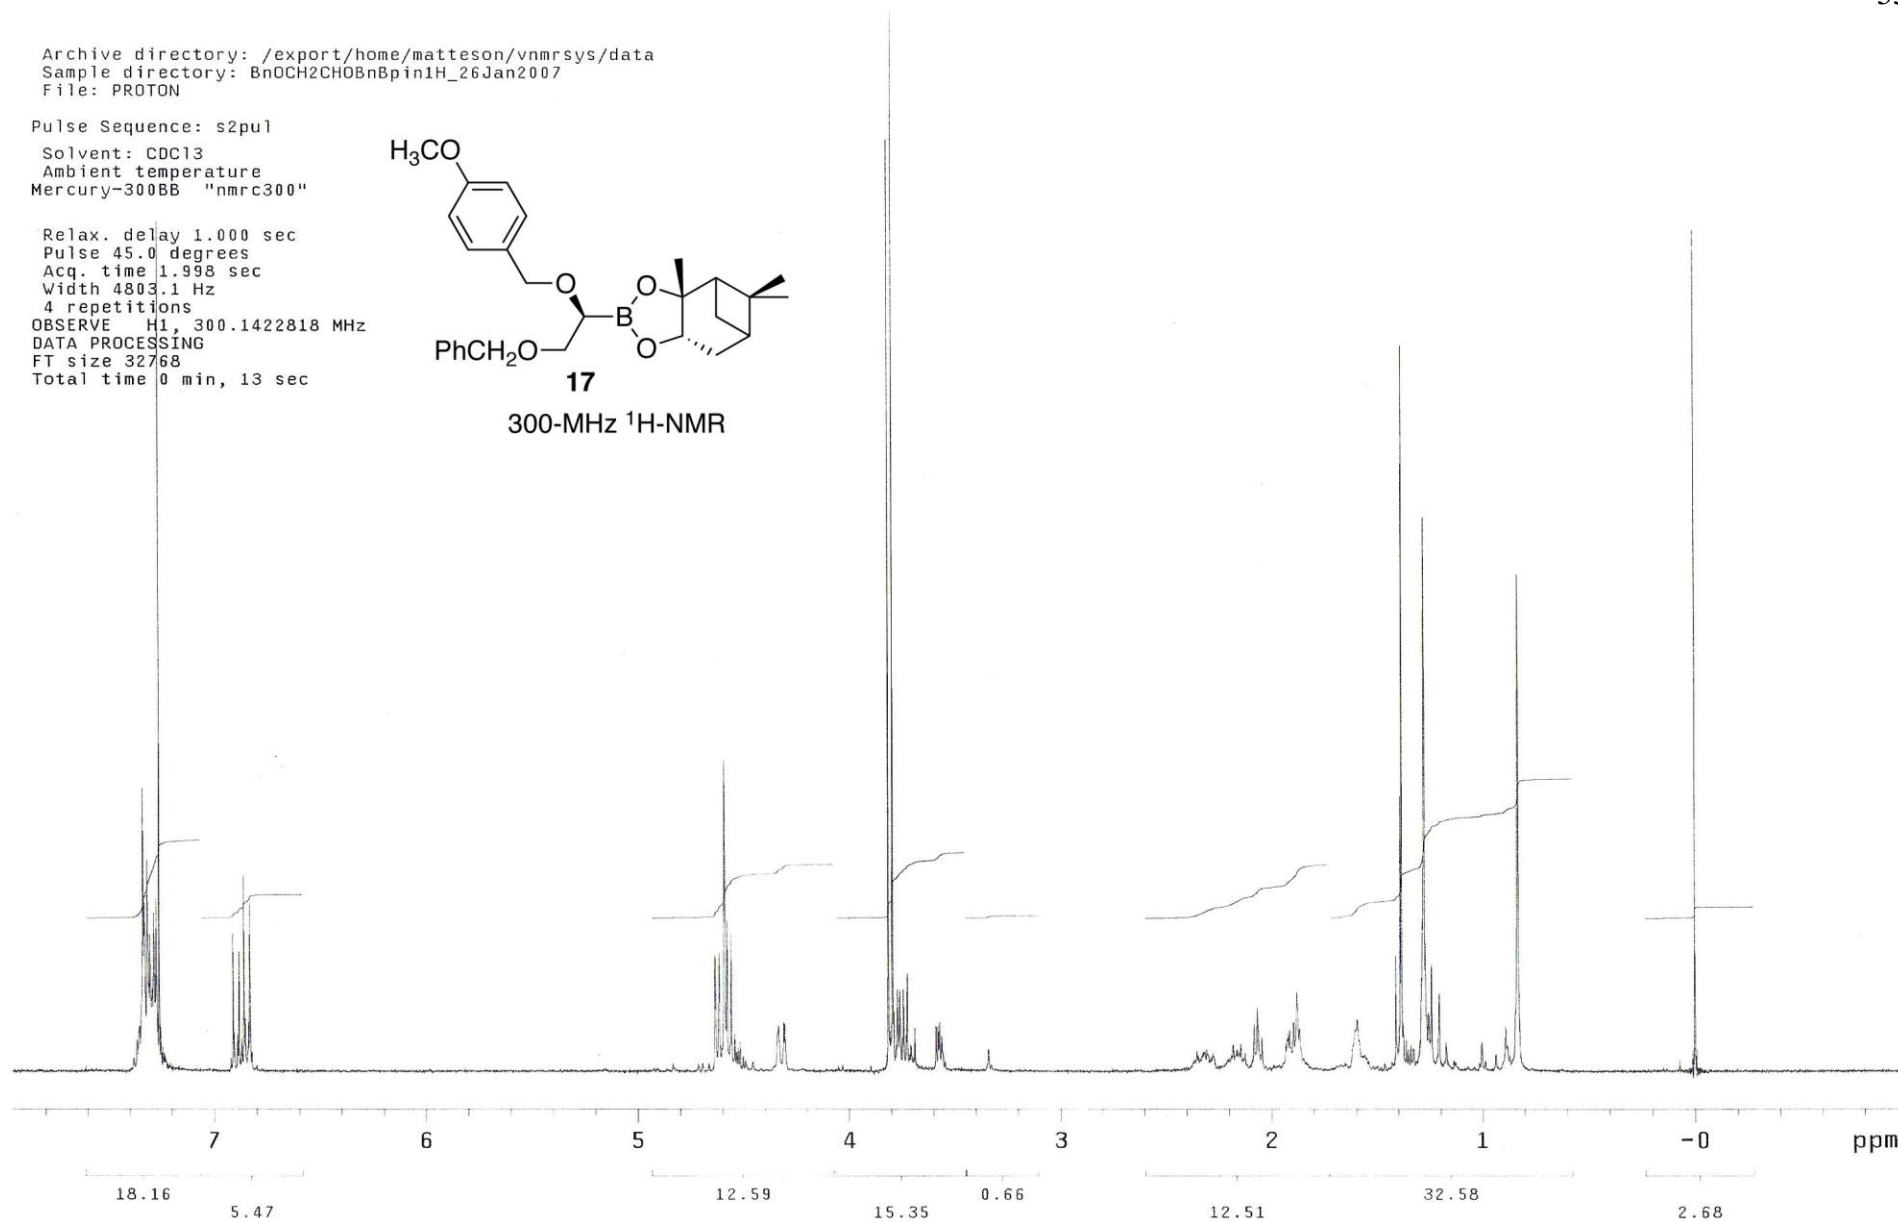

Archive directory: /export/home/matteson/vnmrsys/data  
Sample directory: BnOCCOPMBBF3Cs-1H\_27Feb2007-14:43:09  
File: PROTON

Pulse Sequence: s2pu1

Solvent: CD3OD  
Ambient temperature  
Mercury-300BB "nmrc300"

Relax. delay 1.000 sec  
Pulse 45.0 degrees  
Acq. time 1.998 sec  
Width 4803.1 Hz  
4 repetitions  
OBSERVE H1, 300.1434648 MHz  
DATA PROCESSING  
FT size 32768  
Total time 0 min, 13 sec

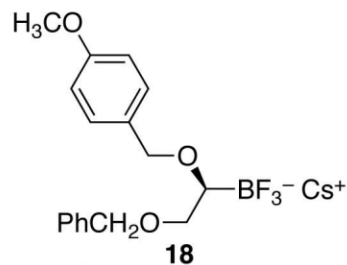

300-MHz <sup>1</sup>H-NMR  
(CD<sub>3</sub>OD)

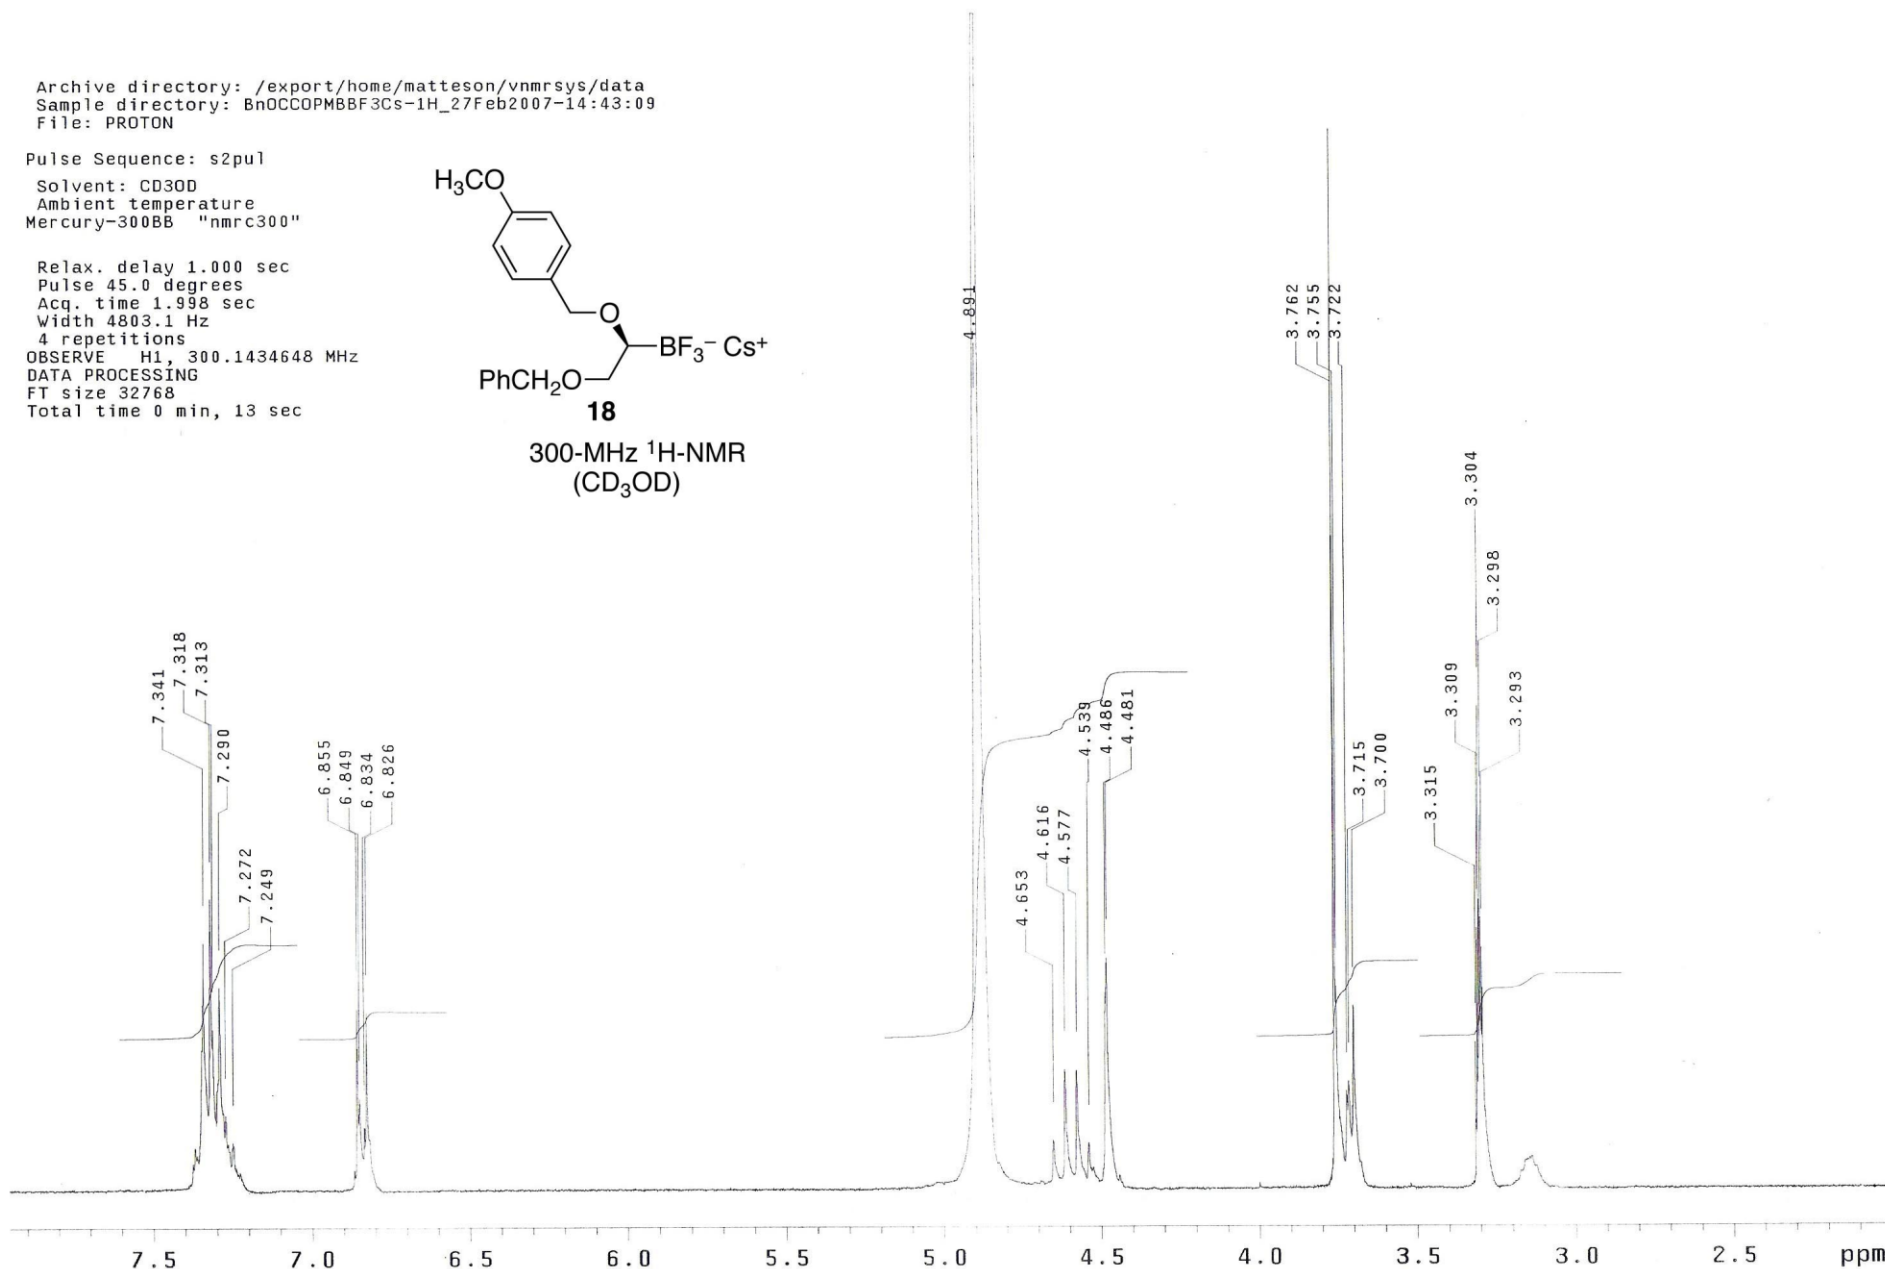

Archive directory: /export/home/matteson/vnmrsys/data  
Sample directory: DSM3-21-07CD30D13C\_21Mar2007  
File: CARBON

Pulse Sequence: s2pul  
Solvent: CD3OD  
Ambient temperature  
Mercury-300BB "nmrc300"

Relax. delay 1.000 sec  
Pulse 45.0 degrees  
Acq. time 1.812 sec  
Width 17006.8 Hz  
256 repetitions  
OBSERVE C13, 75.4711162 MHz  
DECOUPLE H1, 300.1449643 MHz  
Power 37 dB  
continuously on  
WALTZ-16 modulated  
DATA PROCESSING  
Line broadening 1.0 Hz  
FT size 65536  
Total time 13 min, 9 sec

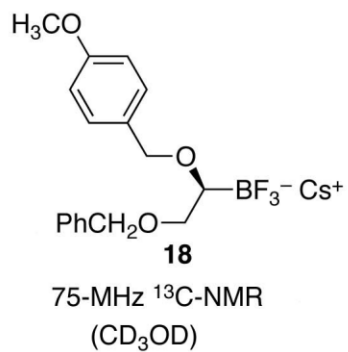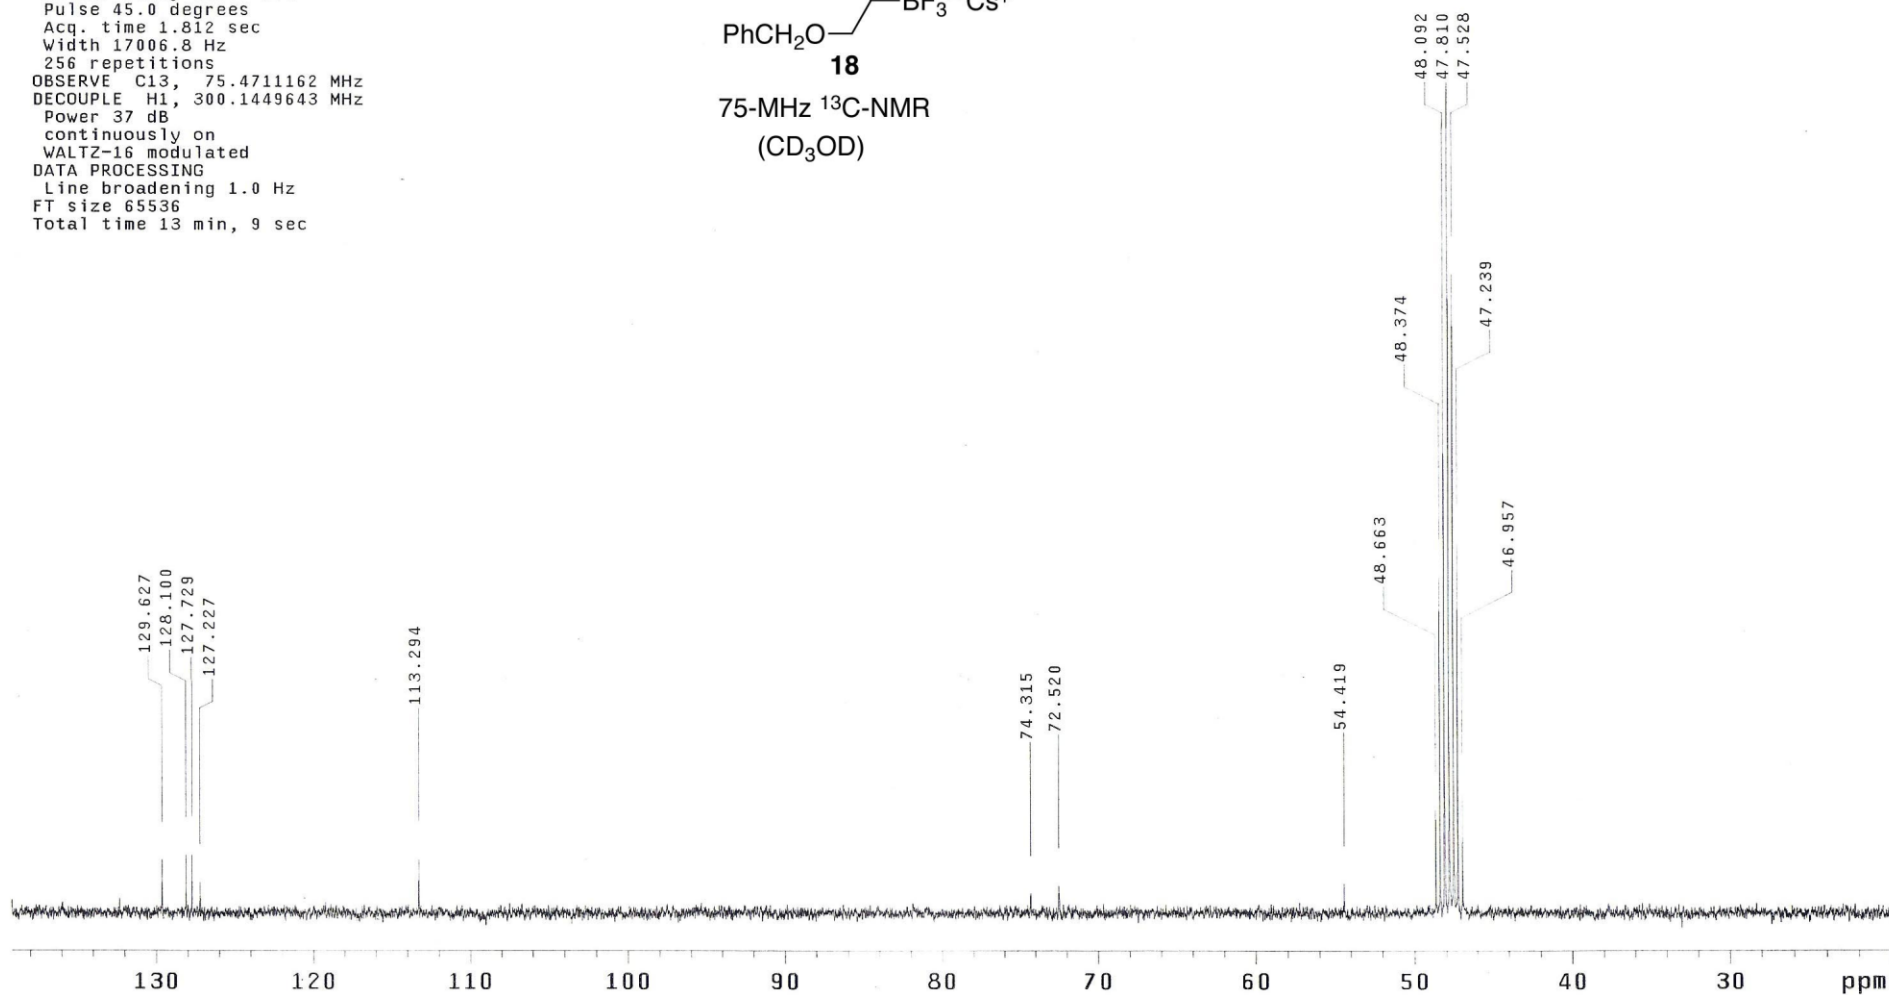

Archive directory: /export/home/matteson/vnmrsys/data  
Sample directory: DSM3-21-07CD30D19F\_21Mar2007  
File: FLUORINE

Pulse Sequence: s2pu1  
Solvent: CD3OD  
Ambient temperature  
Mercury-300BB "nmrc300"

Relax. delay 1.500 sec  
Pulse 30.0 degrees  
Acq. time 0.300 sec  
Width 64935.1 Hz  
16 repetitions  
OBSERVE F19, 282.4171351 MHz  
DATA PROCESSING  
Line broadening 1.5 Hz  
FT size 65536  
Total time 0 min, 31 sec

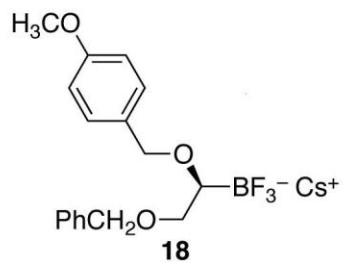

282-MHz  $^{19}\text{F}$ -NMR  
( $\text{CD}_3\text{OD}$ )

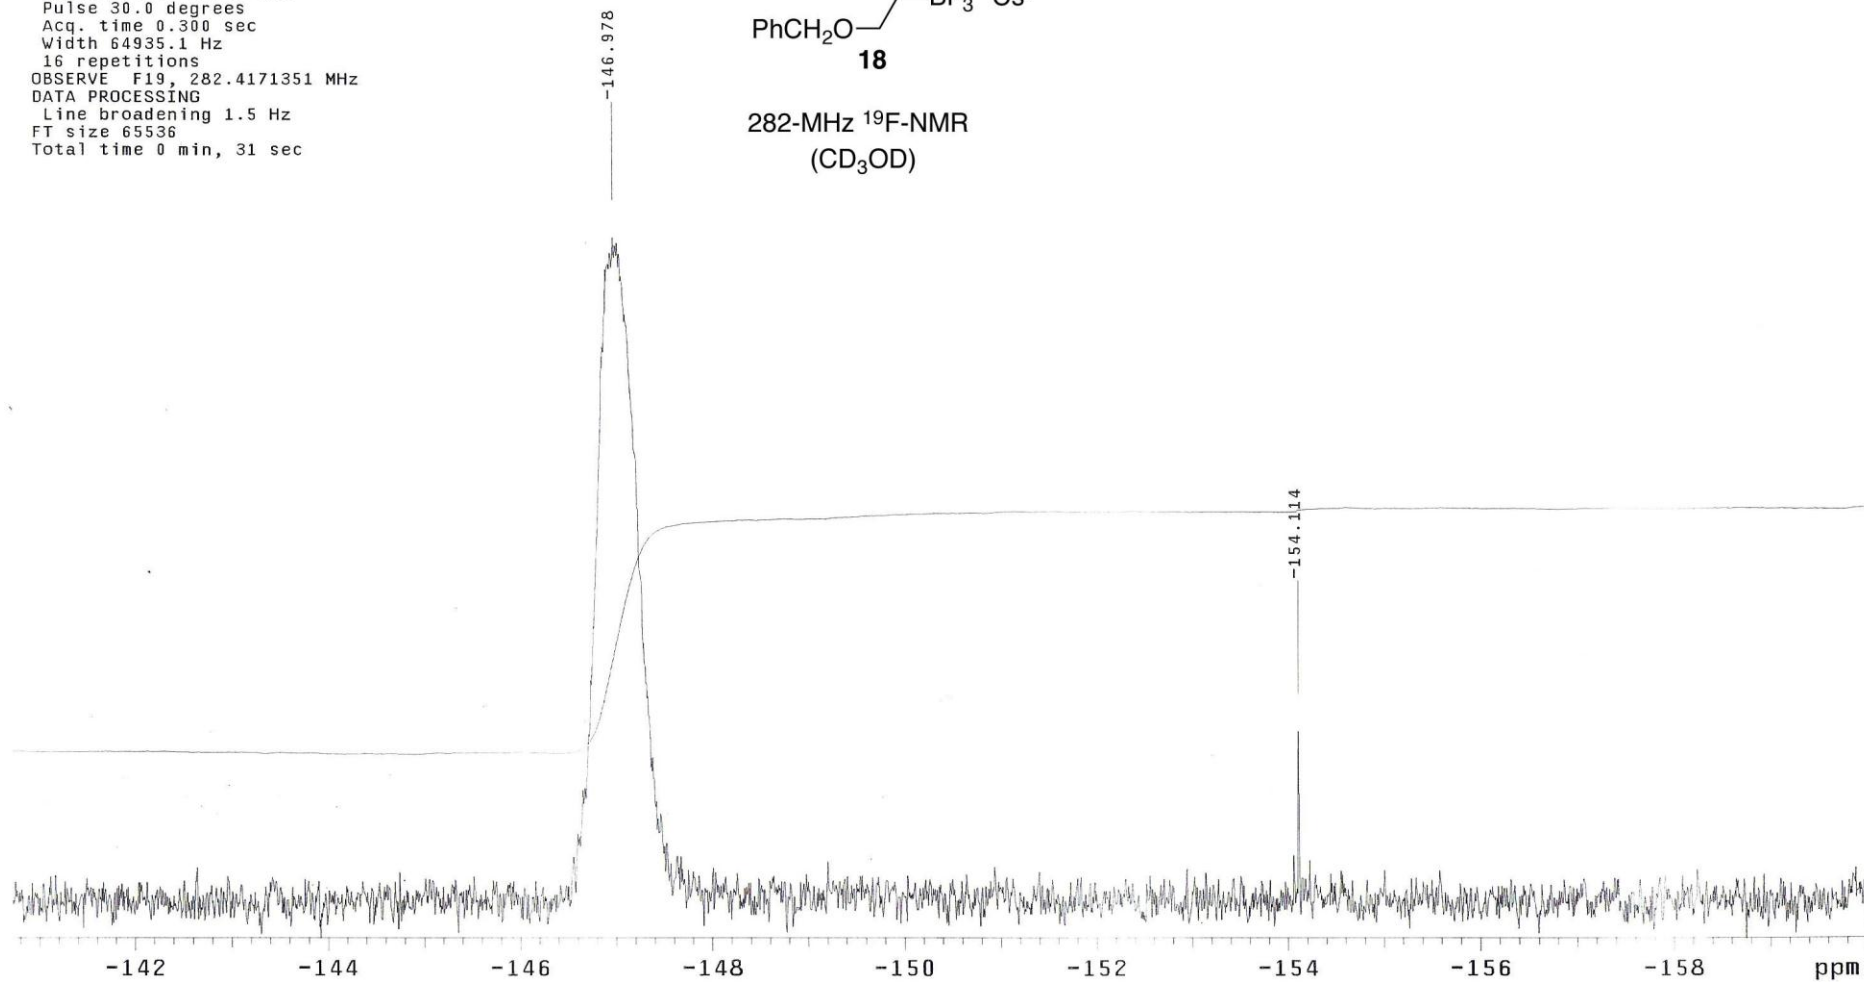

STANDARD 1H OBSERVE

Archive directory: /export/home/matteson/vnmrsys/data  
Sample directory: BnOCC(OPMB)B+PD1H\_03Apr2007  
File: PROTON

Pulse Sequence: s2pu1

Solvent: CDCl3  
Ambient temperature  
Mercury-300BB "nmrc300"

Relax. delay 1.000 sec  
Pulse 45.0 degrees  
Acq. time 1.998 sec  
Width 4803.1 Hz  
4 repetitions  
OBSERVE H1, 300.1422879 MHz  
DATA PROCESSING  
FT size 32768  
Total time 0 min, 13 sec

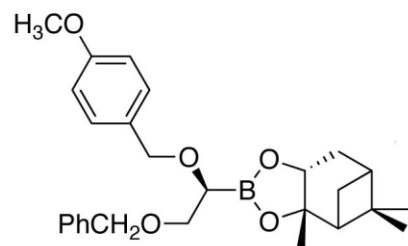

**19**

300-MHz <sup>1</sup>H-NMR

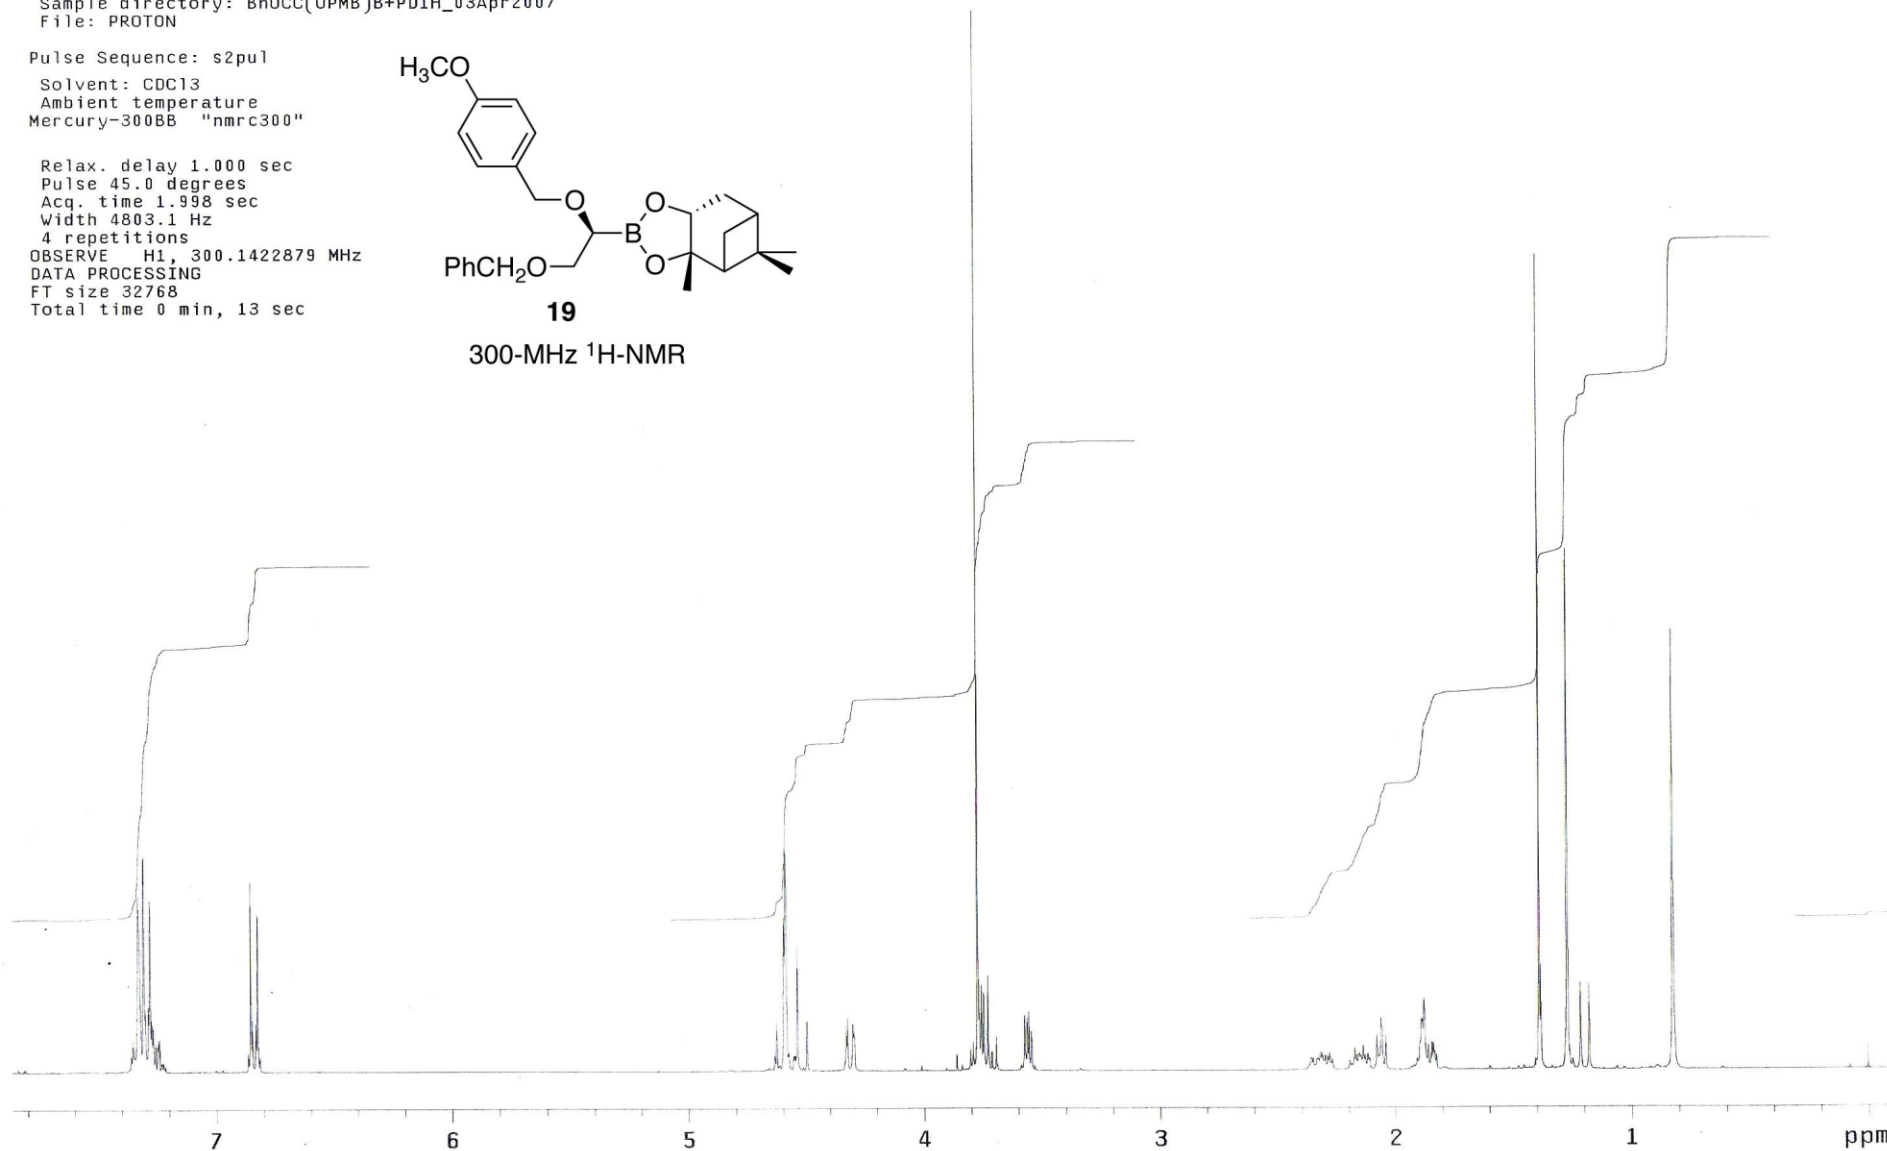

<sup>13</sup>C OBSERVE

Archive directory: /export/home/matteson/vnmrsys/data  
Sample directory: BnOCC(OPMB)B+PD13C\_03Apr2007  
File: CARBON

Pulse Sequence: s2pu1

Solvent: CDCl<sub>3</sub>  
Ambient temperature  
Mercury-300BB "nmrc300"

Relax. delay 1.000 sec  
Pulse 45.0 degrees  
Acq. time 1.812 sec  
Width 17006.8 Hz  
512 repetitions  
OBSERVE C13, 75.4708189 MHz  
DECOUPLE H1, 300.1437817 MHz  
Power 37 dB  
continuously on  
WALTZ-16 modulated  
DATA PROCESSING  
Line broadening 1.0 Hz  
FT size 65536  
Total time 26 min, 19 sec

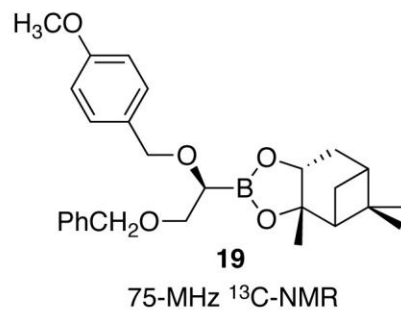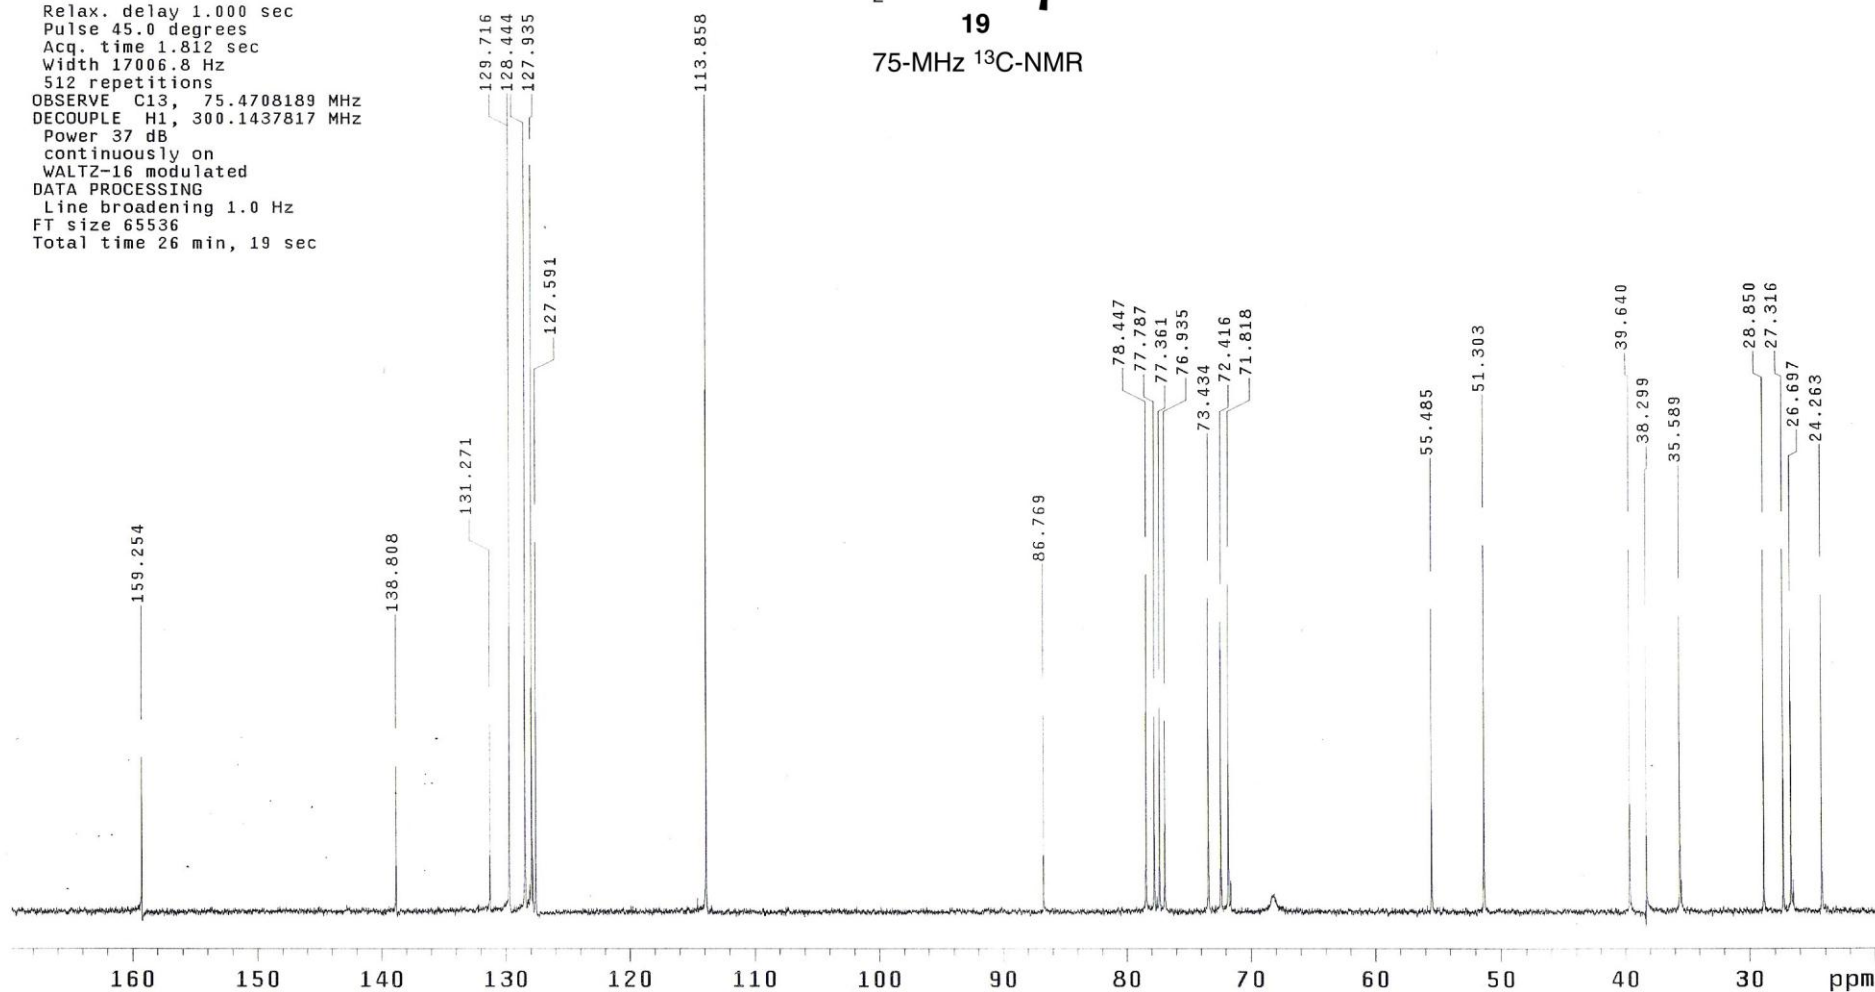

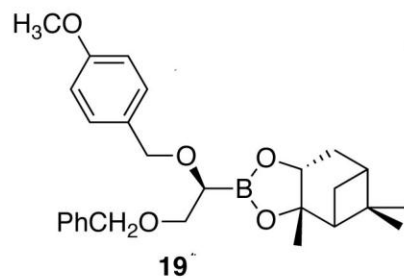

DEPT NMR

CH3 carbons

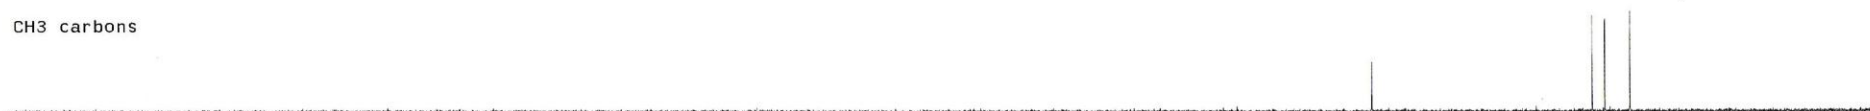

CH2 carbons

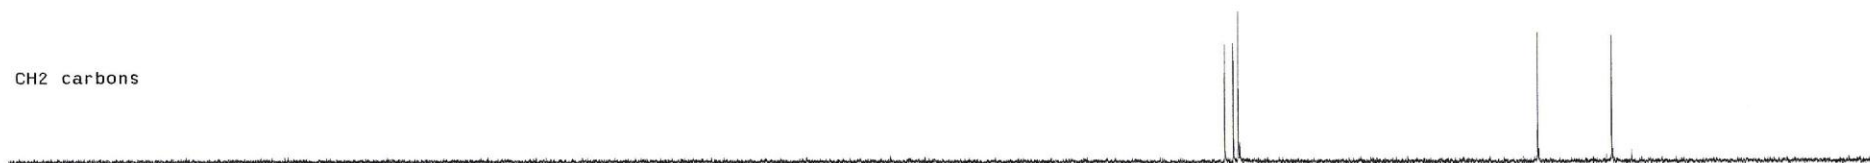

CH carbons

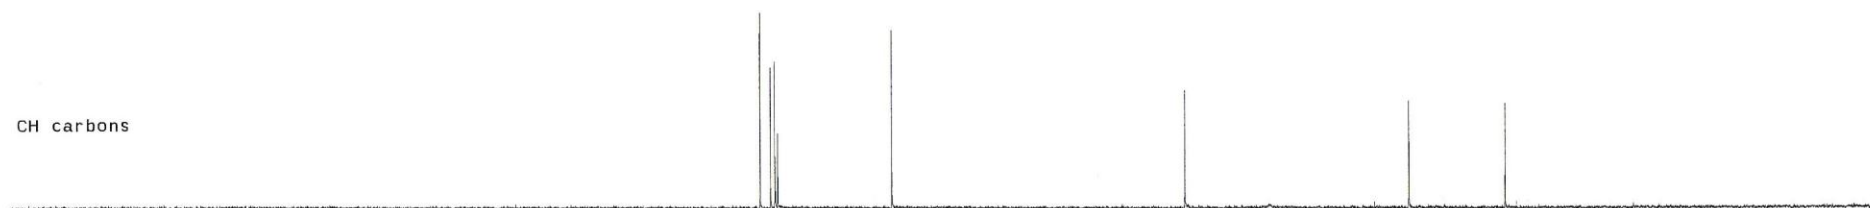

all protonated carbons

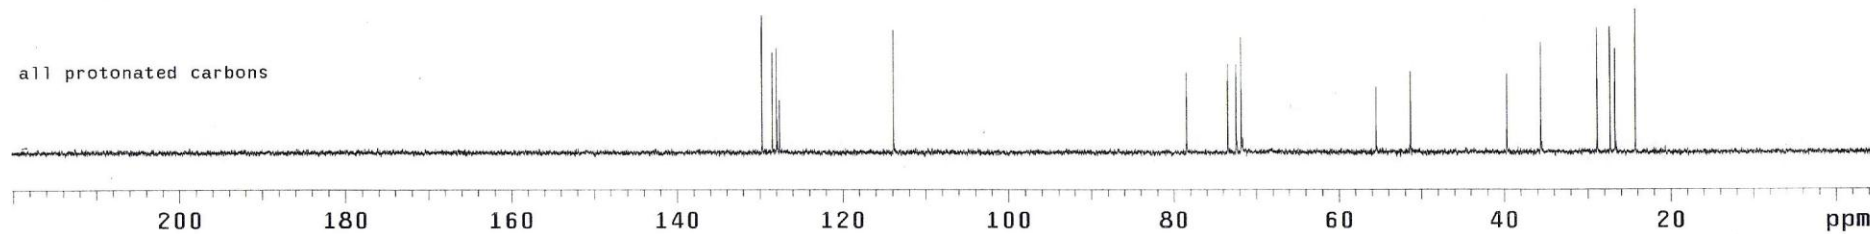

$\beta$  -BFUdR stability at 37 °C

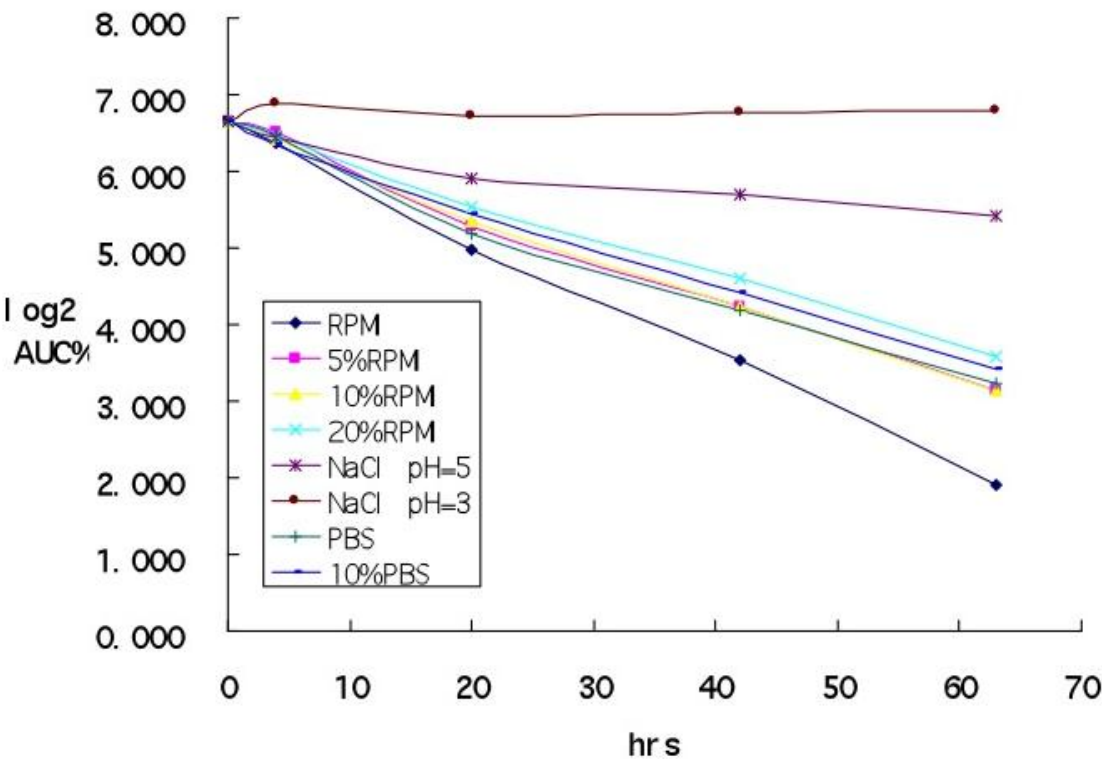

AUC = area under curve, integrated HPLC signal. RPM is RPMI-1640, 10%RPM is 10% bovine fetal serum/90% RPMI-1640, PBS is phosphate, BFUdR is  $\beta$ -14b.

Half life of  $\beta$ -BFUdR in different conditions at 37 °C

| condition            | T1/2 (hrs) |
|----------------------|------------|
| RPMI pH=7.4          | 13.4       |
| 5 % FBS-RPMI pH=7.4  | 17.7       |
| 10 % FBS-RPMI pH=7.4 | 18.0       |
| 20 % FBS-RPMI pH=7.4 | 20.6       |
| 150 mM Nacl pH=5     | 54.1       |
| 150 mM Nacl pH=3     | stable     |
| PBS pH=7.4           | 18.3       |
| 10 % FBS-PBS pH=7.4  | 19.8       |

|                 |                         |
|-----------------|-------------------------|
| RPMI            | $y = -0.0747x + 6.612$  |
|                 | $R^2 = 0.9983$          |
| 5%FBS-RPMI      | $y = -0.0564x + 6.6142$ |
|                 | $R^2 = 0.9933$          |
| 10%FBS-RPMI     | $y = -0.0556x + 6.5915$ |
|                 | $R^2 = 0.9973$          |
| 20%FBS-RPMI     | $y = -0.0485x + 6.6214$ |
|                 | $R^2 = 0.9976$          |
| 150mM Nacl pH=5 | $y = -0.0185x + 6.4973$ |
|                 | $R^2 = 0.9268$          |
| 150Mm Nacl pH=3 | stable                  |
|                 |                         |
| PBS             | $y = -0.0545x + 6.5508$ |
|                 | $R^2 = 0.9861$          |
| 10%FBS-PBS      | $y = -0.0506x + 6.5558$ |
|                 | $R^2 = 0.997$           |

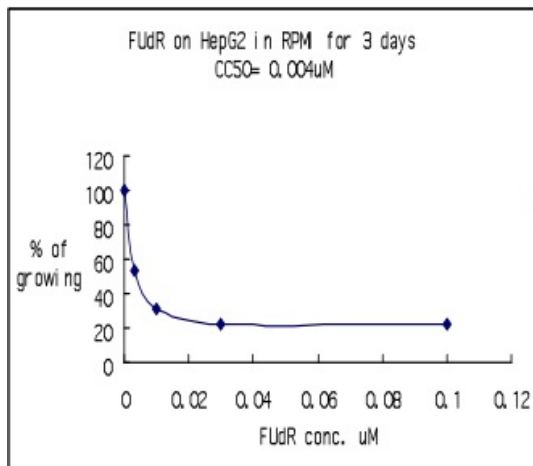

19 fold

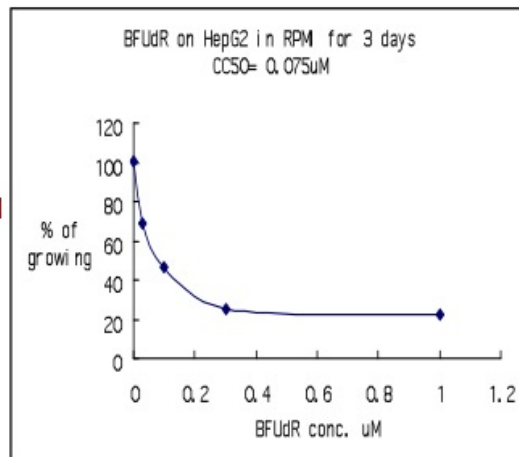

| $\beta$ -BFDuR in 10% RPMI |      |       |                 |
|----------------------------|------|-------|-----------------|
| hrs                        | FU%  | FUdR% | $\beta$ -BFDuR% |
| 0                          | 4.6  | 3.0   | 92.4            |
| 4                          | 10.9 | 5.5   | 83.6            |
| 20                         | 45.3 | 6.9   | 47.8            |
| 42                         | 69.3 | 7.6   | 23.0            |
| 63                         | 81.7 | 7.7   | 10.5            |

In 63 hrs, about 5%  $\beta$ -BFDuR was converted into FUdR, which might explain the phenomenon that the cytotoxicity of  $\beta$ -BFDuR is about 5% of FUdR.

BFDuR is  $\beta$ -14b, FU is 5-fluorouracil, FUdR is 5-fluoro-2'-deoxyuridine.

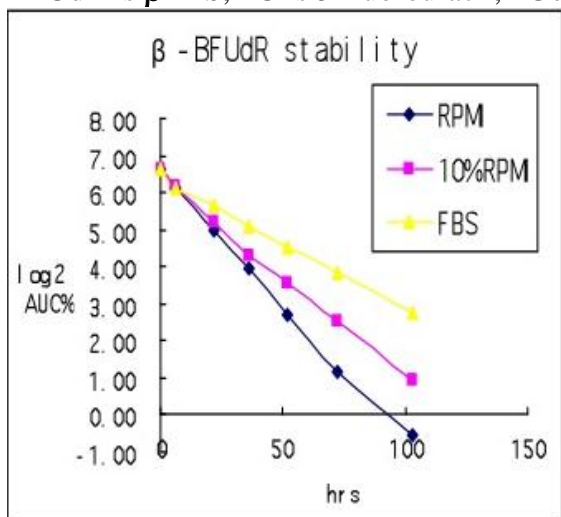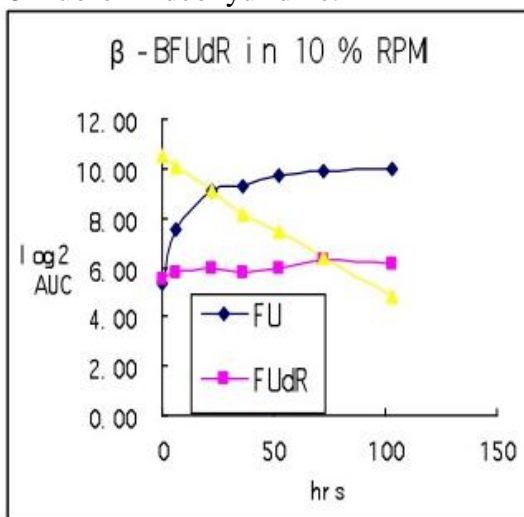

| $\beta$ -BFDuR | RPMI | 10 % RPMI | FBS  |
|----------------|------|-----------|------|
| T1/2 (hrs)     | 14.1 | 18.3      | 27.3 |

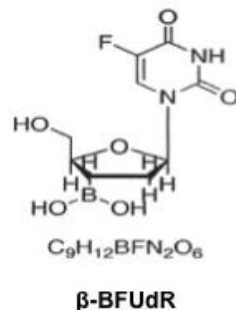

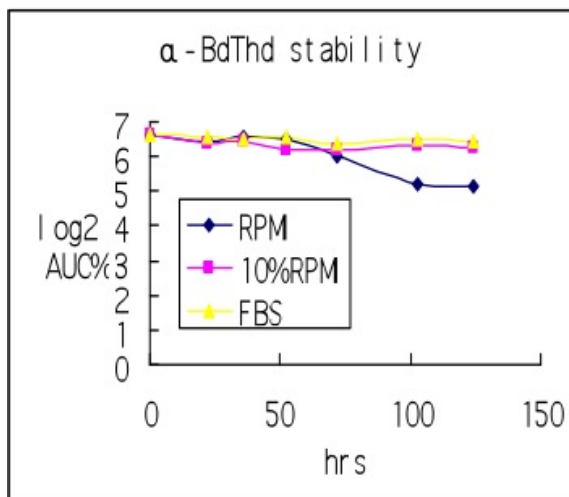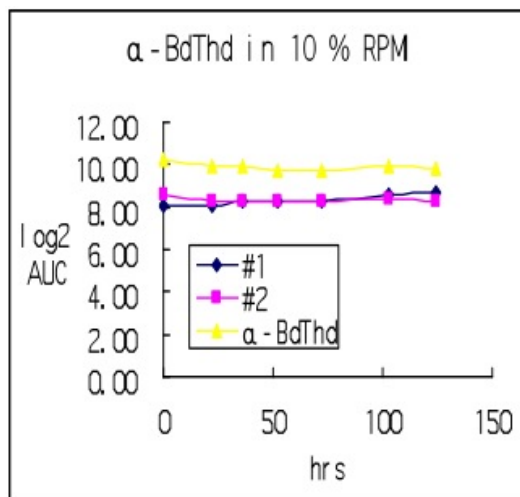

| $\alpha$ -BdThd | RPMI | 10 % RPMI | FBS   |
|-----------------|------|-----------|-------|
| T1/2 (hrs)      | 72.5 | 454.5     | 769.2 |

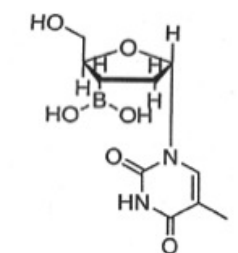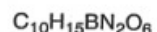

$\alpha$ -BdThd

BdThd is **14a**, Thd is thymidine.

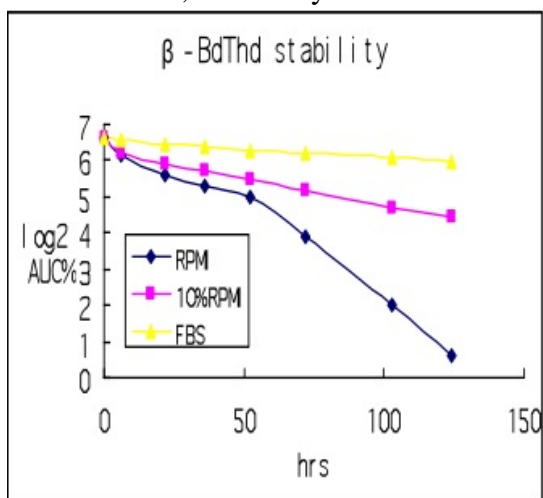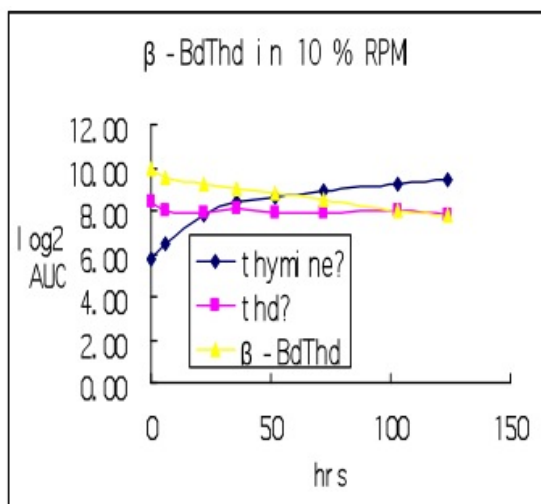

| $\beta$ -BdThd | RPMI | 10 % RPMI | FBS   |
|----------------|------|-----------|-------|
| T1/2 (hrs)     | 21.8 | 61.3      | 192.3 |

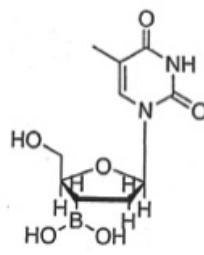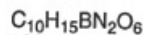

$\beta$ -BdThd

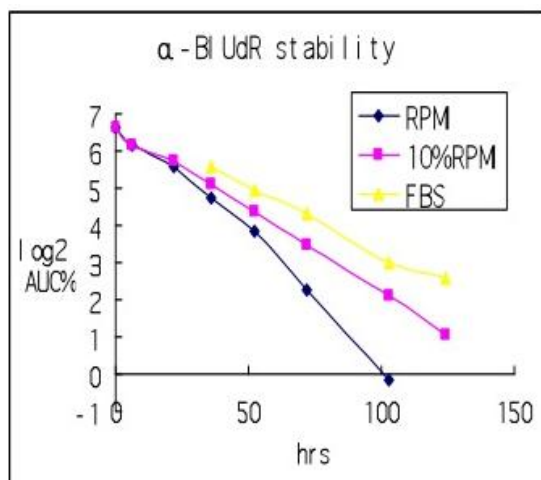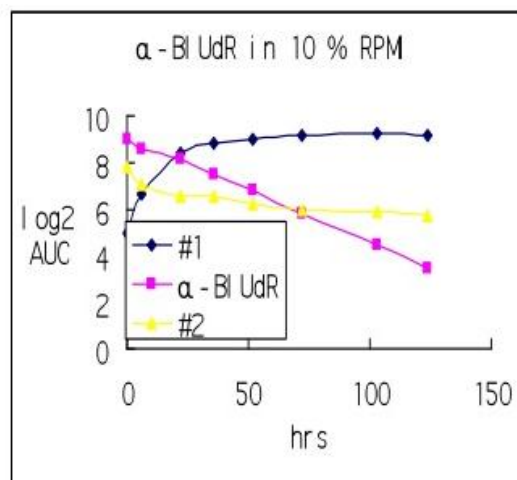

| $\alpha$ -BIUdR | RPMI | 10 % RPMI | FBS  |
|-----------------|------|-----------|------|
| T1/2 (hrs)      | 15.5 | 22.6      | 28.3 |

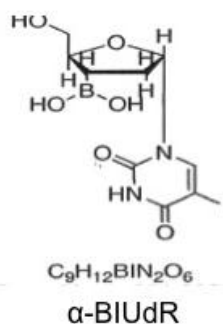

BIUdR is **14c**, IUdR is 5-iodo-2'-deoxyuridine.

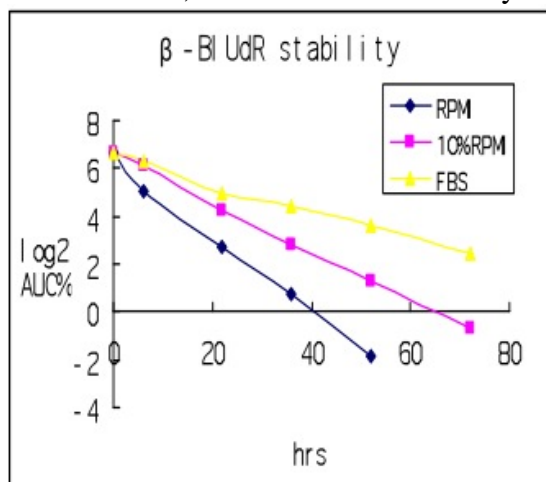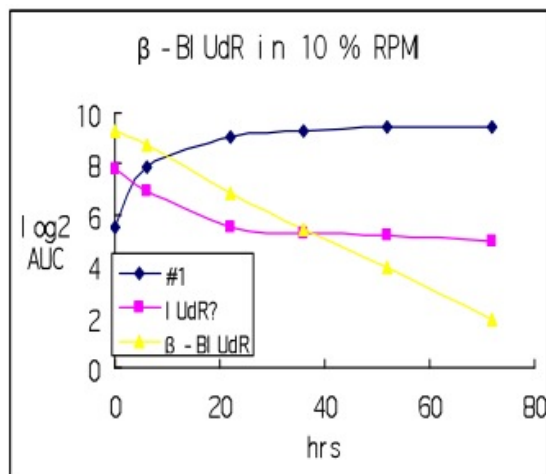

| $\beta$ -BIUdR | RPMI | 10 % RPMI | FBS  |
|----------------|------|-----------|------|
| T1/2 (hrs)     | 6.4  | 9.7       | 17.5 |

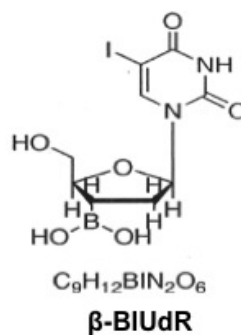

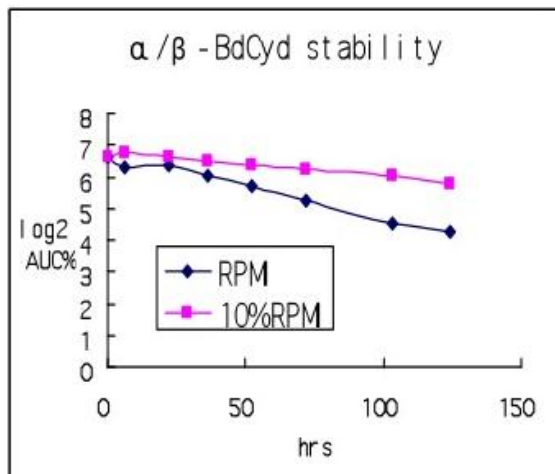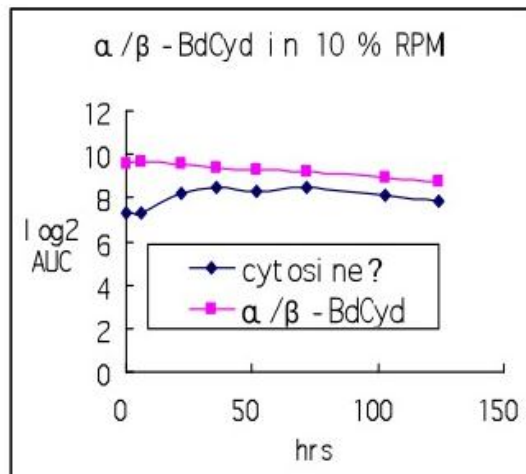

| $\alpha/\beta$ -BdCyd | RPMI | 10 % RPMI | FBS   |
|-----------------------|------|-----------|-------|
| T1/2 (hrs)            | 51.8 | 138.9     | 400.0 |

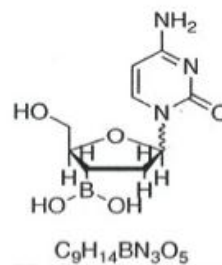

**$\alpha/\beta$ -BdCyd**

BdCyd is **14d**.

| Stability of the compounds at 37 °C |        |           |       |
|-------------------------------------|--------|-----------|-------|
| T1/2 (hrs)                          | RPMI   | 10 % RPMI | FBS   |
| $\beta$ -BFUdR                      | 14.1   | 18.3      | 27.3  |
| $\alpha$ -BdThd                     | 72.5   | 454.5     | 769.2 |
| $\beta$ -BdThd                      | 21.8   | 61.3      | 192.3 |
| $\alpha$ -BIUdR                     | 15.5   | 22.6      | 28.3  |
| $\beta$ -BIUdR                      | 6.4    | 9.7       | 17.5  |
| $\alpha/\beta$ -BdCyd               | 51.8   | 138.9     | 400.0 |
| IUdR                                | 769.2  | 625.0     | 166.7 |
| FUdR                                | stable | stable    |       |
